# Supplementary material for: Linking transcriptional and genetic tumor heterogeneity through allele analysis of single-cell RNA-seq data
Source: HighWire-hosted journal article supplement (doi:10.1101/gr.228080.117), 2018-06-13
Supplement: Supplemental_Tables.zip [file Supplemental_Table_S1.xlsx]

## Sheet: allele model results
seqnames	start	end	width	strand	avg.del.loh.allele	del.loh.allele MGH31_A02	del.loh.allele MGH31_A03	del.loh.allele MGH31_A04	del.loh.allele MGH31_A05	del.loh.allele MGH31_A06	del.loh.allele MGH31_A07	del.loh.allele MGH31_A08	del.loh.allele MGH31_A10	del.loh.allele MGH31_A11	del.loh.allele MGH31_B01	del.loh.allele MGH31_B02	del.loh.allele MGH31_B04	del.loh.allele MGH31_B05	del.loh.allele MGH31_B06	del.loh.allele MGH31_B07	del.loh.allele MGH31_B08	del.loh.allele MGH31_B09	del.loh.allele MGH31_B10	del.loh.allele MGH31_C02	del.loh.allele MGH31_C03	del.loh.allele MGH31_C04	del.loh.allele MGH31_C05	del.loh.allele MGH31_C06	del.loh.allele MGH31_C07	del.loh.allele MGH31_C09	del.loh.allele MGH31_C10	del.loh.allele MGH31_C11	del.loh.allele MGH31_D02	del.loh.allele MGH31_D03	del.loh.allele MGH31_D05	del.loh.allele MGH31_D07	del.loh.allele MGH31_D09	del.loh.allele MGH31_D10	del.loh.allele MGH31_D11	del.loh.allele MGH31_D12	del.loh.allele MGH31_E01	del.loh.allele MGH31_E02	del.loh.allele MGH31_E03	del.loh.allele MGH31_E04	del.loh.allele MGH31_E05	del.loh.allele MGH31_E08	del.loh.allele MGH31_E09	del.loh.allele MGH31_E11	del.loh.allele MGH31_E12
chr10	3154461	126670356	123515896	*	0.631473	0	0.76725	0	0.96275	0.96375	0.994	0	0.96225	0.69825	0.85525	0.34375	0.97875	0.98775	0.9195	0	0.755	0.37925	0.85275	0.078	0.6355	0	0.95925	0.25075	0.911	0.72175	0.496	0.9165	0.91675	0.62775	0.4935	0.48425	0.8345	0.98725	0.82725	0.99875	0.081	0.7475	0.8855	0	0	0.99275	0	0.008	0.98
chr13	21949267	114175032	92225766	*	0.688833	0.92425	0.993	0.0105	0.90775	0.9955	0.96075	0	0.13275	0.95475	0.87775	0.98725	0.971	0	0.49425	0	0.767	0.50225	0.91475	0.86275	0.93475	0.95575	0.9935	0.97325	0.26875	0.76975	0.48275	0.87275	0.76075	0.50575	0.96175	0.705	0.6355	0.033	0.9165	0.9005	0.95425	0.896	0.39025	0	0.827	0.52175	0	0.16775	0.7655
chr14	20216560	73465003	53248444	*	0.680227	0.9695	0.9415	0	0.683	0.9365	0.51475	0	0.9445	0.75225	0.838	0.978	0.95425	0	0.507	0	0.82325	0.65225	0.89525	0.97825	0.94775	0.982	0.041	0.96475	0.8375	0.39075	0.154	0.95325	0.84975	0.6955	0.6875	0.93925	0.85225	0.1675	0.949	0.95175	0.65325	0.93625	0.98975	0.1035	0.9965	0.96525	0	0.77925	0.94975
chr19	20727463	47770015	27042553	*	0.47975	0.9355	0.71475	0.0075	0.0515	0.21275	0.99775	0	0.62575	0.011	0.2715	0.98025	0	0	0.04	0.0015	0.835	0.0325	0.763	0.719	0.735	0.0165	0.99275	0.00725	0.092	0.3975	0.6315	0.942	0.734	0.49575	0.64325	0.16225	0.62675	0.998	0.506	0	0.38225	0.01725	0.5565	0	0.91525	0.51175	0	0.4805	0.7065
[truncated: 31 more columns]

## Sheet: expression model results
seqnames	start	end	width	strand	avg.amp.gexp	avg.del.gexp	amp.gexp.MGH31_A02	amp.gexp.MGH31_A03	amp.gexp.MGH31_A04	amp.gexp.MGH31_A05	amp.gexp.MGH31_A06	amp.gexp.MGH31_A07	amp.gexp.MGH31_A08	amp.gexp.MGH31_A10	amp.gexp.MGH31_A11	amp.gexp.MGH31_B01	amp.gexp.MGH31_B02	amp.gexp.MGH31_B04	amp.gexp.MGH31_B05	amp.gexp.MGH31_B06	amp.gexp.MGH31_B07	amp.gexp.MGH31_B08	amp.gexp.MGH31_B09	amp.gexp.MGH31_B10	amp.gexp.MGH31_C02	amp.gexp.MGH31_C03	amp.gexp.MGH31_C04	amp.gexp.MGH31_C05	amp.gexp.MGH31_C06	amp.gexp.MGH31_C07	amp.gexp.MGH31_C09	amp.gexp.MGH31_C10	amp.gexp.MGH31_C11	amp.gexp.MGH31_D02	amp.gexp.MGH31_D03	amp.gexp.MGH31_D05	amp.gexp.MGH31_D07	amp.gexp.MGH31_D09	amp.gexp.MGH31_D10	amp.gexp.MGH31_D11	amp.gexp.MGH31_D12	amp.gexp.MGH31_E01	amp.gexp.MGH31_E02	amp.gexp.MGH31_E03	amp.gexp.MGH31_E04	amp.gexp.MGH31_E05	amp.gexp.MGH31_E08	amp.gexp.MGH31_E09	amp.gexp.MGH31_E11
chr7	816615	158956747	158140133	*	0.89885	0	0.984	0.9565	0.28625	0.99875	0.9955	0.994	0.315	0.98575	0.98825	0.9925	0.96175	0.99125	0.25625	0.995	0.56425	0.9865	0.99	0.981	0.979	0.9935	0.9985	0.993	0.998	0.9845	0.92775	0.9135	0.9845	0.7145	0.9965	0.9875	0.97925	0.966	0.9835	0.98175	0.98125	0.9755	0.98825	0.99325	0.28425	0.99175	0.99525	0.43175	0.949
chr10	274190	133373689	133099500	*	0	0.904163	0	0	0	0	0	0	0	0	0	0	0	0	0	0	0	0	0	0	0	0	0	0	0	0	0	0	0	0	0	0	0	0	0	0	0	0	0	0	0	0	0	0	0
chr13	20403667	114305817	93902151	*	0	0.781307	0	0	0	0	0	0	0	0	0	0	0	0	0	0	0	0	0	0	0	0	0	0	0	0	0	0	0	0	0	0	0	0	0	0	0	0	0	0	0	0	0	0	0
chr14	20256558	105480170	85223613	*	0	0.755117	0	0	0	0	0	0	0	0	0	0	0	0	0	0	0	0	0	0	0	0	0	0	0	0	0	0	0	0	0	0	0	0	0	0	0	0	0	0	0	0	0	0	0
chr20	325401	64287821	63962421	*	0.771773	0	0.96025	0.721	0.33325	0.9135	0.9555	0.99775	0.34175	0.98675	0.6195	0.33775	0.978	0.98225	0.47875	0.86025	0.51825	0.60275	0.98825	0.582	0.91725	0.936	0.949	0.976	0.93	0.26875	0.3695	0.82075	0.76725	0.7755	0.6315	0.27925	0.97625	0.72275	0.97475	0.98875	0.98625	0.86825	0.94975	0.97975	0.41375	0.99675	0.9845	0.548	0.8455
[truncated: 107 more columns]
