# Supplementary material for: Linking transcriptional and genetic tumor heterogeneity through allele analysis of single-cell RNA-seq data
Source: HighWire-hosted journal article supplement (doi:10.1101/gr.228080.117), 2018-06-13
Supplement: Supplemental_Tables.zip [file Supplemental_Table_S3.xlsx]

## Sheet: Karyotype
	Cytogenetics	43,X,-X,+1,dic(1;9)(p13;q34),add(8)(p21),-13,-18, der(22)t(18;22)(q11.2;q11.2)[13]/46,XX[7]
	FISH probe	Interpretation	Result
	IGF/FGFR3	IGH/FGFR3 rearrangement (2 fusion signals)	0.815
	IGH/MAFB	IGH rearrangement (IGH, 3 signals)	0.835
	IGH/MAF	IGH rearrangement (IGH, 3 signals)	0.825
	IGH/CCND1	IGH rearrangement (IGH, 3 signals)	0.805
	1q21/1p32	gain of 1q21 (CSK1B, 3 signals)	0.835
	TP53/CEP17	loss of 17p13.1 (TP53, 1 signal)	0.175
	DI3S319	loss of 13q (DI3S319, DI3S1825, 1 signal)	0.845

## Sheet: Identified CNVs
Amplifications
seqnames	start (GRCh38)	end (GRCh38)	width	strand
chr1	153618787	248919946	95301160	*
chr8	60516857	128101253	67584397	*
chr11	62771629	68272001	5500373	*
Deletions
seqnames	start (GRCh38)	end (GRCh38)	width	strand
chr13	19633681	113845744	94212064	*
chr22	29073078	50783663	21710586	*
