# Supplementary material for: Linking transcriptional and genetic tumor heterogeneity through allele analysis of single-cell RNA-seq data
Source: HighWire-hosted journal article supplement (doi:10.1101/gr.228080.117), 2018-06-13
Supplement: Supplemental_Tables.zip [file Supplemental_Table_S4.xlsx]

## Sheet: MM34_good_regions_rgprob
seqnames	start	end	width	strand	MM34A_01_GGACTCCT-AGAGTAGA	MM34A_02_AGGCAGAA-ACTGCATA	MM34A_03_TAAGGCGA-CTAAGCCT	MM34A_05_CGTACTAG-CTCTCTAT	MM34A_06_CAGAGAGG-CTCTCTAT	MM34A_07_CGTACTAG-CTAAGCCT	MM34A_11_GGACTCCT-ACTGCATA	MM34A_13_TCCTGAGC-TAGATCGC	MM34A_14_TAGGCATG-TATCCTCT	MM34A_15_CTCTCTAC-AAGGAGTA	MM34A_16_CGTACTAG-AAGGAGTA	MM34A_17_TAAGGCGA-AAGGAGTA	MM34A_18_CAGAGAGG-AGAGTAGA	MM34A_19_GGACTCCT-TATCCTCT	MM34A_20_TAGGCATG-TAGATCGC	MM34A_21_TAGGCATG-AAGGAGTA	MM34A_22_CAGAGAGG-TAGATCGC	MM34A_23_TCCTGAGC-AAGGAGTA	MM34A_24_TAGGCATG-AGAGTAGA	MM34A_25_TCCTGAGC-CTAAGCCT	MM34A_30_CTCTCTAC-ACTGCATA	MM34A_33_AGGCAGAA-TATCCTCT	MM34A_34_CTCTCTAC-TAGATCGC	MM34A_35_GGACTCCT-CTAAGCCT	MM34A_36_AGGCAGAA-GTAAGGAG	MM34A_37_AGGCAGAA-CTAAGCCT	MM34A_38_CTCTCTAC-TATCCTCT	MM34A_39_CGTACTAG-GTAAGGAG	MM34A_41_TAAGGCGA-ACTGCATA	MM34A_43_TAAGGCGA-AGAGTAGA	MM34A_44_TAGGCATG-ACTGCATA	MM34A_46_CAGAGAGG-GTAAGGAG	MM34A_48_AGGCAGAA-AAGGAGTA	MM34A_49_GGACTCCT-GTAAGGAG	MM34A_50_GGACTCCT-TAGATCGC	MM34A_51_TCCTGAGC-TATCCTCT	MM34A_53_TCCTGAGC-ACTGCATA	MM34A_54_CAGAGAGG-ACTGCATA	MM34A_56_CTCTCTAC-CTCTCTAT	MM34A_57_TCCTGAGC-AGAGTAGA	MM34A_58_CGTACTAG-TATCCTCT	MM34A_59_AGGCAGAA-AGAGTAGA	MM34A_63_AGGCAGAA-CTCTCTAT	MM34A_64_CGTACTAG-ACTGCATA	MM34A_66_TAAGGCGA-TAGATCGC
chr1	36827125	110144296	73317172	*	1	1	0.99925	1	0.991	1	0.9985	0.999	0.99325	1	1	1	0.98625	1	0.99975	0.99975	0.9765	0.99475	1	1	0.99275	0.9975	0.994	1	1	1	0.16775	1	1	1	0.9975	0.99925	0.99775	0.99475	0.9985	1	1	0.67	0.98975	0.50325	0.9995	1	0.9975	1	1
chr3	38052725	72432251	34379527	*	0.99925	0.9535	0.98825	0.6175	0.95625	0.998	0.9825	0.9935	0.995	0.99075	0.98375	0.99975	0.9625	0.944	0.986	0.999	0.806	0.999	0.999	0.997	0.967	0.99425	0.9975	0.9995	0.9985	0.9995	0.9535	0.996	0.99925	1	0.97525	0.89975	0.9975	0.99725	0.981	0.997	0.69975	0.94825	0.978	0.91175	0.99975	0.99775	0.9975	0.37875	0.99475
chr6	2047772	17834316	15786545	*	0.9805	0.69275	0.10875	0	0	0.98425	0.95825	0.98475	0.95875	0.83575	0.9565	0.887	0.94325	0.96	0.91075	0.695	0.67325	0.914	0.90925	0.95475	0.82325	0	0.68475	0.70575	0.8435	0.95275	0.688	0	0.982	0	0.98125	0.843	0.91725	0.97425	0.99875	0.69425	0.9505	0.95425	0	0.91575	0.5345	0.982	0.977	0.95975	0.96475
chr8	120592406	144397688	23805283	*	0.98625	0.9125	0.91575	0.98525	0.90625	0.97	0.93125	0.89125	0.9555	0.96575	0.94075	0.9565	0.8295	0.96	0.82875	0.95275	0.925	0.97675	0.8345	0.91425	0.97025	0.95	0.90175	0.8985	0.947	0.9455	0.891	0.91675	0.95825	0.89575	0.9075	0.90675	0.926	0.688	0.954	0.8335	0.96275	0.8175	0.91325	0.961	0.96	0.98525	0.95825	0.93075	0.91475
chr13	20067011	113878263	93811253	*	0.97975	0.988	0.99825	0.9995	0.82775	0.9985	0.976	0.94675	0.94375	0.9865	0.989	0.9975	0.69675	0.89025	0.98675	0.9935	0.927	0.985	0.9085	0.995	0.819	0.9785	0.951	0.875	0.99425	0.9805	0.81	0.99625	1	0	0.9755	0.938	1	0.95875	0.9015	0.9825	0.9925	0.498	0.7905	0.9925	0.99975	0.99025	0.90375	0.9895	0.99875
chr14	25101589	106135569	81033981	*	0.978	0.9985	0.99975	0.9945	0.90075	1	0.9985	0.9965	0.992	0.99825	1	0.99975	0.987	0.9815	0.993	0.99925	0.918	0.99975	0.9995	1	0.98	1	0.9595	0.995	0.99975	0.998	0.97375	0.9975	1	0.991	0.99875	0.89475	0.9975	0.99875	0.996	0.99875	1	0.9865	0.993	0.9775	0.999	0.995	0.99925	1	1
chr16	33392231	89855169	56462939	*	0.91275	0.99975	0.99675	0.99025	0.83375	0.90925	0.99825	0.92625	0.8825	0.99575	0.985	0.9825	0.95025	0.923	0.99475	0.99075	0.31875	0.9895	0.94475	0.98525	0.94625	0.98125	0.895	0.995	0.974	0.97575	0.89925	1	0.95025	0.98	0.98525	0.814	0.999	0.99075	0.98525	0.95025	1	0.95575	0.821	0.9975	0.997	0.88825	0.98	0.829	0.988
chr17	455383	13980350	13524968	*	0.98675	0.813	0.9195	0.8385	0.909	0.9075	0.9615	0.9765	0.89775	0.68225	0.81325	0.975	0.492	0.48875	0.923	0.96725	0.887	0.964	0.81675	0.80875	0.92325	0.6805	0.6355	0.98175	0.697	0.82025	0.83425	0.82725	0.95575	0.96125	0.79975	0.823	0.8255	0.6695	0.97	0.95025	0.82175	0.51925	0.94525	0.8115	0.89425	0.68275	0.915	0.68825	0.8945
[truncated: 16 more columns]
