# Supplementary material for: Linking transcriptional and genetic tumor heterogeneity through allele analysis of single-cell RNA-seq data
Source: HighWire-hosted journal article supplement (doi:10.1101/gr.228080.117), 2018-06-13
Supplement: Supplemental_Tables.zip [file Supplemental_Table_S5.xlsx]

## Sheet: ediff.genes.final_heatmap
	ediff.genes.final	ediff.names	CHR	START	END	STRAND	TYPE
1	ENSG00000170312	CDK1	chr10	62538089	62554610	+	protein_coding
2	ENSG00000066279	ASPM	chr1	197053258	197115824	-	protein_coding
3	ENSG00000123219	CENPK	chr5	64813593	64858998	-	protein_coding
4	ENSG00000051825	MPHOSPH9	chr12	123636867	123728561	-	protein_coding
5	ENSG00000171241	SHCBP1	chr16	46614466	46655538	-	protein_coding
6	ENSG00000143228	NUF2	chr1	163236366	163325554	+	protein_coding
7	ENSG00000137804	NUSAP1	chr15	41624892	41673248	+	protein_coding
8	ENSG00000145191	EIF2B5	chr3	183852826	184402546	+	protein_coding
9	ENSG00000109911	ELP4	chr11	31531297	31805546	+	protein_coding
10	ENSG00000100162	CENPM	chr22	42334725	42343168	-	protein_coding
11	ENSG00000203760	CENPW	chr6	126661320	126670021	+	protein_coding
12	ENSG00000101146	RAE1	chr20	55926066	55954267	+	protein_coding
13	ENSG00000132646	PCNA	chr20	5095599	5107272	-	protein_coding
14	ENSG00000131779	PEX11B	chr1	145516252	145523730	+	protein_coding
15	ENSG00000151725	CENPU	chr4	185615772	185655287	-	protein_coding
16	ENSG00000100865	CINP	chr14	102808956	102829253	-	protein_coding
17	ENSG00000061794	MRPS35	chr12	27863706	27909228	+	protein_coding
18	ENSG00000114054	PCCB	chr3	135969148	136056738	+	protein_coding
19	ENSG00000147155	EBP	chrX	48379546	48387104	+	protein_coding
20	ENSG00000108039	XPNPEP1	chr10	111624524	111683311	+	protein_coding
21	ENSG00000090432	MUL1	chr1	20825943	20834654	-	protein_coding
22	ENSG00000129347	KRI1	chr19	10663761	10676713	-	protein_coding
23	ENSG00000165512	ZNF22	chr10	45495923	45500774	+	protein_coding
24	ENSG00000013392	RWDD2A	chr6	83903098	83908651	+	protein_coding
25	ENSG00000108175	ZMIZ1	chr10	80828792	81076276	+	protein_coding
26	ENSG00000149554	CHEK1	chr11	125495036	125546150	+	protein_coding
27	ENSG00000163923	RPL39L	chr3	186838736	186898696	-	protein_coding
28	ENSG00000136270	TBRG4	chr7	45139699	45151646	+	protein_coding
29	ENSG00000165304	MELK	chr9	36572859	36677678	+	protein_coding
30	ENSG00000143942	CHAC2	chr2	53994929	54002333	+	protein_coding
31	ENSG00000101346	POFUT1	chr20	30795683	30826470	+	protein_coding
32	ENSG00000165389	SPTSSA	chr14	34901995	34931562	+	protein_coding
33	ENSG00000165891	E2F7	chr12	77415027	77459360	-	protein_coding
34	ENSG00000172336	POP7	chr7	100303676	100305118	+	protein_coding
35	ENSG00000108592	FTSJ3	chr17	61896793	61907372	-	protein_coding
36	ENSG00000138138	ATAD1	chr10	89511269	89601100	-	protein_coding
37	ENSG00000143971	ETAA1	chr2	67624451	67637677	+	protein_coding
38	ENSG00000149150	SLC43A1	chr11	57252007	57283259	-	protein_coding
39	ENSG00000166224	SGPL1	chr10	72575717	72640930	+	protein_coding
40	ENSG00000172500	FIBP	chr11	65651212	65656010	-	protein_coding
41	ENSG00000155906	RMND1	chr6	151725989	151773259	-	protein_coding
42	ENSG00000113615	SEC24A	chr5	133984479	134063513	+	protein_coding
43	ENSG00000159596	TMEM69	chr1	46152886	46160115	+	protein_coding
44	ENSG00000114126	TFDP2	chr3	141663277	141868386	+	protein_coding
45	ENSG00000074582	BCS1L	chr2	219523487	219528166	+	protein_coding
46	ENSG00000113407	TARS	chr5	33440802	33469644	+	protein_coding
47	ENSG00000106785	TRIM14	chr9	100831557	100881494	+	protein_coding
48	ENSG00000044459	CNTLN	chr9	17134980	17503921	+	protein_coding
49	ENSG00000113300	CNOT6	chr5	179921412	180005405	+	protein_coding
50	ENSG00000101639	CEP192	chr18	12991361	13125051	+	protein_coding
51	ENSG00000188428	BLOC1S5	chr6	8013800	8064647	-	protein_coding
52	ENSG00000169299	PGM2	chr4	37828255	37864558	+	protein_coding
53	ENSG00000118496	FBXO30	chr6	146114638	146135889	-	protein_coding
54	ENSG00000132313	MRPL35	chr2	86426478	86440917	+	protein_coding
55	ENSG00000116688	MFN2	chr1	12040238	12073571	+	protein_coding
56	ENSG00000129187	DCTD	chr4	183811213	183839089	-	protein_coding
57	ENSG00000162623	TYW3	chr1	75198836	75232362	+	protein_coding
58	ENSG00000004059	ARF5	chr7	127228399	127231759	+	protein_coding
59	ENSG00000113734	BNIP1	chr5	172571445	172591390	+	protein_coding
60	ENSG00000165661	QSOX2	chr9	139098179	139137687	-	protein_coding
61	ENSG00000136010	ALDH1L2	chr12	105413568	105478355	-	protein_coding
62	ENSG00000133265	HSPBP1	chr19	55773599	55791749	-	protein_coding
63	ENSG00000121644	DESI2	chr1	244816237	244872335	+	protein_coding
64	ENSG00000254887		chr19	42636707	42641251	-	antisense
65	ENSG00000260257		chr20	31444848	31446557	+	lincRNA
66	ENSG00000267906	ENSG00000267906	chr7	16828866	16829246	+	protein_coding
67	ENSG00000216863	LY86-AS1	chr6	6346698	6623004	-	antisense
68	ENSG00000143498	TAF1A	chr1	222731244	222763275	-	protein_coding
69	ENSG00000038532	CLEC16A	chr16	11038345	11276046	+	protein_coding
70	ENSG00000129675	ARHGEF6	chrX	135747706	135864247	-	protein_coding
71	ENSG00000111860	CEP85L	chr6	118781935	119031238	-	protein_coding
72	ENSG00000255733	IFNG-AS1	chr12	68383225	68628466	+	antisense
73	ENSG00000109686	SH3D19	chr4	152023903	152246784	-	protein_coding
74	ENSG00000169432	SCN9A	chr2	167051695	167232503	-	protein_coding
75	ENSG00000146433	TMEM181	chr6	158957468	159056460	+	protein_coding
76	ENSG00000161912	ADCY10P1	chr6	41068761	41108571	+	pseudogene
77	ENSG00000100055	CYTH4	chr22	37678068	37711382	+	protein_coding
78	ENSG00000137494	ANKRD42	chr11	82904781	82971736	+	protein_coding
79	ENSG00000188234	AGAP4	chr10	46321042	46349323	-	protein_coding
80	ENSG00000204304	PBX2	chr6	32152512	32157963	-	protein_coding
81	ENSG00000273311	DGCR11	chr22	19033675	19035888	-	sense_intronic
82	ENSG00000132849	INADL	chr1	62208149	62629592	+	protein_coding
83	ENSG00000222872	RNU4-78P	chr3	42263332	42263457	+	snRNA
84	ENSG00000068001	HYAL2	chr3	50355221	50360337	-	protein_coding
85	ENSG00000252361	RNU6-118P	chr11	62583438	62583539	-	snRNA
86	ENSG00000204130	RUFY2	chr10	70100864	70167051	-	protein_coding
87	ENSG00000157881	PANK4	chr1	2439972	2458039	-	protein_coding
88	ENSG00000143093	STRIP1	chr1	110574199	110617263	+	protein_coding
89	ENSG00000185267	CDNF	chr10	14861249	14880574	-	protein_coding
90	ENSG00000116194	ANGPTL1	chr1	178818840	178840187	-	protein_coding
91	ENSG00000256006		chr11	18427156	18428278	+	sense_intronic
92	ENSG00000088340	FER1L4	chr20	34146507	34195484	-	pseudogene
93	ENSG00000141458	NPC1	chr18	21086148	21166862	-	protein_coding
94	ENSG00000259644		chr15	30020390	30021735	-	sense_intronic
95	ENSG00000205250	E2F4	chr16	67226072	67232821	+	protein_coding
96	ENSG00000241860		chr1	141474	149707	-	processed_transcript
97	ENSG00000108515	ENO3	chr17	4851387	4860426	+	protein_coding
98	ENSG00000175414	ARL10	chr5	175792471	175828866	+	protein_coding
99	ENSG00000182179	UBA7	chr3	49842640	49851379	-	protein_coding
100	ENSG00000104870	FCGRT	chr19	50010073	50029590	+	protein_coding
101	ENSG00000258111		chr12	104907807	104908217	+	pseudogene
102	ENSG00000266538		chr17	15434087	15434403	-	lincRNA
103	ENSG00000092421	SEMA6A	chr5	115779312	115910630	-	protein_coding
104	ENSG00000117643	MAN1C1	chr1	25943959	26112698	+	protein_coding
105	ENSG00000188786	MTF1	chr1	38275239	38325292	-	protein_coding
106	ENSG00000074370	ATP2A3	chr17	3827169	3867736	-	protein_coding
107	ENSG00000166405	RIC3	chr11	8127597	8190602	-	protein_coding
108	ENSG00000167261	DPEP2	chr16	68021297	68034489	-	protein_coding
109	ENSG00000121966	CXCR4	chr2	136871919	136875735	-	protein_coding
110	ENSG00000145819	ARHGAP26	chr5	142149949	142608576	+	protein_coding
111	ENSG00000154265	ABCA5	chr17	67240452	67323385	-	protein_coding
112	ENSG00000244405	ETV5	chr3	185764097	185828107	-	protein_coding
113	ENSG00000154898	CCDC144CP	chr17	20224477	20306870	+	pseudogene
114	ENSG00000149485	FADS1	chr11	61567099	61596790	-	protein_coding
115	ENSG00000152689	RASGRP3	chr2	33661391	33789817	+	protein_coding
116	ENSG00000039068	CDH1	chr16	68771128	68869451	+	protein_coding
117	ENSG00000187239	FNBP1	chr9	132649466	132805473	-	protein_coding
118	ENSG00000172345	STARD5	chr15	81601394	81616524	-	protein_coding
119	ENSG00000175898	ENSG00000175898	chr19	10332111	10333870	-	lincRNA
120	ENSG00000117090	SLAMF1	chr1	160577890	160617085	-	protein_coding

## Sheet: ediff.genes_mm34only_heatmap
	lb	mle	ub	ce	Z
ENSG00000051825	2.14959	5.13127	7.00349	2.14959	3.44711
ENSG00000165512	1.87222	4.64588	7.6969	1.87222	3.32829
ENSG00000100162	1.80288	4.8539	6.93415	1.80288	3.15591
ENSG00000118496	1.59485	4.8539	6.79546	1.59485	2.97256
ENSG00000100865	1.38683	4.29917	7.07283	1.38683	2.91533
ENSG00000090432	1.73354	5.06193	7.14217	1.73354	2.91094
ENSG00000172336	1.38683	4.36851	6.79546	1.38683	2.89477
ENSG00000108592	1.17881	4.16049	7.00349	1.17881	2.8301
ENSG00000165072	1.73354	5.13127	7.55822	1.73354	2.76227
ENSG00000145191	1.04012	4.02181	6.93415	1.04012	2.72637
ENSG00000131779	1.52551	5.20061	7.28085	1.52551	2.72493
ENSG00000185215	0.832098	3.32839	5.89403	0.832098	2.62576
ENSG00000149289	1.10946	4.5072	6.24073	1.10946	2.57459
ENSG00000110400	1.04012	4.43785	6.24073	1.04012	2.55506
ENSG00000113300	0.901439	4.02181	7.21151	0.901439	2.54395
ENSG00000177675	0.832098	4.02181	6.03271	0.832098	2.50693
ENSG00000100311	1.04012	4.64588	6.86481	1.04012	2.46925
ENSG00000167208	0.901439	4.29917	6.86481	0.901439	2.46415
ENSG00000149150	0.832098	4.02181	6.03271	0.832098	2.4443
ENSG00000108175	0.762756	4.09115	6.44876	0.762756	2.43149
ENSG00000172164	0.693415	3.95246	6.5181	0.693415	2.42568
ENSG00000151725	0.762756	4.09115	6.24073	0.762756	2.42491
ENSG00000119922	1.04012	4.57654	6.31007	1.04012	2.41414
ENSG00000169242	0.832098	4.43785	6.44876	0.832098	2.40049
ENSG00000143942	0.624073	3.53642	6.58744	0.624073	2.39885
ENSG00000101346	0.624073	3.6751	6.24073	0.624073	2.37585
ENSG00000113615	0.48539	2.98168	5.89403	0.48539	2.37175
ENSG00000155906	0.693415	4.09115	5.96337	0.693415	2.36456
ENSG00000120458	0.624073	3.95246	6.24073	0.624073	2.33241
ENSG00000170312	0.901439	5.26995	7.28085	0.901439	2.31646
ENSG00000165389	0.554732	3.95246	6.17139	0.554732	2.31066
ENSG00000171241	0.624073	4.22983	6.10205	0.624073	2.30973
ENSG00000188428	0.624073	4.22983	6.24073	0.624073	2.30524
ENSG00000138138	0.346707	2.77366	5.47798	0.346707	2.29641
ENSG00000109911	0.48539	3.81378	5.89403	0.48539	2.28508
ENSG00000159596	0.554732	3.95246	5.96337	0.554732	2.28294
ENSG00000168301	0.693415	4.43785	6.31007	0.693415	2.27738
ENSG00000100281	0.346707	2.91234	5.61666	0.346707	2.25958
ENSG00000128965	0.48539	3.88312	6.24073	0.48539	2.2517
ENSG00000137804	0.346707	3.12037	6.17139	0.346707	2.2472
ENSG00000121644	0.416049	3.12037	6.17139	0.416049	2.24644
ENSG00000214367	0.416049	3.60576	6.72612	0.416049	2.23042
ENSG00000169245	0.48539	4.09115	6.10205	0.48539	2.2148
ENSG00000163923	0.346707	3.60576	5.61666	0.346707	2.21037
ENSG00000165304	0.48539	4.09115	6.93415	0.48539	2.20811
ENSG00000066279	0.48539	4.22983	6.17139	0.48539	2.20716
ENSG00000160932	0.208024	2.42695	4.8539	0.208024	2.19573
ENSG00000131653	0.346707	3.6751	5.686	0.346707	2.19369
ENSG00000081177	0.346707	3.6751	5.89403	0.346707	2.17412
ENSG00000186416	0.346707	3.95246	6.31007	0.346707	2.16399
ENSG00000127870	0.346707	3.60576	6.31007	0.346707	2.1626
ENSG00000184575	0.208024	2.35761	4.71522	0.208024	2.16192
ENSG00000172500	0.208024	2.63498	5.54732	0.208024	2.15323
ENSG00000108039	0.208024	2.91234	5.96337	0.208024	2.14664
ENSG00000004059	0.208024	3.32839	5.96337	0.208024	2.14122
ENSG00000265713	0.416049	4.29917	6.5181	0.416049	2.13481
ENSG00000136270	0.277366	3.60576	6.72612	0.277366	2.13421
ENSG00000061794	0.208024	2.63498	5.40863	0.208024	2.13415
ENSG00000101146	0.208024	3.05102	5.96337	0.208024	2.13354
ENSG00000165891	0.277366	3.88312	6.03271	0.277366	2.11659
ENSG00000165661	0.208024	3.74444	5.61666	0.208024	2.1083
ENSG00000161638	0.208024	3.60576	6.44876	0.208024	2.10622
ENSG00000149554	0.138683	2.77366	6.17139	0.138683	2.09879
ENSG00000198604	0.138683	2.35761	4.71522	0.138683	2.09764
ENSG00000143971	0.208024	3.53642	5.47798	0.208024	2.09656
ENSG00000123219	0.277366	4.16049	6.24073	0.277366	2.09538
ENSG00000140983	0.208024	3.81378	6.31007	0.208024	2.09534
ENSG00000176853	0.138683	2.56563	5.13127	0.138683	2.09136
ENSG00000106785	0.208024	4.02181	5.89403	0.208024	2.09042
ENSG00000075415	0.138683	2.28827	4.64588	0.138683	2.0897
ENSG00000113407	0.0693415	2.28827	4.64588	0.0693415	2.08634
ENSG00000074582	0.138683	2.77366	6.03271	0.138683	2.08201
ENSG00000129187	0.138683	2.77366	5.54732	0.138683	2.07128
ENSG00000162623	0.138683	3.18971	6.10205	0.138683	2.05524
ENSG00000129347	0.138683	3.60576	5.75534	0.138683	2.05491
ENSG00000044459	0.138683	3.53642	5.61666	0.138683	2.04616
ENSG00000114054	0.0693415	3.05102	5.82468	0.0693415	2.04321
ENSG00000133265	0.0693415	3.60576	5.61666	0.0693415	2.03315
ENSG00000113734	0.0693415	3.46707	5.82468	0.0693415	2.02726
ENSG00000204394	0.0693415	2.77366	5.686	0.0693415	2.02575
ENSG00000143228	0.0693415	3.6751	5.82468	0.0693415	2.02166
ENSG00000141298	0.0693415	2.91234	5.75534	0.0693415	2.01784
ENSG00000132646	0.0693415	2.843	6.03271	0.0693415	2.01736
ENSG00000013392	0.0693415	3.81378	5.96337	0.0693415	2.01225
ENSG00000136010	0	2.42695	5.20061	0	2.00701
ENSG00000115808	0.0693415	3.18971	5.96337	0.0693415	2.00641
ENSG00000155961	0.0693415	3.46707	5.54732	0.0693415	2.00459
ENSG00000214706	0	2.70432	5.96337	0	2.0041
ENSG00000203760	0.0693415	3.46707	5.33929	0.0693415	2.00329
ENSG00000151151	0	3.46707	6.17139	0	1.99968
ENSG00000114126	0	3.18971	6.17139	0	1.99808
ENSG00000166224	0	3.39773	6.58744	0	1.99657
ENSG00000105135	0	4.16049	6.37942	0	1.99035
ENSG00000132313	0	2.70432	6.31007	0	1.98538
ENSG00000147155	0	2.35761	4.92324	0	1.98475
ENSG00000151458	0	3.05102	5.96337	0	1.98187
ENSG00000112511	0	2.35761	4.99259	0	1.98094
ENSG00000116688	0	2.77366	5.686	0	1.96982
ENSG00000101639	0	2.63498	5.96337	0	1.96753
ENSG00000260436	0	3.32839	5.33929	0	1.96648
ENSG00000137656	0	3.60576	5.686	0	1.96603
ENSG00000169299	0	3.60576	6.31007	0	1.96588
ENSG00000123685	0	3.88312	5.686	0	1.96561
ENSG00000196581	0	3.25905	5.75534	0	1.96336
ENSG00000123575	0	3.46707	6.37942	0	1.96142
ENSG00000132256	0	3.25905	5.61666	0	1.96079
ENSG00000173065	-5.96337	-2.70432	-0.0693415	-0.0693415	-1.96044
ENSG00000228302	-5.26995	-3.32839	-0.0693415	-0.0693415	-1.96609
ENSG00000121417	-6.37942	-4.29917	-0.0693415	-0.0693415	-1.96753
ENSG00000161912	-5.61666	-3.53642	-0.0693415	-0.0693415	-1.97508
ENSG00000188206	-5.82468	-3.88312	-0.0693415	-0.0693415	-1.97577
ENSG00000212978	-5.54732	-3.6751	-0.0693415	-0.0693415	-1.97751
ENSG00000132849	-6.37942	-3.12037	-0.0693415	-0.0693415	-1.98271
ENSG00000144566	-4.8539	-2.35761	-0.0693415	-0.0693415	-1.9901
ENSG00000158552	-6.31007	-3.60576	-0.0693415	-0.0693415	-1.99119
ENSG00000196507	-5.33929	-3.32839	-0.0693415	-0.0693415	-1.99127
ENSG00000165819	-5.96337	-3.60576	-0.0693415	-0.0693415	-1.99539
ENSG00000240183	-5.54732	-3.60576	-0.0693415	-0.0693415	-1.99579
ENSG00000264112	-5.96337	-4.09115	-0.138683	-0.138683	-1.99927
ENSG00000164823	-6.03271	-4.09115	-0.138683	-0.138683	-1.99927
ENSG00000136940	-6.44876	-3.60576	-0.138683	-0.138683	-2.00308
ENSG00000171861	-5.54732	-3.46707	-0.138683	-0.138683	-2.00595
ENSG00000254887	-5.54732	-3.46707	-0.138683	-0.138683	-2.00718
ENSG00000241860	-5.54732	-3.46707	-0.138683	-0.138683	-2.0083
ENSG00000085224	-4.64588	-2.35761	-0.0693415	-0.0693415	-2.01433
ENSG00000260733	-5.82468	-3.95246	-0.138683	-0.138683	-2.01592
ENSG00000156162	-5.75534	-3.74444	-0.138683	-0.138683	-2.01696
ENSG00000088340	-6.03271	-3.60576	-0.138683	-0.138683	-2.01837
ENSG00000267906	-5.47798	-3.46707	-0.138683	-0.138683	-2.02077
ENSG00000100601	-5.47798	-3.53642	-0.138683	-0.138683	-2.02596
ENSG00000216863	-5.75534	-3.81378	-0.138683	-0.138683	-2.02827
ENSG00000104731	-5.686	-3.6751	-0.138683	-0.138683	-2.03499
ENSG00000157077	-5.40863	-3.46707	-0.138683	-0.138683	-2.03561
ENSG00000175414	-5.686	-2.77366	-0.138683	-0.138683	-2.03562
ENSG00000154898	-5.26995	-2.56563	-0.138683	-0.138683	-2.03891
ENSG00000204304	-5.47798	-3.39773	-0.138683	-0.138683	-2.0426
ENSG00000008282	-7.00349	-4.5072	-0.208024	-0.208024	-2.04309
ENSG00000168256	-5.75534	-3.74444	-0.208024	-0.208024	-2.04617
ENSG00000101138	-6.31007	-3.46707	-0.208024	-0.208024	-2.05131
ENSG00000104870	-5.82468	-2.91234	-0.138683	-0.138683	-2.0568
ENSG00000223309	-6.10205	-3.88312	-0.208024	-0.208024	-2.06111
ENSG00000092421	-5.54732	-3.60576	-0.208024	-0.208024	-2.06112
ENSG00000074370	-5.54732	-2.77366	-0.138683	-0.138683	-2.06368
ENSG00000068001	-5.33929	-3.39773	-0.208024	-0.208024	-2.06493
ENSG00000182179	-6.58744	-3.05102	-0.208024	-0.208024	-2.07026
ENSG00000111860	-6.72612	-3.39773	-0.208024	-0.208024	-2.07144
ENSG00000013619	-5.75534	-3.88312	-0.277366	-0.277366	-2.07523
ENSG00000171097	-5.54732	-3.60576	-0.208024	-0.208024	-2.07546
ENSG00000130304	-5.61666	-3.60576	-0.208024	-0.208024	-2.07807
ENSG00000256060	-5.89403	-3.81378	-0.277366	-0.277366	-2.07808
ENSG00000185267	-5.47798	-3.53642	-0.208024	-0.208024	-2.07878
ENSG00000259644	-6.24073	-3.88312	-0.277366	-0.277366	-2.08184
ENSG00000003393	-6.24073	-3.6751	-0.277366	-0.277366	-2.08233
ENSG00000188786	-5.40863	-2.56563	-0.208024	-0.208024	-2.0864
ENSG00000145819	-5.47798	-2.56563	-0.208024	-0.208024	-2.08669
ENSG00000146433	-6.10205	-3.18971	-0.208024	-0.208024	-2.0898
ENSG00000115145	-6.10205	-3.81378	-0.346707	-0.346707	-2.1146
ENSG00000175898	-5.61666	-2.91234	-0.277366	-0.277366	-2.11999
ENSG00000196418	-6.24073	-3.53642	-0.277366	-0.277366	-2.12034
ENSG00000100292	-6.10205	-4.16049	-0.346707	-0.346707	-2.12349
ENSG00000169432	-6.24073	-2.98168	-0.277366	-0.277366	-2.12679
ENSG00000222872	-5.54732	-3.60576	-0.346707	-0.346707	-2.13346
ENSG00000039068	-5.20061	-2.63498	-0.277366	-0.277366	-2.13718
ENSG00000129675	-6.37942	-3.6751	-0.346707	-0.346707	-2.14253
ENSG00000116874	-5.61666	-3.6751	-0.346707	-0.346707	-2.1468
ENSG00000256006	-5.686	-3.74444	-0.346707	-0.346707	-2.15134
ENSG00000038532	-6.17139	-3.46707	-0.346707	-0.346707	-2.15251
ENSG00000273311	-5.89403	-3.95246	-0.48539	-0.48539	-2.16461
ENSG00000109572	-6.72612	-2.98168	-0.346707	-0.346707	-2.16502
ENSG00000215066	-6.24073	-4.09115	-0.416049	-0.416049	-2.16997
ENSG00000159082	-6.58744	-3.81378	-0.416049	-0.416049	-2.17049
ENSG00000148803	-5.96337	-3.74444	-0.416049	-0.416049	-2.17434
ENSG00000083097	-6.10205	-3.60576	-0.346707	-0.346707	-2.17669
ENSG00000108515	-5.89403	-3.95246	-0.416049	-0.416049	-2.17851
ENSG00000100055	-5.54732	-2.77366	-0.277366	-0.277366	-2.18046
ENSG00000106780	-7.21151	-4.57654	-0.48539	-0.48539	-2.18315
ENSG00000008086	-6.24073	-4.29917	-0.554732	-0.554732	-2.18497
ENSG00000168286	-5.82468	-3.81378	-0.416049	-0.416049	-2.18501
ENSG00000143093	-6.44876	-3.46707	-0.416049	-0.416049	-2.19309
ENSG00000198455	-6.65678	-4.64588	-0.554732	-0.554732	-2.21274
ENSG00000178567	-6.31007	-2.91234	-0.416049	-0.416049	-2.22275
ENSG00000121966	-5.75534	-3.05102	-0.416049	-0.416049	-2.22337
ENSG00000196696	-5.61666	-3.6751	-0.48539	-0.48539	-2.22455
ENSG00000167220	-6.72612	-4.78456	-0.693415	-0.693415	-2.23098
ENSG00000164631	-6.03271	-3.81378	-0.48539	-0.48539	-2.24294
ENSG00000109686	-6.03271	-4.09115	-0.554732	-0.554732	-2.24363
ENSG00000119487	-6.37942	-3.6751	-0.48539	-0.48539	-2.24871
ENSG00000242575	-5.89403	-4.09115	-0.554732	-0.554732	-2.25828
ENSG00000267427	-5.96337	-3.81378	-0.554732	-0.554732	-2.26614
ENSG00000138785	-5.686	-3.74444	-0.554732	-0.554732	-2.26777
ENSG00000102710	-7.00349	-5.06193	-0.901439	-0.901439	-2.27873
ENSG00000083828	-6.10205	-4.22983	-0.693415	-0.693415	-2.28622
ENSG00000128563	-6.24073	-3.53642	-0.554732	-0.554732	-2.28923
ENSG00000248019	-5.89403	-4.09115	-0.693415	-0.693415	-2.31274
ENSG00000181744	-6.10205	-4.09115	-0.693415	-0.693415	-2.32211
ENSG00000143156	-6.31007	-4.22983	-0.693415	-0.693415	-2.325
ENSG00000140382	-5.82468	-3.81378	-0.624073	-0.624073	-2.32705
ENSG00000149485	-6.31007	-3.18971	-0.554732	-0.554732	-2.33801
ENSG00000188234	-5.82468	-3.88312	-0.624073	-0.624073	-2.33889
ENSG00000134709	-6.44876	-3.95246	-0.624073	-0.624073	-2.34049
ENSG00000117643	-5.89403	-3.95246	-0.693415	-0.693415	-2.34099
ENSG00000166405	-5.82468	-2.98168	-0.48539	-0.48539	-2.34417
ENSG00000255733	-6.31007	-3.6751	-0.624073	-0.624073	-2.37506
ENSG00000151093	-6.37942	-4.09115	-0.832098	-0.832098	-2.38997
ENSG00000152503	-5.96337	-4.09115	-0.832098	-0.832098	-2.41111
ENSG00000266538	-5.96337	-4.09115	-0.832098	-0.832098	-2.41289
ENSG00000143498	-6.5181	-4.43785	-0.970781	-0.970781	-2.41553
ENSG00000118922	-6.31007	-4.22983	-0.901439	-0.901439	-2.42678
ENSG00000160305	-7.00349	-4.29917	-0.832098	-0.832098	-2.42888
ENSG00000172345	-5.61666	-2.91234	-0.624073	-0.624073	-2.4291
ENSG00000107938	-6.24073	-4.22983	-0.901439	-0.901439	-2.42998
ENSG00000135698	-6.10205	-4.16049	-0.832098	-0.832098	-2.4417
ENSG00000107518	-6.72612	-4.43785	-0.901439	-0.901439	-2.44816
ENSG00000117408	-6.58744	-4.78456	-1.10946	-1.10946	-2.4644
ENSG00000152689	-6.24073	-3.25905	-0.762756	-0.762756	-2.47906
ENSG00000137494	-6.31007	-4.29917	-0.970781	-0.970781	-2.48778
ENSG00000258111	-6.24073	-4.43785	-0.970781	-0.970781	-2.49237
ENSG00000116194	-6.31007	-4.36851	-1.04012	-1.04012	-2.49621
ENSG00000244405	-5.61666	-2.91234	-0.624073	-0.624073	-2.50326
ENSG00000113318	-6.93415	-4.36851	-0.901439	-0.901439	-2.50932
ENSG00000185065	-6.24073	-4.29917	-1.04012	-1.04012	-2.51575
ENSG00000157881	-6.24073	-4.29917	-0.970781	-0.970781	-2.54349
ENSG00000008277	-6.31007	-4.36851	-1.17881	-1.17881	-2.56981
ENSG00000154265	-6.24073	-3.25905	-0.832098	-0.832098	-2.57504
ENSG00000163536	-6.58744	-4.57654	-1.17881	-1.17881	-2.58838
ENSG00000138231	-6.24073	-4.43785	-1.10946	-1.10946	-2.61361
ENSG00000237719	-6.44876	-4.57654	-1.24815	-1.24815	-2.61538
ENSG00000252361	-6.72612	-3.6751	-0.970781	-0.970781	-2.632
ENSG00000162733	-6.44876	-4.5072	-1.31749	-1.31749	-2.72115
ENSG00000138378	-5.96337	-3.39773	-1.04012	-1.04012	-2.75808
ENSG00000158773	-6.24073	-4.57654	-1.38683	-1.38683	-2.7768
ENSG00000070610	-6.24073	-4.43785	-1.31749	-1.31749	-2.78814
ENSG00000078246	-6.93415	-5.06193	-1.59485	-1.59485	-2.80693
ENSG00000260912	-7.41954	-5.33929	-1.80288	-1.80288	-2.81993
ENSG00000143106	-6.03271	-3.39773	-1.04012	-1.04012	-2.84235
ENSG00000204954	-7.28085	-5.26995	-1.73354	-1.73354	-2.87104
ENSG00000260257	-6.79546	-3.53642	-1.24815	-1.24815	-2.89504
ENSG00000204130	-7.07283	-4.09115	-1.38683	-1.38683	-2.95381
ENSG00000167261	-6.86481	-4.92324	-1.6642	-1.6642	-3.01112
ENSG00000187239	-5.89403	-3.39773	-1.24815	-1.24815	-3.04971
ENSG00000117090	-7.07283	-3.95246	-1.38683	-1.38683	-3.07471
ENSG00000205250	-6.93415	-4.78456	-1.73354	-1.73354	-3.14113
ENSG00000141458	-7.14217	-4.36851	-1.73354	-1.73354	-3.28582
ENSG00000168329	-7.83559	-5.96337	-2.77366	-2.77366	-3.72339
ENSG00000156738	-8.32098	-5.26995	-2.56563	-2.56563	-3.99444

## Sheet: ediff.genes_comb_heatmap
	lb	mle	ub	ce	Z	cZ
ENSG00000173369	6.30046	9.15765	10.0368	6.30046	7.16081	5.87271
ENSG00000132704	5.27481	6.95981	9.52396	5.27481	7.16081	5.87271
ENSG00000110852	4.32241	6.95981	8.64482	4.32241	6.62502	5.34543
ENSG00000164733	4.9085	6.66677	8.27852	4.9085	6.57427	5.31125
ENSG00000165029	4.39567	6.30046	8.27852	4.39567	6.39525	5.15781
ENSG00000170312	4.61546	7.69243	8.79134	4.61546	6.37885	5.15558
ENSG00000125869	3.29675	5.05502	7.76569	3.29675	6.35372	5.14602
ENSG00000066279	4.32241	7.25286	8.35178	4.32241	6.00016	4.76161
ENSG00000114200	3.73632	6.59351	7.5459	3.73632	5.60624	4.29074
ENSG00000169679	3.88284	6.74003	8.57156	3.88284	5.5728	4.2701
ENSG00000186818	2.78393	4.54219	7.76569	2.78393	5.52287	4.22749
ENSG00000117632	3.15023	4.98176	6.95981	3.15023	5.49644	4.20365
ENSG00000138182	2.85719	4.83524	7.5459	2.85719	5.16316	3.84188
ENSG00000214160	2.71066	4.54219	6.37372	2.71066	5.14804	3.83272
ENSG00000173905	2.6374	4.17589	5.71437	2.6374	5.14446	3.83272
ENSG00000148773	3.00371	5.34807	8.20525	3.00371	5.07843	3.76061
ENSG00000114948	2.85719	5.05502	7.1796	2.85719	5.06039	3.74393
ENSG00000136518	2.56414	4.32241	6.95981	2.56414	5.04811	3.73484
ENSG00000077152	3.22349	6.08068	6.88655	3.22349	5.04316	3.73484
ENSG00000168078	3.29675	6.08068	7.10634	3.29675	5.02493	3.7174
ENSG00000182628	2.41762	4.17589	6.59351	2.41762	5.0167	3.71421
ENSG00000122952	3.22349	6.15394	7.03308	3.22349	5.0129	3.71421
ENSG00000123219	3.15023	6.00742	6.88655	3.15023	5.0082	3.71412
ENSG00000051825	3.15023	6.00742	6.95981	3.15023	4.98902	3.70071
ENSG00000164109	2.6374	4.61546	7.39938	2.6374	4.95383	3.66578
ENSG00000164466	2.71066	4.9085	7.10634	2.71066	4.90742	3.61556
ENSG00000120802	2.34436	4.17589	6.37372	2.34436	4.88	3.58469
ENSG00000117748	2.49088	4.46893	6.88655	2.49088	4.85162	3.56268
ENSG00000196636	2.85719	5.34807	7.39938	2.85719	4.83398	3.54916
ENSG00000146918	2.93045	5.93416	6.81329	2.93045	4.73205	3.43745
ENSG00000139679	2.71066	5.49459	7.1796	2.71066	4.6944	3.39168
ENSG00000143476	2.71066	5.20155	7.25286	2.71066	4.67722	3.37316
ENSG00000130021	2.56414	4.9085	7.10634	2.56414	4.67159	3.37009
ENSG00000175063	2.85719	5.78763	6.74003	2.85719	4.63262	3.33925
ENSG00000171241	2.85719	5.71437	6.81329	2.85719	4.62061	3.33083
ENSG00000143228	2.85719	5.71437	6.66677	2.85719	4.59804	3.30502
ENSG00000134802	2.49088	4.98176	6.74003	2.49088	4.58317	3.28898
ENSG00000188404	2.2711	4.24915	7.5459	2.2711	4.57303	3.2838
ENSG00000137804	2.34436	4.39567	7.03308	2.34436	4.56595	3.2838
ENSG00000198826	2.85719	5.78763	6.81329	2.85719	4.56507	3.2838
ENSG00000172594	2.71066	5.64111	6.44699	2.71066	4.55528	3.27435
ENSG00000145194	2.2711	4.39567	7.10634	2.2711	4.54546	3.27398
ENSG00000119969	2.41762	4.46893	7.25286	2.41762	4.54436	3.27398
ENSG00000145191	2.34436	4.61546	6.95981	2.34436	4.52608	3.25636
ENSG00000136521	1.97805	3.66306	5.49459	1.97805	4.51785	3.25208
ENSG00000119866	2.71066	5.56785	6.52025	2.71066	4.49403	3.23361
ENSG00000109911	2.71066	5.56785	6.44699	2.71066	4.49347	3.23361
ENSG00000137040	2.78393	5.64111	6.66677	2.78393	4.49005	3.23361
ENSG00000162735	2.34436	4.54219	7.32612	2.34436	4.44487	3.18284
ENSG00000100162	2.56414	5.42133	6.30046	2.56414	4.39933	3.12747
ENSG00000134690	2.6374	5.56785	6.44699	2.6374	4.37524	3.1009
ENSG00000109805	2.6374	5.78763	6.74003	2.6374	4.37012	3.09695
ENSG00000118308	1.97805	3.80958	6.30046	1.97805	4.35029	3.07298
ENSG00000172269	1.83153	3.51654	5.49459	1.83153	4.3231	3.0448
ENSG00000203760	2.49088	5.34807	6.15394	2.49088	4.30319	3.02053
ENSG00000137563	2.05131	3.80958	6.66677	2.05131	4.29785	3.01612
ENSG00000134061	1.97805	3.88284	6.59351	1.97805	4.25086	2.95741
ENSG00000080986	2.6374	5.64111	6.52025	2.6374	4.24459	2.95664
ENSG00000171848	2.2711	4.46893	7.47264	2.2711	4.24263	2.95664
ENSG00000138442	2.05131	4.02937	7.1796	2.05131	4.24207	2.95664
ENSG00000163882	1.75827	3.51654	5.71437	1.75827	4.2324	2.94611
ENSG00000117724	2.12457	4.10263	7.10634	2.12457	4.21746	2.92989
ENSG00000134291	2.12457	4.24915	6.74003	2.12457	4.18754	2.89518
ENSG00000091140	1.90479	3.80958	6.08068	1.90479	4.17925	2.88641
ENSG00000127083	2.49088	5.34807	6.30046	2.49088	4.16897	2.87486
ENSG00000101146	1.97805	3.9561	6.37372	1.97805	4.16397	2.8706
ENSG00000138778	2.41762	4.98176	6.95981	2.41762	4.16009	2.86788
ENSG00000138376	1.68501	3.44328	5.64111	1.68501	4.15098	2.85788
ENSG00000196083	2.41762	5.27481	6.30046	2.41762	4.14262	2.8489
ENSG00000136522	1.75827	3.51654	5.56785	1.75827	4.12579	2.83298
ENSG00000163823	2.19784	4.76198	6.66677	2.19784	4.12558	2.83298
ENSG00000146670	2.41762	5.34807	6.30046	2.41762	4.11247	2.81731
ENSG00000143776	2.19784	4.61546	6.81329	2.19784	4.10403	2.81038
ENSG00000250337	2.34436	5.27481	6.2272	2.34436	4.10385	2.81038
ENSG00000114346	2.12457	4.17589	6.95981	2.12457	4.08106	2.78314
ENSG00000166557	1.83153	3.80958	6.37372	1.83153	4.08071	2.78314
ENSG00000154556	2.49088	5.42133	6.44699	2.49088	4.06471	2.76574
ENSG00000132646	1.90479	3.9561	6.59351	1.90479	4.01905	2.71886
ENSG00000131779	2.2711	5.42133	6.44699	2.2711	4.01744	2.71886
ENSG00000197061	1.90479	3.73632	5.49459	1.90479	3.97916	2.66991
ENSG00000131747	2.12457	4.17589	6.52025	2.12457	3.97764	2.66991
ENSG00000137807	2.2711	5.20155	6.15394	2.2711	3.95069	2.63984
ENSG00000073803	1.61175	3.29675	5.20155	1.61175	3.94361	2.63568
ENSG00000183137	2.12457	5.05502	5.8609	2.12457	3.93964	2.63458
ENSG00000143294	1.68501	3.66306	6.15394	1.68501	3.92675	2.61857
ENSG00000138160	1.97805	4.46893	6.59351	1.97805	3.92403	2.61696
ENSG00000171766	2.19784	5.05502	6.08068	2.19784	3.92171	2.61589
ENSG00000120885	2.05131	4.98176	5.8609	2.05131	3.8856	2.57773
ENSG00000156735	1.61175	3.51654	5.49459	1.61175	3.87793	2.57072
ENSG00000177565	1.83153	3.66306	5.27481	1.83153	3.87765	2.57072
ENSG00000182287	1.46522	3.07697	5.12828	1.46522	3.87048	2.56477
ENSG00000269728	2.05131	4.9085	5.78763	2.05131	3.86002	2.55409
ENSG00000151725	2.05131	4.98176	5.78763	2.05131	3.85722	2.55219
ENSG00000100865	1.75827	3.88284	6.2272	1.75827	3.8544	2.5513
ENSG00000205542	1.68501	3.66306	5.8609	1.68501	3.84912	2.54687
ENSG00000213186	1.39196	3.07697	5.42133	1.39196	3.84739	2.54644
ENSG00000159228	1.68501	3.66306	6.30046	1.68501	3.82239	2.51842
ENSG00000011426	2.12457	5.34807	6.52025	2.12457	3.82206	2.51842
ENSG00000168116	1.97805	4.83524	5.78763	1.97805	3.80493	2.49992
ENSG00000166801	1.83153	4.02937	6.59351	1.83153	3.80492	2.49992
ENSG00000114503	1.46522	3.07697	4.83524	1.46522	3.79864	2.49291
ENSG00000003056	1.46522	3.22349	5.42133	1.46522	3.79397	2.48821
ENSG00000106144	1.46522	3.15023	5.05502	1.46522	3.78801	2.48163
ENSG00000170365	1.97805	4.9085	5.71437	1.97805	3.7813	2.47593
ENSG00000164611	1.75827	3.9561	6.52025	1.75827	3.77751	2.47244
ENSG00000118596	1.46522	3.29675	5.56785	1.46522	3.76443	2.46136
ENSG00000040275	1.97805	4.83524	5.78763	1.97805	3.75942	2.45771
ENSG00000133119	1.97805	4.83524	5.8609	1.97805	3.72291	2.42037
ENSG00000186073	1.97805	4.83524	5.78763	1.97805	3.71791	2.41712
ENSG00000061794	1.39196	3.07697	5.42133	1.39196	3.70222	2.39783
ENSG00000120253	1.61175	3.80958	6.2272	1.61175	3.70008	2.39655
ENSG00000169139	1.3187	3.07697	5.27481	1.3187	3.6913	2.38567
ENSG00000043093	1.61175	3.37002	4.9085	1.61175	3.68425	2.37726
ENSG00000197299	1.97805	4.83524	5.93416	1.97805	3.67645	2.3753
ENSG00000132182	1.53849	3.51654	6.00742	1.53849	3.67602	2.3753
ENSG00000114209	1.46522	3.22349	5.20155	1.46522	3.67304	2.37344
ENSG00000114054	1.83153	4.02937	6.2272	1.83153	3.67111	2.37286
ENSG00000147155	1.39196	3.15023	5.12828	1.39196	3.67024	2.37286
ENSG00000163808	1.90479	4.83524	5.78763	1.90479	3.66332	2.36629
ENSG00000165480	1.90479	4.83524	5.78763	1.90479	3.65464	2.35544
ENSG00000189057	1.90479	4.76198	5.8609	1.90479	3.64939	2.34956
ENSG00000166881	1.61175	3.88284	6.30046	1.61175	3.64768	2.34878
ENSG00000136143	1.83153	4.76198	5.64111	1.83153	3.64385	2.34492
ENSG00000121152	1.83153	4.76198	5.64111	1.83153	3.62216	2.31511
ENSG00000144369	1.39196	3.15023	5.05502	1.39196	3.60879	2.30087
ENSG00000108039	1.39196	3.22349	5.8609	1.39196	3.60785	2.30087
ENSG00000112742	1.97805	5.05502	6.08068	1.97805	3.60774	2.30087
ENSG00000135845	1.61175	3.73632	6.30046	1.61175	3.60488	2.29957
ENSG00000142731	1.90479	4.9085	6.08068	1.90479	3.60455	2.29957
ENSG00000165490	1.83153	4.76198	5.71437	1.83153	3.5983	2.2956
ENSG00000094880	1.46522	3.37002	6.00742	1.46522	3.59266	2.29376
ENSG00000118193	1.90479	4.76198	6.15394	1.90479	3.58932	2.29051
ENSG00000160862	1.39196	3.22349	5.05502	1.39196	3.58697	2.2887
ENSG00000090432	1.83153	4.76198	5.71437	1.83153	3.56048	2.25923
ENSG00000072571	1.68501	4.32241	6.2272	1.68501	3.55912	2.25923
ENSG00000143742	1.39196	3.15023	4.76198	1.39196	3.55121	2.25393
ENSG00000129347	1.75827	4.68872	5.56785	1.75827	3.54503	2.24646
ENSG00000198715	1.3187	3.15023	5.34807	1.3187	3.54079	2.24333
ENSG00000125962	1.75827	4.61546	5.64111	1.75827	3.54078	2.24333
ENSG00000081237	1.46522	3.51654	6.81329	1.46522	3.5346	2.23583
ENSG00000197563	1.39196	3.37002	5.78763	1.39196	3.52882	2.23374
ENSG00000178562	1.53849	3.88284	6.30046	1.53849	3.52795	2.23374
ENSG00000091732	1.68501	4.61546	5.71437	1.68501	3.52481	2.23065
ENSG00000165512	1.46522	3.5898	6.15394	1.46522	3.52023	2.22546
ENSG00000057657	1.46522	3.22349	4.76198	1.46522	3.50423	2.20348
ENSG00000186106	1.68501	4.54219	5.56785	1.68501	3.49094	2.18994
ENSG00000112759	1.39196	3.44328	6.15394	1.39196	3.48935	2.1891
ENSG00000107951	1.17218	2.85719	4.9085	1.17218	3.48751	2.18858
ENSG00000078596	1.24544	2.93045	4.54219	1.24544	3.48698	2.18858
ENSG00000126787	1.75827	4.76198	5.71437	1.75827	3.4816	2.18605
ENSG00000075711	1.24544	3.07697	5.12828	1.24544	3.47823	2.18605
ENSG00000074696	1.3187	3.22349	6.15394	1.3187	3.47732	2.18605
ENSG00000185515	1.3187	3.22349	5.78763	1.3187	3.46821	2.17802
ENSG00000211460	1.3187	3.37002	5.78763	1.3187	3.46797	2.17802
ENSG00000138185	1.68501	4.54219	5.56785	1.68501	3.46541	2.17568
ENSG00000013392	1.68501	4.54219	5.49459	1.68501	3.44226	2.14687
ENSG00000108175	1.53849	4.10263	5.78763	1.53849	3.43901	2.14384
ENSG00000163479	1.3187	3.07697	4.61546	1.3187	3.41594	2.11532
ENSG00000075336	1.24544	3.22349	6.30046	1.24544	3.41248	2.11285
ENSG00000111348	1.3187	3.15023	4.76198	1.3187	3.41239	2.11285
ENSG00000006715	1.24544	3.07697	4.98176	1.24544	3.41032	2.11116
ENSG00000167635	1.24544	3.07697	5.27481	1.24544	3.4063	2.10848
ENSG00000172954	1.39196	3.5898	6.15394	1.39196	3.40571	2.10848
ENSG00000198740	1.24544	3.29675	5.78763	1.24544	3.40067	2.10477
ENSG00000110876	1.24544	3.07697	5.49459	1.24544	3.40044	2.10477
ENSG00000105810	1.24544	3.00371	4.61546	1.24544	3.38863	2.09269
ENSG00000163900	1.17218	2.93045	4.98176	1.17218	3.38215	2.08632
ENSG00000140022	1.09892	2.78393	5.12828	1.09892	3.38196	2.08632
ENSG00000198015	1.17218	3.00371	5.12828	1.17218	3.3599	2.06087
ENSG00000160336	1.39196	3.5898	6.08068	1.39196	3.33979	2.03728
ENSG00000163468	1.24544	3.00371	4.61546	1.24544	3.33156	2.03023
ENSG00000197961	1.39196	3.37002	7.39938	1.39196	3.32769	2.02575
ENSG00000164284	1.46522	4.17589	5.93416	1.46522	3.3166	2.01236
ENSG00000120334	1.61175	4.54219	5.49459	1.61175	3.31537	2.01236
ENSG00000136161	1.39196	3.73632	6.00742	1.39196	3.31034	2.00882
ENSG00000174371	1.61175	4.54219	5.56785	1.61175	3.30334	2.00088
ENSG00000064102	1.09892	2.78393	4.76198	1.09892	3.30013	1.9999
ENSG00000094804	1.39196	3.66306	6.30046	1.39196	3.28873	1.9853
ENSG00000272047	1.3187	3.88284	5.64111	1.3187	3.28717	1.98505
ENSG00000065328	1.53849	4.39567	5.42133	1.53849	3.28687	1.98505
ENSG00000135250	1.02566	2.78393	4.76198	1.02566	3.28238	1.98021
ENSG00000149554	1.17218	3.07697	6.15394	1.17218	3.28041	1.98021
ENSG00000163923	1.46522	4.32241	5.12828	1.46522	3.28038	1.98021
ENSG00000129173	1.46522	4.39567	5.27481	1.46522	3.28031	1.98021
ENSG00000177683	1.02566	2.71066	4.39567	1.02566	3.27788	1.97781
ENSG00000140740	1.09892	3.00371	5.34807	1.09892	3.27224	1.97305
ENSG00000169607	1.46522	4.46893	5.78763	1.46522	3.26665	1.97018
ENSG00000272807	1.46522	4.32241	5.12828	1.46522	3.26646	1.97018
ENSG00000111665	1.46522	4.32241	5.20155	1.46522	3.26624	1.97018
ENSG00000010292	1.3187	3.44328	6.30046	1.3187	3.26006	1.96332
ENSG00000165672	1.09892	2.85719	4.83524	1.09892	3.25835	1.96196
ENSG00000259623	1.46522	4.32241	5.49459	1.46522	3.25088	1.95192
ENSG00000184489	1.39196	4.24915	5.20155	1.39196	3.24048	1.93986
ENSG00000093000	1.02566	2.6374	4.39567	1.02566	3.23777	1.9374
ENSG00000136270	1.17218	3.29675	5.93416	1.17218	3.23645	1.9374
ENSG00000148935	1.24544	3.44328	6.00742	1.24544	3.23278	1.93505
ENSG00000145375	1.17218	3.22349	5.64111	1.17218	3.23104	1.93505
ENSG00000116117	1.39196	4.10263	5.56785	1.39196	3.23003	1.93505
ENSG00000145386	1.39196	4.24915	5.20155	1.39196	3.2278	1.93505
ENSG00000136824	1.02566	2.85719	5.34807	1.02566	3.22324	1.93285
ENSG00000049759	1.46522	4.32241	5.42133	1.46522	3.21991	1.93074
ENSG00000125703	1.39196	4.24915	5.27481	1.39196	3.21877	1.93074
ENSG00000160803	0.952396	2.71066	4.9085	0.952396	3.21583	1.92865
ENSG00000187323	1.09892	3.07697	5.49459	1.09892	3.2151	1.92865
ENSG00000134202	1.39196	4.24915	5.12828	1.39196	3.21313	1.92682
ENSG00000165304	1.3187	3.66306	6.08068	1.3187	3.20567	1.91785
ENSG00000150753	1.02566	2.78393	4.83524	1.02566	3.2031	1.91511
ENSG00000171862	1.3187	3.29675	4.98176	1.3187	3.18557	1.8964
ENSG00000095002	1.3187	3.73632	5.78763	1.3187	3.18526	1.8964
ENSG00000168496	1.02566	2.93045	5.34807	1.02566	3.18342	1.8964
ENSG00000240291	1.39196	4.24915	5.12828	1.39196	3.18332	1.8964
ENSG00000146085	1.24544	3.5898	5.78763	1.24544	3.18327	1.8964
ENSG00000144034	1.17218	3.37002	5.93416	1.17218	3.17842	1.89129
ENSG00000117533	1.17218	3.44328	6.15394	1.17218	3.17493	1.88712
ENSG00000089692	1.39196	4.17589	5.20155	1.39196	3.17296	1.88525
ENSG00000134532	1.39196	4.24915	5.49459	1.39196	3.16934	1.882
ENSG00000104412	1.02566	2.93045	5.34807	1.02566	3.16909	1.882
ENSG00000112234	1.39196	4.17589	5.20155	1.39196	3.16863	1.882
ENSG00000164163	0.952396	2.6374	4.61546	0.952396	3.16406	1.87618
ENSG00000174446	1.17218	3.44328	5.71437	1.17218	3.15579	1.86636
ENSG00000075407	0.952396	2.71066	4.68872	0.952396	3.15542	1.86636
ENSG00000116747	1.02566	2.71066	4.32241	1.02566	3.15448	1.86603
ENSG00000109861	1.09892	3.29675	6.08068	1.09892	3.14835	1.85987
ENSG00000108773	1.3187	4.17589	5.12828	1.3187	3.14827	1.85987
ENSG00000093009	1.3187	4.24915	6.00742	1.3187	3.13872	1.84977
ENSG00000146802	1.02566	2.93045	5.49459	1.02566	3.13223	1.84521
ENSG00000135521	0.952396	2.71066	5.49459	0.952396	3.13083	1.84418
ENSG00000143942	1.09892	3.29675	5.93416	1.09892	3.12887	1.84418
ENSG00000198130	1.02566	2.85719	5.20155	1.02566	3.12885	1.84418
ENSG00000138821	0.952396	2.6374	4.54219	0.952396	3.12874	1.84418
ENSG00000114988	1.3187	4.39567	5.20155	1.3187	3.12393	1.84005
ENSG00000227268	1.3187	4.24915	5.12828	1.3187	3.11579	1.82976
ENSG00000101346	1.17218	3.51654	5.64111	1.17218	3.11495	1.82954
ENSG00000179115	1.09892	3.29675	6.00742	1.09892	3.11308	1.82797
ENSG00000143727	0.952396	2.71066	4.61546	0.952396	3.11254	1.82797
ENSG00000197372	1.24544	4.10263	5.12828	1.24544	3.0845	1.79452
ENSG00000139734	1.24544	4.10263	4.98176	1.24544	3.08204	1.79348
ENSG00000123975	0.952396	2.85719	5.05502	0.952396	3.08186	1.79348
ENSG00000138363	0.879134	2.71066	4.98176	0.879134	3.08179	1.79348
ENSG00000170540	0.952396	2.71066	4.83524	0.952396	3.08024	1.79214
ENSG00000176087	1.09892	3.22349	5.8609	1.09892	3.07692	1.78913
ENSG00000160856	1.02566	3.15023	5.71437	1.02566	3.07552	1.78801
ENSG00000213965	0.879134	2.71066	4.46893	0.879134	3.07395	1.78759
ENSG00000082781	1.02566	2.93045	6.08068	1.02566	3.0615	1.77163
ENSG00000123485	1.3187	4.17589	5.27481	1.3187	3.05973	1.77008
ENSG00000136869	0.952396	2.93045	5.20155	0.952396	3.05917	1.77008
ENSG00000117222	0.879134	2.6374	4.61546	0.879134	3.05611	1.76844
ENSG00000074800	0.952396	2.78393	4.32241	0.952396	3.05338	1.76626
ENSG00000163964	0.879134	2.6374	4.9085	0.879134	3.05172	1.76472
ENSG00000163535	1.09892	3.44328	5.93416	1.09892	3.05022	1.7641
ENSG00000075945	0.952396	2.85719	5.27481	0.952396	3.04804	1.76209
ENSG00000090889	1.24544	4.32241	5.34807	1.24544	3.0357	1.74892
ENSG00000071243	0.879134	2.56414	5.42133	0.879134	3.03558	1.74892
ENSG00000121864	1.02566	3.07697	6.08068	1.02566	3.03052	1.74211
ENSG00000048544	1.02566	2.93045	4.9085	1.02566	3.0296	1.74168
ENSG00000175854	1.17218	4.02937	4.9085	1.17218	3.02296	1.73542
ENSG00000137265	0.952396	2.71066	4.39567	0.952396	3.01499	1.72409
ENSG00000163629	1.09892	3.5898	5.49459	1.09892	3.01261	1.7214
ENSG00000075142	0.805873	2.56414	4.32241	0.805873	3.01073	1.72132
ENSG00000154589	0.879134	2.49088	4.17589	0.879134	3.01064	1.72132
ENSG00000071539	1.17218	4.10263	5.05502	1.17218	3.00284	1.71609
ENSG00000164219	0.879134	2.71066	5.05502	0.879134	2.98611	1.69405
ENSG00000136243	0.879134	2.71066	5.20155	0.879134	2.97658	1.68216
ENSG00000106809	1.17218	4.02937	5.12828	1.17218	2.9707	1.67494
ENSG00000112308	0.952396	2.85719	4.54219	0.952396	2.96409	1.67126
ENSG00000104447	0.952396	3.00371	5.71437	0.952396	2.96401	1.67126
ENSG00000162736	0.879134	2.71066	4.68872	0.879134	2.96304	1.67071
ENSG00000165389	1.09892	3.9561	4.98176	1.09892	2.95279	1.66241
ENSG00000113790	0.805873	2.71066	5.71437	0.805873	2.9505	1.66241
ENSG00000165891	1.17218	4.10263	5.12828	1.17218	2.95015	1.66241
ENSG00000185238	0.952396	3.15023	5.56785	0.952396	2.95011	1.66241
ENSG00000148943	0.805873	2.49088	4.46893	0.805873	2.94862	1.66149
ENSG00000196247	1.17218	4.24915	5.56785	1.17218	2.94552	1.6576
ENSG00000150756	1.09892	3.9561	4.98176	1.09892	2.92761	1.64079
ENSG00000188971	0.952396	3.15023	5.64111	0.952396	2.92694	1.64064
ENSG00000140263	1.09892	3.9561	4.9085	1.09892	2.92402	1.63857
ENSG00000172336	0.952396	3.22349	5.20155	0.952396	2.922	1.63659
ENSG00000221955	1.09892	3.9561	4.9085	1.09892	2.91837	1.63274
ENSG00000197008	1.17218	4.10263	5.12828	1.17218	2.91662	1.63128
ENSG00000143297	0.732612	2.49088	4.54219	0.732612	2.91613	1.63128
ENSG00000108592	0.952396	3.22349	5.56785	0.952396	2.91496	1.63126
ENSG00000082516	1.02566	3.73632	5.71437	1.02566	2.91421	1.63126
ENSG00000132185	0.732612	2.34436	3.9561	0.732612	2.91231	1.62996
ENSG00000142945	1.09892	4.10263	5.12828	1.09892	2.90913	1.62776
ENSG00000163872	0.805873	2.78393	4.98176	0.805873	2.90882	1.62776
ENSG00000137054	1.02566	3.88284	5.49459	1.02566	2.90743	1.62731
ENSG00000198477	1.09892	4.02937	5.20155	1.09892	2.90422	1.62414
ENSG00000149100	0.732612	2.34436	4.02937	0.732612	2.90281	1.62283
ENSG00000120699	0.879134	2.85719	5.20155	0.879134	2.90133	1.62196
ENSG00000101928	1.09892	3.73632	5.78763	1.09892	2.90112	1.62196
ENSG00000184293	0.805873	2.71066	4.9085	0.805873	2.89742	1.61794
ENSG00000138138	0.805873	2.6374	4.76198	0.805873	2.89583	1.61634
ENSG00000143971	1.09892	3.88284	4.9085	1.09892	2.89378	1.61402
ENSG00000186141	0.879134	2.78393	5.64111	0.879134	2.89318	1.61396
ENSG00000124207	0.879134	2.85719	5.05502	0.879134	2.89071	1.61274
ENSG00000139154	0.732612	2.34436	4.24915	0.732612	2.8889	1.61079
ENSG00000175455	0.952396	3.44328	5.27481	0.952396	2.88672	1.60824
ENSG00000087586	1.02566	3.51654	5.71437	1.02566	2.87678	1.59529
ENSG00000136261	0.805873	2.71066	4.9085	0.805873	2.87282	1.5917
ENSG00000149150	1.02566	3.88284	4.76198	1.02566	2.87042	1.58968
ENSG00000101938	1.02566	3.88284	4.98176	1.02566	2.8674	1.58667
ENSG00000111581	0.805873	2.78393	6.52025	0.805873	2.8645	1.58384
ENSG00000173542	1.02566	3.73632	5.34807	1.02566	2.8637	1.58345
ENSG00000006530	0.732612	2.6374	5.49459	0.732612	2.86148	1.58266
ENSG00000115204	0.732612	2.49088	5.05502	0.732612	2.86095	1.58266
ENSG00000147099	1.02566	4.10263	5.05502	1.02566	2.86078	1.58266
ENSG00000092201	0.805873	2.6374	4.68872	0.805873	2.85698	1.57806
ENSG00000198042	0.805873	2.78393	4.9085	0.805873	2.8552	1.57613
ENSG00000112855	1.02566	3.88284	4.9085	1.02566	2.85092	1.57281
ENSG00000133393	0.732612	2.49088	4.54219	0.732612	2.84812	1.57005
ENSG00000075188	0.879134	3.29675	5.27481	0.879134	2.84805	1.57005
ENSG00000198945	1.02566	3.88284	4.9085	1.02566	2.84708	1.57005
ENSG00000189114	0.879134	2.85719	5.71437	0.879134	2.84689	1.57005
ENSG00000173207	0.732612	2.41762	4.39567	0.732612	2.84221	1.56589
ENSG00000156298	0.805873	2.71066	5.56785	0.805873	2.84023	1.5648
ENSG00000176890	0.952396	3.88284	4.83524	0.952396	2.83991	1.5648
ENSG00000070950	0.879134	3.15023	5.49459	0.879134	2.83584	1.56091
ENSG00000205403	0.952396	3.44328	5.34807	0.952396	2.82948	1.55386
ENSG00000151849	0.879134	3.29675	5.34807	0.879134	2.82924	1.55386
ENSG00000254004	1.02566	3.88284	5.12828	1.02566	2.82086	1.5434
ENSG00000255717	0.732612	2.6374	4.98176	0.732612	2.82017	1.5434
ENSG00000120333	0.732612	2.6374	4.9085	0.732612	2.81951	1.5434
ENSG00000164167	0.732612	2.6374	5.05502	0.732612	2.81892	1.5434
ENSG00000138399	0.805873	2.93045	5.56785	0.805873	2.81481	1.53797
ENSG00000165983	0.732612	2.78393	5.12828	0.732612	2.81443	1.53797
ENSG00000135972	0.879134	3.15023	5.49459	0.879134	2.81218	1.53579
ENSG00000124562	0.732612	2.41762	4.24915	0.732612	2.81139	1.53579
ENSG00000163002	0.805873	2.93045	5.49459	0.805873	2.80467	1.52996
ENSG00000160049	0.732612	2.78393	5.34807	0.732612	2.80198	1.52735
ENSG00000131238	0.659351	2.34436	4.32241	0.659351	2.80002	1.5261
ENSG00000168090	0.659351	2.49088	4.17589	0.659351	2.79964	1.5261
ENSG00000154839	0.732612	2.6374	4.76198	0.732612	2.79802	1.52537
ENSG00000106484	0.879134	3.29675	5.56785	0.879134	2.79713	1.52537
ENSG00000133195	0.659351	2.34436	4.54219	0.659351	2.79594	1.52431
ENSG00000175193	0.659351	2.2711	4.24915	0.659351	2.79493	1.52431
ENSG00000108578	0.879134	3.22349	5.20155	0.879134	2.79493	1.52431
ENSG00000144320	0.659351	2.41762	4.61546	0.659351	2.79127	1.52174
ENSG00000144821	0.952396	3.80958	4.76198	0.952396	2.78602	1.51637
ENSG00000166004	0.805873	3.22349	5.34807	0.805873	2.78293	1.51335
ENSG00000134057	0.952396	3.29675	6.08068	0.952396	2.78148	1.51185
ENSG00000135336	0.659351	2.49088	4.46893	0.659351	2.78085	1.51165
ENSG00000077420	0.732612	2.85719	5.42133	0.732612	2.78008	1.51123
ENSG00000164751	0.805873	2.93045	5.64111	0.805873	2.77953	1.51115
ENSG00000171714	0.732612	2.85719	5.56785	0.732612	2.77785	1.50928
ENSG00000164687	0.659351	2.56414	4.98176	0.659351	2.77138	1.50299
ENSG00000166224	0.732612	2.85719	5.42133	0.732612	2.7707	1.5027
ENSG00000112294	0.952396	3.80958	4.83524	0.952396	2.76657	1.49993
ENSG00000109084	0.732612	2.71066	4.98176	0.732612	2.76648	1.49993
ENSG00000144199	0.879134	3.73632	4.68872	0.879134	2.76235	1.49652
ENSG00000084652	0.659351	2.49088	4.54219	0.659351	2.75858	1.49423
ENSG00000101166	0.659351	2.41762	4.17589	0.659351	2.75808	1.49423
ENSG00000147905	0.659351	2.49088	4.61546	0.659351	2.75507	1.49118
ENSG00000129055	0.58609	2.2711	4.17589	0.58609	2.75331	1.49071
ENSG00000075399	0.879134	3.73632	4.68872	0.879134	2.75087	1.48761
ENSG00000071794	0.659351	2.41762	5.56785	0.659351	2.74548	1.48011
ENSG00000185477	0.58609	2.34436	4.10263	0.58609	2.74517	1.48011
ENSG00000177888	0.879134	3.80958	4.9085	0.879134	2.74452	1.47983
ENSG00000113522	0.659351	2.41762	4.61546	0.659351	2.74283	1.47979
ENSG00000161888	0.732612	3.00371	5.20155	0.732612	2.74278	1.47979
ENSG00000075239	0.58609	2.19784	4.02937	0.58609	2.74012	1.47744
ENSG00000143314	0.58609	2.34436	4.32241	0.58609	2.73863	1.47584
ENSG00000164934	0.659351	2.41762	4.76198	0.659351	2.73522	1.47148
ENSG00000156239	0.879134	3.80958	4.76198	0.879134	2.73458	1.47148
ENSG00000100749	0.659351	2.71066	5.42133	0.659351	2.73107	1.46894
ENSG00000188312	0.879134	3.73632	4.61546	0.879134	2.72945	1.46754
ENSG00000111913	0.805873	3.15023	5.56785	0.805873	2.72911	1.46754
ENSG00000180185	0.879134	3.73632	4.61546	0.879134	2.7285	1.46732
ENSG00000161203	0.58609	2.19784	3.9561	0.58609	2.72795	1.4672
ENSG00000107815	0.879134	3.73632	4.83524	0.879134	2.7234	1.46382
ENSG00000120539	0.879134	3.73632	4.83524	0.879134	2.72188	1.46382
ENSG00000148153	0.659351	2.6374	5.42133	0.659351	2.72154	1.46382
ENSG00000108384	0.659351	2.71066	5.49459	0.659351	2.72123	1.46382
ENSG00000164104	0.58609	2.2711	4.10263	0.58609	2.72052	1.46382
ENSG00000123836	0.805873	3.22349	5.34807	0.805873	2.72034	1.46382
ENSG00000125454	0.732612	2.93045	5.71437	0.732612	2.72008	1.46382
ENSG00000213799	0.952396	3.9561	5.27481	0.952396	2.71984	1.46382
ENSG00000206120	0.879134	3.9561	4.98176	0.879134	2.71973	1.46382
ENSG00000162063	0.879134	3.73632	4.76198	0.879134	2.71858	1.46275
ENSG00000155561	0.659351	2.49088	4.83524	0.659351	2.7154	1.45918
ENSG00000172500	0.659351	2.49088	4.98176	0.659351	2.7124	1.45588
ENSG00000084444	0.659351	2.6374	5.34807	0.659351	2.70947	1.45234
ENSG00000165118	0.879134	3.73632	4.83524	0.879134	2.70915	1.45234
ENSG00000133678	0.879134	3.73632	4.68872	0.879134	2.70628	1.45057
ENSG00000197894	0.659351	2.56414	4.98176	0.659351	2.69913	1.44274
ENSG00000132591	0.659351	2.6374	5.42133	0.659351	2.69879	1.44274
ENSG00000075303	0.58609	2.41762	5.56785	0.58609	2.69486	1.44091
ENSG00000128708	0.58609	2.34436	4.46893	0.58609	2.69054	1.43714
ENSG00000106628	0.58609	2.34436	4.68872	0.58609	2.68886	1.43651
ENSG00000121211	0.805873	3.66306	4.54219	0.805873	2.68834	1.43651
ENSG00000106462	0.659351	2.56414	4.68872	0.659351	2.68454	1.43262
ENSG00000119185	0.58609	2.41762	4.61546	0.58609	2.68017	1.42893
ENSG00000135457	0.805873	3.66306	4.68872	0.805873	2.67313	1.41945
ENSG00000147894	0.879134	3.73632	4.9085	0.879134	2.6721	1.41888
ENSG00000130935	0.58609	2.34436	5.34807	0.58609	2.67189	1.41888
ENSG00000183856	0.805873	3.66306	4.54219	0.805873	2.67018	1.41865
ENSG00000160818	0.512828	2.12457	4.02937	0.512828	2.67005	1.41865
ENSG00000138796	0.58609	2.56414	5.20155	0.58609	2.66908	1.41865
ENSG00000138382	0.512828	2.12457	4.17589	0.512828	2.66513	1.41376
ENSG00000196757	0.805873	3.73632	4.83524	0.805873	2.66342	1.41276
ENSG00000129460	0.58609	2.34436	4.46893	0.58609	2.66181	1.41276
ENSG00000168411	0.805873	3.66306	4.68872	0.805873	2.6611	1.41276
ENSG00000024526	0.879134	3.80958	5.05502	0.879134	2.66055	1.41276
ENSG00000242125	0.512828	2.2711	4.46893	0.512828	2.65952	1.41181
ENSG00000163904	0.58609	2.2711	4.39567	0.58609	2.65903	1.41173
ENSG00000162894	0.58609	2.41762	5.12828	0.58609	2.65455	1.40736
ENSG00000147650	0.879134	3.80958	4.9085	0.879134	2.65302	1.40561
ENSG00000155906	0.805873	3.66306	4.68872	0.805873	2.6506	1.40383
ENSG00000101057	0.659351	2.78393	5.20155	0.659351	2.64575	1.39933
ENSG00000116120	0.58609	2.34436	4.61546	0.58609	2.64537	1.39933
ENSG00000176124	0.732612	3.5898	4.54219	0.732612	2.64398	1.39809
ENSG00000158402	0.805873	3.66306	4.61546	0.805873	2.64353	1.39806
ENSG00000145781	0.58609	2.41762	4.61546	0.58609	2.64252	1.39803
ENSG00000166226	0.58609	2.34436	4.10263	0.58609	2.6418	1.39803
ENSG00000041802	0.512828	2.2711	4.76198	0.512828	2.64023	1.39638
ENSG00000152133	0.58609	2.71066	5.34807	0.58609	2.63949	1.39638
ENSG00000104341	0.58609	2.56414	5.93416	0.58609	2.63858	1.39562
ENSG00000126953	0.732612	3.5898	4.54219	0.732612	2.63619	1.3938
ENSG00000173226	0.58609	2.56414	4.76198	0.58609	2.63537	1.3938
ENSG00000112118	0.58609	2.41762	4.61546	0.58609	2.62967	1.38832
ENSG00000075218	0.805873	3.5898	4.68872	0.805873	2.62935	1.38832
ENSG00000147324	0.805873	3.66306	4.83524	0.805873	2.62662	1.38464
ENSG00000086827	0.805873	3.66306	4.83524	0.805873	2.62561	1.3837
ENSG00000108666	0.58609	2.6374	4.98176	0.58609	2.6248	1.38312
ENSG00000104738	0.58609	2.56414	5.05502	0.58609	2.62355	1.38241
ENSG00000116918	0.512828	2.34436	4.76198	0.512828	2.62121	1.37934
ENSG00000156970	0.659351	3.07697	5.20155	0.659351	2.61896	1.37755
ENSG00000155111	0.732612	3.66306	4.61546	0.732612	2.61883	1.37755
ENSG00000083535	0.732612	3.5898	4.68872	0.732612	2.61556	1.37299
ENSG00000102265	0.512828	2.2711	4.39567	0.512828	2.61234	1.36851
ENSG00000138193	0.732612	3.5898	4.61546	0.732612	2.61133	1.36755
ENSG00000175216	0.58609	2.56414	4.9085	0.58609	2.60822	1.36324
ENSG00000058063	0.512828	2.12457	3.73632	0.512828	2.60493	1.35879
ENSG00000127990	0.805873	3.73632	4.83524	0.805873	2.60422	1.35879
ENSG00000148985	0.512828	2.41762	5.20155	0.512828	2.60393	1.35879
ENSG00000113615	0.512828	2.2711	4.83524	0.512828	2.60378	1.35879
ENSG00000182919	0.58609	2.71066	5.34807	0.58609	2.59662	1.35064
ENSG00000010165	0.58609	2.49088	4.98176	0.58609	2.58952	1.34242
ENSG00000159596	0.732612	3.5898	4.54219	0.732612	2.58927	1.34242
ENSG00000050405	0.732612	3.73632	4.83524	0.732612	2.58903	1.34242
ENSG00000088325	0.659351	3.22349	6.52025	0.659351	2.58839	1.34205
ENSG00000114126	0.58609	2.85719	5.27481	0.58609	2.5875	1.34129
ENSG00000140307	0.439567	2.12457	4.39567	0.439567	2.5871	1.34129
ENSG00000165704	0.439567	2.12457	4.46893	0.439567	2.58562	1.34049
ENSG00000146842	0.512828	2.2711	4.10263	0.512828	2.58505	1.34049
ENSG00000104626	0.58609	2.56414	5.12828	0.58609	2.58496	1.34049
ENSG00000101003	0.659351	3.22349	4.83524	0.659351	2.58001	1.33581
ENSG00000131778	0.58609	2.93045	5.27481	0.58609	2.57663	1.33234
ENSG00000173456	0.659351	3.51654	4.54219	0.659351	2.57201	1.32685
ENSG00000156876	0.58609	3.00371	4.83524	0.58609	2.57154	1.32676
ENSG00000163754	0.512828	2.49088	4.76198	0.512828	2.56876	1.32423
ENSG00000152457	0.512828	2.56414	5.20155	0.512828	2.56647	1.32338
ENSG00000051341	0.58609	2.85719	5.49459	0.58609	2.56634	1.32338
ENSG00000159216	0.58609	2.78393	5.20155	0.58609	2.56622	1.32338
ENSG00000173145	0.512828	2.41762	4.98176	0.512828	2.56228	1.32135
ENSG00000196670	0.659351	3.51654	5.12828	0.659351	2.56201	1.32135
ENSG00000162819	0.512828	2.34436	4.24915	0.512828	2.56069	1.32135
ENSG00000198554	0.659351	3.5898	5.12828	0.659351	2.56042	1.32135
ENSG00000196584	0.659351	3.22349	5.12828	0.659351	2.56024	1.32135
ENSG00000013810	0.659351	3.51654	4.46893	0.659351	2.55867	1.32082
ENSG00000198146	0.512828	2.49088	5.56785	0.512828	2.55845	1.32082
ENSG00000151835	0.732612	3.51654	4.76198	0.732612	2.55468	1.31699
ENSG00000149212	0.58609	3.00371	5.12828	0.58609	2.55308	1.31505
ENSG00000164038	0.58609	2.85719	5.42133	0.58609	2.55225	1.31482
ENSG00000187601	0.512828	2.49088	4.9085	0.512828	2.55215	1.31482
ENSG00000258297	0.58609	2.85719	5.34807	0.58609	2.55024	1.31365
ENSG00000138092	0.659351	3.51654	4.46893	0.659351	2.5498	1.31356
ENSG00000122966	0.58609	3.29675	4.76198	0.58609	2.54726	1.31137
ENSG00000060688	0.512828	2.2711	4.68872	0.512828	2.54078	1.30281
ENSG00000139163	0.512828	2.49088	4.17589	0.512828	2.5329	1.29323
ENSG00000081026	0.659351	3.51654	4.61546	0.659351	2.53229	1.29288
ENSG00000109133	0.439567	2.19784	3.80958	0.439567	2.53111	1.29159
ENSG00000130826	0.439567	2.2711	4.32241	0.439567	2.53057	1.2915
ENSG00000111716	0.512828	2.2711	3.80958	0.512828	2.53027	1.2915
ENSG00000182552	0.58609	2.93045	5.42133	0.58609	2.52721	1.29061
ENSG00000143624	0.512828	2.6374	4.83524	0.512828	2.52591	1.28946
ENSG00000105854	0.439567	2.12457	4.46893	0.439567	2.52522	1.28896
ENSG00000163382	0.439567	2.12457	4.10263	0.439567	2.52446	1.2884
ENSG00000183891	0.659351	3.51654	4.39567	0.659351	2.5241	1.2884
ENSG00000068489	0.58609	2.93045	5.05502	0.58609	2.5228	1.2879
ENSG00000119772	0.512828	2.6374	6.00742	0.512828	2.52279	1.2879
ENSG00000198700	0.439567	2.2711	4.39567	0.439567	2.52068	1.28731
ENSG00000145782	0.439567	2.12457	4.02937	0.439567	2.52009	1.28731
ENSG00000152683	0.512828	2.49088	5.05502	0.512828	2.51998	1.28731
ENSG00000116761	0.659351	3.51654	4.54219	0.659351	2.5196	1.28731
ENSG00000167645	0.439567	2.19784	4.9085	0.439567	2.519	1.2873
ENSG00000101407	0.512828	2.56414	4.98176	0.512828	2.51865	1.2873
ENSG00000160190	0.659351	3.51654	4.39567	0.659351	2.51846	1.2873
ENSG00000143486	0.439567	2.34436	4.9085	0.439567	2.51364	1.28202
ENSG00000163918	0.58609	2.93045	5.12828	0.58609	2.51276	1.28202
ENSG00000128654	0.58609	3.15023	4.83524	0.58609	2.51275	1.28202
ENSG00000003989	0.659351	3.5898	4.9085	0.659351	2.51207	1.28202
ENSG00000004455	0.439567	2.34436	4.46893	0.439567	2.51179	1.28202
ENSG00000110002	0.659351	3.5898	4.68872	0.659351	2.51015	1.28162
ENSG00000020922	0.512828	2.49088	4.9085	0.512828	2.50956	1.28162
ENSG00000148688	0.439567	2.34436	5.27481	0.439567	2.50395	1.27603
ENSG00000117650	0.659351	3.9561	5.34807	0.659351	2.50069	1.27136
ENSG00000197498	0.439567	2.34436	4.32241	0.439567	2.5	1.27085
ENSG00000107566	0.512828	2.85719	5.27481	0.512828	2.49734	1.26917
ENSG00000176208	0.512828	2.71066	5.12828	0.512828	2.49451	1.26774
ENSG00000085840	0.659351	3.51654	4.61546	0.659351	2.4944	1.26774
ENSG00000223501	0.58609	3.51654	4.68872	0.58609	2.49295	1.26759
ENSG00000124532	0.439567	2.49088	5.12828	0.439567	2.49187	1.26759
ENSG00000151233	0.659351	3.73632	5.12828	0.659351	2.49185	1.26759
ENSG00000074582	0.512828	2.49088	5.34807	0.512828	2.49169	1.26759
ENSG00000164114	0.58609	3.44328	4.46893	0.58609	2.49089	1.2669
ENSG00000165526	0.512828	2.93045	5.49459	0.512828	2.48641	1.2618
ENSG00000007312	0.366306	1.97805	4.02937	0.366306	2.48452	1.25956
ENSG00000180370	0.439567	2.19784	4.10263	0.439567	2.48383	1.25904
ENSG00000151881	0.439567	2.56414	4.98176	0.439567	2.48203	1.25693
ENSG00000083099	0.366306	2.12457	4.46893	0.366306	2.47844	1.25386
ENSG00000175166	0.439567	2.19784	3.80958	0.439567	2.47774	1.25331
ENSG00000004961	0.512828	2.78393	5.12828	0.512828	2.47604	1.25175
ENSG00000182463	0.58609	3.44328	4.32241	0.58609	2.4749	1.25175
ENSG00000124279	0.512828	3.07697	5.27481	0.512828	2.47486	1.25175
ENSG00000138663	0.439567	2.2711	4.54219	0.439567	2.46948	1.24637
ENSG00000131153	0.439567	2.56414	5.20155	0.439567	2.46911	1.24637
ENSG00000152684	0.512828	3.00371	5.05502	0.512828	2.46832	1.24569
ENSG00000079246	0.439567	2.12457	3.9561	0.439567	2.46749	1.24564
ENSG00000138439	0.58609	3.29675	5.12828	0.58609	2.46719	1.24564
ENSG00000070761	0.58609	3.44328	4.39567	0.58609	2.46686	1.24564
ENSG00000113407	0.366306	2.05131	3.88284	0.366306	2.46523	1.24417
ENSG00000166681	0.58609	3.5898	4.46893	0.58609	2.46446	1.24368
ENSG00000127995	0.439567	2.41762	5.20155	0.439567	2.46411	1.24368
ENSG00000174109	0.58609	3.44328	4.32241	0.58609	2.46386	1.24368
ENSG00000132623	0.58609	3.44328	4.39567	0.58609	2.46119	1.24156
ENSG00000184743	0.366306	2.05131	3.5898	0.366306	2.4609	1.24156
ENSG00000231770	0.439567	2.34436	4.98176	0.439567	2.46041	1.24156
ENSG00000034063	0.512828	2.6374	5.42133	0.512828	2.45696	1.23789
ENSG00000143622	0.512828	2.56414	4.98176	0.512828	2.45672	1.23789
ENSG00000159055	0.512828	2.85719	4.76198	0.512828	2.45212	1.23215
ENSG00000100116	0.512828	3.15023	4.76198	0.512828	2.44975	1.22934
ENSG00000163565	0.366306	2.12457	3.66306	0.366306	2.44888	1.22934
ENSG00000162892	0.58609	3.44328	4.39567	0.58609	2.44669	1.22934
ENSG00000000460	0.512828	3.15023	5.20155	0.512828	2.44609	1.22934
ENSG00000067596	0.439567	2.6374	5.20155	0.439567	2.44594	1.22934
ENSG00000187118	0.439567	2.6374	5.05502	0.439567	2.4458	1.22934
ENSG00000171320	0.439567	2.56414	5.27481	0.439567	2.44534	1.22916
ENSG00000117475	0.366306	2.19784	4.61546	0.366306	2.44484	1.22891
ENSG00000144381	0.439567	2.2711	3.88284	0.439567	2.44431	1.22889
ENSG00000235162	0.512828	3.22349	4.9085	0.512828	2.44029	1.22686
ENSG00000105829	0.366306	2.19784	6.08068	0.366306	2.43826	1.22502
ENSG00000169519	0.439567	2.56414	5.27481	0.439567	2.43741	1.2242
ENSG00000105514	0.366306	2.19784	4.39567	0.366306	2.43399	1.21922
ENSG00000215781	0.512828	3.37002	4.24915	0.512828	2.4303	1.21632
ENSG00000113810	0.366306	2.19784	4.24915	0.366306	2.43025	1.21632
ENSG00000119640	0.512828	3.37002	4.32241	0.512828	2.43012	1.21632
ENSG00000215251	0.366306	2.34436	5.93416	0.366306	2.42427	1.21072
ENSG00000106785	0.512828	3.37002	4.39567	0.512828	2.42286	1.20956
ENSG00000142552	0.512828	3.37002	4.32241	0.512828	2.42148	1.20843
ENSG00000178999	0.512828	3.5898	4.68872	0.512828	2.42	1.20658
ENSG00000102384	0.512828	3.37002	4.39567	0.512828	2.41945	1.20624
ENSG00000177628	0.366306	2.05131	4.24915	0.366306	2.41847	1.2056
ENSG00000180423	0.58609	3.51654	4.68872	0.58609	2.41785	1.2056
ENSG00000173163	0.366306	2.05131	4.02937	0.366306	2.41735	1.2056
ENSG00000006625	0.366306	2.12457	4.61546	0.366306	2.4146	1.20263
ENSG00000169727	0.439567	3.07697	4.83524	0.439567	2.40777	1.19378
ENSG00000164647	0.512828	3.51654	4.46893	0.512828	2.40715	1.19378
ENSG00000029363	0.366306	1.97805	3.51654	0.366306	2.40705	1.19378
ENSG00000205060	0.439567	2.41762	5.49459	0.439567	2.40567	1.19294
ENSG00000167900	0.439567	2.49088	5.27481	0.439567	2.40549	1.19294
ENSG00000143674	0.366306	2.49088	4.9085	0.366306	2.40078	1.18637
ENSG00000110435	0.366306	2.41762	4.98176	0.366306	2.39921	1.18546
ENSG00000161057	0.366306	2.12457	3.88284	0.366306	2.39694	1.18338
ENSG00000155959	0.366306	2.19784	4.32241	0.366306	2.39346	1.18157
ENSG00000044459	0.512828	3.37002	4.39567	0.512828	2.39278	1.18155
ENSG00000077514	0.439567	2.78393	4.98176	0.439567	2.39245	1.18155
ENSG00000153130	0.293045	2.05131	4.02937	0.293045	2.39154	1.18062
ENSG00000176623	0.366306	2.19784	4.83524	0.366306	2.38473	1.17361
ENSG00000170469	0.439567	3.37002	4.32241	0.439567	2.38412	1.17361
ENSG00000105639	0.366306	2.05131	3.88284	0.366306	2.38399	1.17361
ENSG00000076382	0.366306	2.41762	5.78763	0.366306	2.38299	1.17361
ENSG00000078070	0.366306	2.2711	5.34807	0.366306	2.38292	1.17361
ENSG00000188372	0.439567	3.37002	4.32241	0.439567	2.38254	1.17353
ENSG00000172171	0.439567	2.85719	4.98176	0.439567	2.38221	1.17353
ENSG00000088451	0.439567	3.29675	4.32241	0.439567	2.38046	1.17128
ENSG00000111652	0.366306	2.56414	5.05502	0.366306	2.3784	1.16946
ENSG00000138346	0.439567	2.85719	4.9085	0.439567	2.37768	1.16945
ENSG00000174606	0.366306	2.2711	4.9085	0.366306	2.37737	1.16945
ENSG00000163104	0.366306	2.34436	4.98176	0.366306	2.37708	1.16945
ENSG00000120832	0.512828	3.37002	4.46893	0.512828	2.37512	1.16731
ENSG00000124356	0.366306	2.19784	4.54219	0.366306	2.37441	1.1667
ENSG00000132300	0.366306	2.05131	3.80958	0.366306	2.37239	1.16394
ENSG00000179933	0.293045	1.97805	3.9561	0.293045	2.37045	1.16201
ENSG00000198538	0.512828	3.37002	4.76198	0.512828	2.37023	1.16201
ENSG00000164815	0.366306	2.34436	4.76198	0.366306	2.3695	1.16136
ENSG00000171421	0.293045	1.97805	4.10263	0.293045	2.36634	1.15743
ENSG00000175073	0.366306	2.19784	4.24915	0.366306	2.3657	1.15743
ENSG00000100528	0.293045	2.12457	6.08068	0.293045	2.36408	1.15714
ENSG00000160712	0.293045	2.05131	3.80958	0.293045	2.36366	1.15714
ENSG00000205670	0.366306	2.6374	5.20155	0.366306	2.36153	1.15472
ENSG00000171806	0.366306	2.56414	5.34807	0.366306	2.36003	1.15333
ENSG00000125843	0.366306	2.49088	5.12828	0.366306	2.35618	1.15073
ENSG00000167085	0.293045	2.12457	4.46893	0.293045	2.35109	1.14588
ENSG00000140987	0.439567	3.00371	4.76198	0.439567	2.35082	1.14588
ENSG00000160131	0.293045	1.97805	3.80958	0.293045	2.35	1.14586
ENSG00000143401	0.366306	2.19784	3.73632	0.366306	2.34998	1.14586
ENSG00000159259	0.439567	3.29675	4.32241	0.439567	2.3488	1.14444
ENSG00000197050	0.439567	3.37002	4.54219	0.439567	2.34827	1.14411
ENSG00000112029	0.366306	2.71066	4.98176	0.366306	2.34716	1.14281
ENSG00000197062	0.439567	3.37002	4.61546	0.439567	2.34608	1.14157
ENSG00000151348	0.293045	2.2711	4.83524	0.293045	2.34477	1.13999
ENSG00000116667	0.366306	2.49088	4.9085	0.366306	2.34125	1.13825
ENSG00000113300	0.366306	2.6374	5.27481	0.366306	2.33962	1.13673
ENSG00000121807	0.293045	2.12457	4.10263	0.293045	2.33785	1.13441
ENSG00000203668	0.366306	2.56414	5.05502	0.366306	2.33558	1.1327
ENSG00000113387	0.293045	2.05131	3.51654	0.293045	2.33461	1.13164
ENSG00000088179	0.293045	1.97805	4.10263	0.293045	2.33178	1.12874
ENSG00000076003	0.293045	2.05131	4.24915	0.293045	2.33158	1.12874
ENSG00000164096	0.293045	1.97805	3.73632	0.293045	2.33026	1.12778
ENSG00000204370	0.293045	2.05131	3.73632	0.293045	2.32915	1.12734
ENSG00000152219	0.366306	2.49088	5.05502	0.366306	2.32621	1.12303
ENSG00000108506	0.366306	2.85719	5.05502	0.366306	2.32451	1.12204
ENSG00000148481	0.293045	2.34436	4.9085	0.293045	2.32424	1.12204
ENSG00000075213	0.439567	3.44328	4.39567	0.439567	2.32412	1.12204
ENSG00000186871	0.439567	3.44328	4.46893	0.439567	2.32284	1.12059
ENSG00000101639	0.293045	2.41762	5.34807	0.293045	2.32227	1.12017
ENSG00000136379	0.439567	3.22349	4.32241	0.439567	2.32131	1.11963
ENSG00000111300	0.293045	2.05131	4.02937	0.293045	2.3192	1.11697
ENSG00000128915	0.293045	2.12457	4.83524	0.293045	2.31759	1.11507
ENSG00000163281	0.293045	2.49088	4.9085	0.293045	2.31428	1.11167
ENSG00000012048	0.293045	2.12457	5.64111	0.293045	2.31327	1.11104
ENSG00000226950	0.219784	1.90479	3.80958	0.219784	2.31208	1.1096
ENSG00000182481	0.293045	2.19784	4.02937	0.293045	2.31174	1.10955
ENSG00000188428	0.366306	3.29675	4.39567	0.366306	2.30841	1.10612
ENSG00000239900	0.293045	2.05131	4.17589	0.293045	2.30646	1.10444
ENSG00000092470	0.293045	2.2711	4.83524	0.293045	2.30066	1.09805
ENSG00000123444	0.366306	3.22349	4.17589	0.366306	2.30042	1.09805
ENSG00000154328	0.293045	2.2711	4.83524	0.293045	2.29911	1.09691
ENSG00000110060	0.293045	2.56414	5.05502	0.293045	2.29846	1.09686
ENSG00000149792	0.293045	2.19784	4.68872	0.293045	2.29722	1.09634
ENSG00000169299	0.366306	2.78393	4.98176	0.366306	2.29616	1.0956
ENSG00000117399	0.366306	3.29675	4.32241	0.366306	2.29442	1.0941
ENSG00000127980	0.293045	2.2711	5.27481	0.293045	2.29258	1.09283
ENSG00000128059	0.219784	2.05131	4.76198	0.219784	2.29234	1.09283
ENSG00000157212	0.366306	3.22349	4.17589	0.366306	2.28997	1.09145
ENSG00000138031	0.366306	3.29675	4.24915	0.366306	2.28601	1.08542
ENSG00000176171	0.293045	2.85719	4.76198	0.293045	2.28536	1.08534
ENSG00000116857	0.293045	2.19784	5.42133	0.293045	2.28518	1.08534
ENSG00000124813	0.219784	2.05131	4.02937	0.219784	2.28505	1.08534
ENSG00000065534	0.293045	2.41762	5.05502	0.293045	2.28432	1.08464
ENSG00000155252	0.366306	3.29675	4.54219	0.366306	2.28212	1.08277
ENSG00000087502	0.219784	1.90479	3.44328	0.219784	2.28058	1.08197
ENSG00000118496	0.366306	3.22349	4.39567	0.366306	2.27953	1.08074
ENSG00000163159	0.293045	2.41762	4.83524	0.293045	2.27854	1.08011
ENSG00000184445	0.219784	1.97805	4.10263	0.219784	2.27711	1.07874
ENSG00000146410	0.293045	2.49088	4.83524	0.293045	2.27654	1.07842
ENSG00000103042	0.366306	3.22349	4.39567	0.366306	2.27169	1.07178
ENSG00000186501	0.293045	2.49088	4.83524	0.293045	2.27095	1.07106
ENSG00000166845	0.366306	3.22349	4.24915	0.366306	2.27038	1.07062
ENSG00000126749	0.219784	2.05131	4.68872	0.219784	2.26953	1.07023
ENSG00000119231	0.219784	1.97805	3.5898	0.219784	2.26779	1.07007
ENSG00000162639	0.366306	3.29675	4.24915	0.366306	2.26698	1.06945
ENSG00000005187	0.366306	3.22349	4.24915	0.366306	2.2665	1.06915
ENSG00000184661	0.293045	2.6374	5.20155	0.293045	2.26561	1.06913
ENSG00000163006	0.293045	2.6374	4.76198	0.293045	2.26529	1.06913
ENSG00000135862	0.219784	2.12457	4.32241	0.219784	2.26439	1.06913
ENSG00000184357	0.293045	3.15023	4.02937	0.293045	2.26383	1.06869
ENSG00000102178	0.293045	2.85719	4.76198	0.293045	2.26185	1.06707
ENSG00000164087	0.366306	3.29675	4.39567	0.366306	2.26178	1.06707
ENSG00000169019	0.219784	2.2711	4.98176	0.219784	2.26	1.06509
ENSG00000086848	0.293045	2.41762	4.9085	0.293045	2.25887	1.06458
ENSG00000198586	0.219784	2.12457	3.88284	0.219784	2.25854	1.06458
ENSG00000112984	0.366306	3.07697	5.42133	0.366306	2.25794	1.06437
ENSG00000003400	0.219784	1.90479	3.73632	0.219784	2.25766	1.06437
ENSG00000122692	0.219784	1.90479	3.9561	0.219784	2.25709	1.06424
ENSG00000157456	0.293045	2.41762	4.76198	0.293045	2.25637	1.06419
ENSG00000114450	0.219784	2.41762	6.00742	0.219784	2.25545	1.06419
ENSG00000132313	0.219784	2.12457	5.27481	0.219784	2.2554	1.06419
ENSG00000164134	0.219784	1.83153	3.5898	0.219784	2.25528	1.06419
ENSG00000131269	0.293045	2.56414	5.05502	0.293045	2.25365	1.06359
ENSG00000269609	0.293045	3.15023	4.24915	0.293045	2.25155	1.06134
ENSG00000148606	0.293045	2.6374	4.9085	0.293045	2.25018	1.06027
ENSG00000198924	0.293045	3.15023	4.98176	0.293045	2.24879	1.05894
ENSG00000113048	0.219784	2.12457	4.61546	0.219784	2.24753	1.05796
ENSG00000163950	0.219784	2.2711	4.54219	0.219784	2.24543	1.05675
ENSG00000136108	0.219784	2.34436	5.05502	0.219784	2.2433	1.05463
ENSG00000128609	0.219784	1.83153	3.5898	0.219784	2.24014	1.05042
ENSG00000185499	0.293045	2.56414	4.98176	0.293045	2.23916	1.04981
ENSG00000136492	0.293045	3.29675	4.46893	0.293045	2.23175	1.04188
ENSG00000184992	0.219784	2.12457	5.34807	0.219784	2.23155	1.04188
ENSG00000141424	0.219784	2.05131	4.39567	0.219784	2.23141	1.04188
ENSG00000136643	0.293045	3.15023	4.24915	0.293045	2.23095	1.04188
ENSG00000101911	0.146522	1.83153	3.80958	0.146522	2.22842	1.04062
ENSG00000120697	0.219784	1.90479	3.80958	0.219784	2.22758	1.04032
ENSG00000175087	0.219784	2.49088	5.12828	0.219784	2.22717	1.04032
ENSG00000132716	0.146522	1.83153	3.73632	0.146522	2.22711	1.04032
ENSG00000116688	0.219784	2.2711	4.68872	0.219784	2.22512	1.03809
ENSG00000119280	0.293045	3.29675	4.32241	0.293045	2.22491	1.03809
ENSG00000115365	0.293045	2.85719	5.20155	0.293045	2.22274	1.03675
ENSG00000213593	0.219784	1.90479	4.02937	0.219784	2.22162	1.03675
ENSG00000185009	0.219784	2.41762	4.98176	0.219784	2.21942	1.03495
ENSG00000173890	0.146522	1.83153	3.80958	0.146522	2.2193	1.03495
ENSG00000112312	0.219784	2.05131	4.9085	0.219784	2.21826	1.0344
ENSG00000108604	0.293045	3.15023	4.46893	0.293045	2.21812	1.0344
ENSG00000082512	0.293045	3.15023	4.61546	0.293045	2.21768	1.03428
ENSG00000115425	0.293045	3.15023	4.17589	0.293045	2.20992	1.02547
ENSG00000197429	0.293045	3.15023	4.32241	0.293045	2.20864	1.02385
ENSG00000007968	0.219784	2.19784	4.46893	0.219784	2.20812	1.02346
ENSG00000102241	0.146522	1.97805	4.17589	0.146522	2.20688	1.02186
ENSG00000135045	0.293045	3.07697	4.10263	0.293045	2.20608	1.02128
ENSG00000196189	0.219784	1.97805	3.51654	0.219784	2.20597	1.02128
ENSG00000085231	0.146522	1.97805	3.80958	0.146522	2.20291	1.01797
ENSG00000138074	0.146522	1.90479	4.83524	0.146522	2.20285	1.01797
ENSG00000113100	0.293045	3.07697	4.17589	0.293045	2.2019	1.01701
ENSG00000188352	0.219784	2.34436	5.05502	0.219784	2.20137	1.01701
ENSG00000159063	0.146522	1.83153	3.73632	0.146522	2.20136	1.01701
ENSG00000112414	0.219784	2.78393	4.61546	0.219784	2.20114	1.01701
ENSG00000111679	0.146522	1.83153	3.5898	0.146522	2.19941	1.01658
ENSG00000165244	0.219784	2.6374	4.98176	0.219784	2.19896	1.01658
ENSG00000171503	0.219784	2.41762	4.98176	0.219784	2.19828	1.01658
ENSG00000127325	0.219784	3.07697	4.17589	0.219784	2.19792	1.01658
ENSG00000111291	0.219784	2.05131	3.9561	0.219784	2.19781	1.01658
ENSG00000131828	0.146522	1.90479	3.88284	0.146522	2.19682	1.01539
ENSG00000164209	0.219784	2.2711	4.68872	0.219784	2.19615	1.01475
ENSG00000137547	0.146522	1.83153	4.24915	0.146522	2.19363	1.01103
ENSG00000166266	0.219784	2.19784	4.39567	0.219784	2.19316	1.01072
ENSG00000183207	0.146522	2.12457	4.39567	0.146522	2.19192	1.01004
ENSG00000253719	0.146522	2.05131	4.46893	0.146522	2.19034	1.00787
ENSG00000143179	0.219784	2.19784	4.17589	0.219784	2.18615	1.0023
ENSG00000138760	0.146522	1.75827	3.29675	0.146522	2.1842	1.00107
ENSG00000136933	0.146522	2.12457	4.68872	0.146522	2.18388	1.00107
ENSG00000164465	0.219784	2.93045	4.83524	0.219784	2.18334	1.00085
ENSG00000143889	0.146522	2.05131	4.39567	0.146522	2.182	1.00046
ENSG00000085719	0.146522	1.90479	3.51654	0.146522	2.18169	1.00039
ENSG00000259250	0.219784	3.07697	4.10263	0.219784	2.18034	0.999062
ENSG00000105011	0.219784	2.56414	4.76198	0.219784	2.17931	0.99884
ENSG00000164073	0.219784	2.34436	5.20155	0.219784	2.17911	0.99884
ENSG00000104313	0.219784	2.93045	4.76198	0.219784	2.17803	0.99842
ENSG00000135476	0.219784	3.22349	4.39567	0.219784	2.17761	0.998391
ENSG00000065150	0.146522	2.12457	4.61546	0.146522	2.17746	0.998391
ENSG00000167670	0.219784	2.78393	4.61546	0.219784	2.17503	0.995251
ENSG00000180329	0.146522	2.2711	4.61546	0.146522	2.17445	0.994924
ENSG00000178074	0.146522	2.05131	4.24915	0.146522	2.17375	0.994924
ENSG00000129187	0.146522	2.05131	4.32241	0.146522	2.17341	0.994924
ENSG00000117640	0.219784	2.85719	4.61546	0.219784	2.17217	0.994924
ENSG00000112578	0.219784	3.07697	4.17589	0.219784	2.17149	0.994924
ENSG00000138686	0.146522	2.2711	5.05502	0.146522	2.1708	0.994924
ENSG00000137876	0.146522	1.75827	3.37002	0.146522	2.17052	0.994924
ENSG00000160783	0.146522	2.05131	4.39567	0.146522	2.17024	0.994924
ENSG00000132464	0.219784	3.15023	4.24915	0.219784	2.16994	0.994924
ENSG00000213390	0.219784	3.15023	4.46893	0.219784	2.16738	0.992935
ENSG00000124693	0.219784	3.07697	3.9561	0.219784	2.16679	0.992397
ENSG00000100105	0.219784	3.07697	4.17589	0.219784	2.16605	0.992071
ENSG00000204604	0.219784	3.15023	4.24915	0.219784	2.16532	0.99131
ENSG00000104497	0.219784	3.22349	4.54219	0.219784	2.16464	0.990628
ENSG00000138180	0.219784	2.85719	4.68872	0.219784	2.16295	0.989609
ENSG00000121892	0.146522	1.75827	3.5898	0.146522	2.1569	0.984463
ENSG00000215424	0.219784	3.00371	4.39567	0.219784	2.15522	0.983073
ENSG00000068885	0.219784	3.07697	4.17589	0.219784	2.1545	0.982818
ENSG00000159131	0.146522	1.97805	4.10263	0.146522	2.15344	0.982818
ENSG00000198862	0.146522	1.97805	4.32241	0.146522	2.15325	0.982818
ENSG00000138293	0.146522	1.83153	3.5898	0.146522	2.15241	0.982454
ENSG00000151503	0.146522	2.05131	5.20155	0.146522	2.15171	0.982454
ENSG00000161265	0.146522	2.34436	4.68872	0.146522	2.15098	0.982454
ENSG00000122783	0.146522	2.71066	4.46893	0.146522	2.1504	0.982454
ENSG00000114978	0.146522	1.83153	3.44328	0.146522	2.15025	0.982454
ENSG00000198901	0.146522	2.19784	4.61546	0.146522	2.15025	0.982454
ENSG00000109255	0.146522	2.2711	4.9085	0.146522	2.15013	0.982454
ENSG00000144554	0.146522	2.19784	5.42133	0.146522	2.14987	0.982454
ENSG00000162623	0.146522	2.56414	4.98176	0.146522	2.14825	0.980241
ENSG00000034693	0.146522	2.19784	4.68872	0.146522	2.14744	0.979769
ENSG00000035681	0.146522	2.2711	4.76198	0.146522	2.14605	0.978461
ENSG00000181610	0.146522	1.90479	4.24915	0.146522	2.14586	0.978461
ENSG00000164118	0.146522	2.34436	4.76198	0.146522	2.1426	0.976186
ENSG00000173418	0.146522	1.83153	3.51654	0.146522	2.14203	0.976045
ENSG00000109881	0.146522	2.56414	4.68872	0.146522	2.1404	0.974511
ENSG00000269973	0.219784	3.07697	4.10263	0.219784	2.14006	0.974511
ENSG00000070214	0.146522	1.90479	3.73632	0.146522	2.13908	0.973743
ENSG00000129810	0.146522	2.49088	4.54219	0.146522	2.13805	0.97331
ENSG00000168228	0.146522	3.15023	4.24915	0.146522	2.13801	0.97331
ENSG00000135249	0.146522	2.34436	4.83524	0.146522	2.13777	0.97331
ENSG00000198176	0.146522	2.34436	4.76198	0.146522	2.13403	0.96955
ENSG00000165733	0.0732612	1.83153	3.9561	0.0732612	2.13247	0.969275
ENSG00000163170	0.146522	2.12457	4.24915	0.146522	2.12888	0.965888
ENSG00000102595	0.146522	1.97805	4.54219	0.146522	2.12837	0.965866
ENSG00000004059	0.146522	2.49088	4.68872	0.146522	2.12537	0.963059
ENSG00000176055	0.146522	3.07697	4.17589	0.146522	2.12402	0.961254
ENSG00000197646	0.146522	3.07697	4.24915	0.146522	2.12342	0.960687
ENSG00000145495	0.146522	1.97805	3.51654	0.146522	2.12302	0.960453
ENSG00000112237	0.0732612	1.83153	3.5898	0.0732612	2.12201	0.960382
ENSG00000092140	0.146522	2.19784	4.83524	0.146522	2.12195	0.960382
ENSG00000211445	0.146522	2.6374	4.9085	0.146522	2.12074	0.959223
ENSG00000143149	0.146522	2.12457	5.8609	0.146522	2.11881	0.956879
ENSG00000146281	0.0732612	1.83153	4.02937	0.0732612	2.11784	0.956546
ENSG00000151929	0.146522	3.07697	4.39567	0.146522	2.11272	0.952024
ENSG00000164902	0.0732612	1.75827	3.9561	0.0732612	2.11231	0.952024
ENSG00000132664	0.146522	3.07697	4.10263	0.146522	2.11165	0.951615
ENSG00000160352	0.146522	3.07697	4.17589	0.146522	2.10846	0.949486
ENSG00000134049	0.0732612	1.83153	3.80958	0.0732612	2.10836	0.949486
ENSG00000196417	0.146522	2.6374	5.05502	0.146522	2.10781	0.949486
ENSG00000185950	0.146522	3.00371	4.10263	0.146522	2.10779	0.949486
ENSG00000136897	0.0732612	1.90479	4.10263	0.0732612	2.10573	0.94658
ENSG00000101868	0.146522	2.49088	4.76198	0.146522	2.10488	0.945586
ENSG00000057663	0.0732612	1.97805	4.68872	0.0732612	2.1037	0.944894
ENSG00000096092	0.0732612	1.83153	4.02937	0.0732612	2.10295	0.944478
ENSG00000169490	0.0732612	1.97805	5.20155	0.0732612	2.10015	0.940836
ENSG00000106560	0.146522	2.49088	4.61546	0.146522	2.09943	0.940836
ENSG00000175792	0.146522	2.19784	4.83524	0.146522	2.09863	0.940836
ENSG00000116750	0.0732612	1.83153	3.66306	0.0732612	2.09862	0.940836
ENSG00000114686	0.0732612	1.90479	4.02937	0.0732612	2.09664	0.939023
ENSG00000142632	0.146522	3.00371	3.9561	0.146522	2.09572	0.938538
ENSG00000064419	0.0732612	1.90479	4.10263	0.0732612	2.09559	0.938538
ENSG00000094841	0.146522	3.00371	4.32241	0.146522	2.09502	0.938039
ENSG00000104886	0.0732612	2.34436	4.9085	0.0732612	2.09439	0.938039
ENSG00000143183	0.0732612	1.75827	3.51654	0.0732612	2.09206	0.935848
ENSG00000126602	0.0732612	2.12457	4.61546	0.0732612	2.09197	0.935848
ENSG00000134014	0.0732612	2.05131	4.68872	0.0732612	2.0895	0.933405
ENSG00000104691	0.146522	2.85719	4.46893	0.146522	2.0877	0.932434
ENSG00000122483	0.0732612	2.56414	4.68872	0.0732612	2.08767	0.932434
ENSG00000177917	0.0732612	2.41762	4.83524	0.0732612	2.085	0.930469
ENSG00000113734	0.0732612	2.49088	4.46893	0.0732612	2.07893	0.922841
ENSG00000087448	0.0732612	2.56414	4.9085	0.0732612	2.07622	0.919539
ENSG00000049239	0.0732612	3.15023	4.10263	0.0732612	2.07386	0.916682
ENSG00000197798	0.0732612	3.15023	4.17589	0.0732612	2.07349	0.916657
ENSG00000182173	0.0732612	2.93045	3.88284	0.0732612	2.07072	0.912893
ENSG00000204650	0.0732612	3.00371	4.17589	0.0732612	2.06951	0.912893
ENSG00000111247	0.0732612	1.97805	5.34807	0.0732612	2.06904	0.912529
ENSG00000253738	0.0732612	1.75827	3.73632	0.0732612	2.06809	0.91146
ENSG00000104047	0.0732612	1.90479	4.32241	0.0732612	2.06791	0.91146
ENSG00000165661	0.0732612	2.93045	4.24915	0.0732612	2.06721	0.911028
ENSG00000172936	0.0732612	1.97805	5.34807	0.0732612	2.06669	0.911028
ENSG00000177058	0.0732612	2.12457	4.68872	0.0732612	2.06635	0.911028
ENSG00000145088	0.0732612	1.75827	3.66306	0.0732612	2.06551	0.91074
ENSG00000169047	0.0732612	2.56414	4.9085	0.0732612	2.06195	0.908848
ENSG00000132581	0.0732612	1.83153	3.9561	0.0732612	2.06051	0.907315
ENSG00000196954	0.0732612	1.83153	4.39567	0.0732612	2.05973	0.907172
ENSG00000177889	0.0732612	1.90479	3.66306	0.0732612	2.05631	0.903969
ENSG00000158850	0.0732612	1.75827	3.51654	0.0732612	2.05517	0.903367
ENSG00000228546	0.0732612	2.93045	3.88284	0.0732612	2.0548	0.903367
ENSG00000148459	0.0732612	2.85719	4.02937	0.0732612	2.05382	0.903046
ENSG00000163781	0.0732612	1.90479	4.17589	0.0732612	2.05258	0.901789
ENSG00000178605	0.0732612	2.93045	3.9561	0.0732612	2.05221	0.901581
ENSG00000125319	0.0732612	2.93045	4.02937	0.0732612	2.05175	0.901218
ENSG00000169087	0.0732612	2.19784	4.83524	0.0732612	2.04767	0.897224
ENSG00000029993	0.0732612	2.12457	4.54219	0.0732612	2.04683	0.896634
ENSG00000048028	0.0732612	1.97805	4.54219	0.0732612	2.0462	0.895985
ENSG00000119326	0.0732612	2.05131	4.83524	0.0732612	2.04581	0.895727
ENSG00000129195	0.0732612	2.93045	4.02937	0.0732612	2.04333	0.894003
ENSG00000143418	0.0732612	1.97805	4.10263	0.0732612	2.04136	0.891396
ENSG00000141293	0.0732612	2.34436	4.68872	0.0732612	2.04121	0.891396
ENSG00000037749	0.0732612	2.2711	5.34807	0.0732612	2.03993	0.890925
ENSG00000215712	0	1.90479	4.17589	0	2.03918	0.890714
ENSG00000111906	0	1.90479	4.10263	0	2.03812	0.890244
ENSG00000175324	0.0732612	2.12457	4.76198	0.0732612	2.03794	0.890244
ENSG00000119684	0.0732612	2.93045	3.9561	0.0732612	2.03772	0.890244
ENSG00000152990	0.0732612	2.71066	5.05502	0.0732612	2.03624	0.889752
ENSG00000126945	0	1.83153	3.88284	0	2.03413	0.887426
ENSG00000152464	0.0732612	2.56414	4.24915	0.0732612	2.03246	0.885667
ENSG00000128050	0	1.83153	3.51654	0	2.03232	0.885667
ENSG00000025039	0	1.83153	3.88284	0	2.03213	0.885667
ENSG00000114491	0	1.90479	4.46893	0	2.03109	0.885232
ENSG00000188419	0.0732612	2.34436	4.68872	0.0732612	2.031	0.885232
ENSG00000178966	0.0732612	3.00371	4.9085	0.0732612	2.03044	0.885232
ENSG00000172927	0.0732612	2.93045	3.9561	0.0732612	2.02976	0.884899
ENSG00000137161	0	1.75827	3.88284	0	2.02636	0.883059
ENSG00000141873	0.0732612	2.85719	3.88284	0.0732612	2.02582	0.883059
ENSG00000154930	0.0732612	2.6374	4.39567	0.0732612	2.02544	0.882813
ENSG00000109854	0	2.19784	4.61546	0	2.02482	0.882171
ENSG00000170791	0	1.97805	4.61546	0	2.02275	0.880021
ENSG00000110851	0	2.05131	4.61546	0	2.02212	0.880021
ENSG00000089060	0.0732612	2.93045	4.02937	0.0732612	2.02141	0.879229
ENSG00000146263	0	1.83153	3.66306	0	2.02008	0.878081
ENSG00000138629	0	2.05131	4.32241	0	2.01979	0.878081
ENSG00000185721	0	1.83153	4.02937	0	2.01941	0.877841
ENSG00000131400	0.0732612	3.00371	3.9561	0.0732612	2.01901	0.877563
ENSG00000112110	0	1.68501	3.51654	0	2.01826	0.877291
ENSG00000072501	0	1.83153	3.51654	0	2.01823	0.877291
ENSG00000113845	0	1.68501	4.02937	0	2.01794	0.877291
ENSG00000048162	0	1.83153	4.02937	0	2.01791	0.877291
ENSG00000076248	0	2.41762	4.61546	0	2.01596	0.874809
ENSG00000263002	0	2.93045	4.10263	0	2.0129	0.870858
ENSG00000167325	0	1.83153	4.10263	0	2.01263	0.870796
ENSG00000081791	0	1.90479	4.54219	0	2.01203	0.870577
ENSG00000136861	0	1.90479	4.32241	0	2.00939	0.868895
ENSG00000214717	0	2.85719	3.9561	0	2.0088	0.868301
ENSG00000149970	0	3.00371	4.24915	0	2.00831	0.868038
ENSG00000257698	0	2.56414	4.32241	0	2.00818	0.868038
ENSG00000136010	0	1.68501	3.80958	0	2.00707	0.867758
ENSG00000151304	0	1.97805	4.46893	0	2.00685	0.867758
ENSG00000133265	0	2.85719	3.88284	0	2.00299	0.86541
ENSG00000183605	0	1.83153	4.24915	0	2.00267	0.86541
ENSG00000246082	0	2.93045	4.02937	0	1.99973	0.861988
ENSG00000139354	0	2.93045	3.80958	0	1.9996	0.861988
ENSG00000101310	0	1.75827	3.5898	0	1.9992	0.861988
ENSG00000196290	0	1.90479	4.39567	0	1.99886	0.861988
ENSG00000106615	0	1.68501	3.51654	0	1.99852	0.861988
ENSG00000108826	0	1.83153	3.9561	0	1.99832	0.861988
ENSG00000169075	0	2.93045	4.02937	0	1.99687	0.860411
ENSG00000257267	0	2.05131	4.39567	0	1.99595	0.860411
ENSG00000186469	0	2.85719	3.88284	0	1.99479	0.859541
ENSG00000014914	0	2.71066	4.32241	0	1.99422	0.85921
ENSG00000174891	0	1.83153	4.02937	0	1.99414	0.85921
ENSG00000119403	0	2.05131	4.54219	0	1.99245	0.857569
ENSG00000156017	0	1.83153	4.17589	0	1.99222	0.857569
ENSG00000245556	0	2.85719	3.88284	0	1.99025	0.855904
ENSG00000138430	0	1.68501	3.66306	0	1.98948	0.855242
ENSG00000207501	0	2.85719	3.80958	0	1.98909	0.854959
ENSG00000105889	0	2.78393	3.88284	0	1.9883	0.854794
ENSG00000174007	0	2.05131	4.54219	0	1.98557	0.851592
ENSG00000125863	0	2.05131	4.39567	0	1.98475	0.850743
ENSG00000085274	0	1.75827	3.73632	0	1.98431	0.850385
ENSG00000135605	0	2.85719	4.02937	0	1.98256	0.847838
ENSG00000006468	0	1.90479	4.32241	0	1.9812	0.846631
ENSG00000164366	0	2.71066	4.32241	0	1.98116	0.846631
ENSG00000170089	0	2.56414	4.46893	0	1.97905	0.844988
ENSG00000159348	0	1.68501	4.10263	0	1.97841	0.844678
ENSG00000111684	0	1.97805	4.83524	0	1.9745	0.841396
ENSG00000156136	0	2.71066	4.32241	0	1.97447	0.841396
ENSG00000100629	0	1.83153	4.17589	0	1.97433	0.841396
ENSG00000106610	0	2.2711	4.68872	0	1.97389	0.841358
ENSG00000138297	0	1.75827	3.80958	0	1.97312	0.841123
ENSG00000177156	0	1.53849	3.5898	0	1.97265	0.84075
ENSG00000100983	0	2.34436	4.76198	0	1.97014	0.838757
ENSG00000121644	0	1.97805	4.61546	0	1.96765	0.835708
ENSG00000165275	0	2.6374	4.39567	0	1.96741	0.835674
ENSG00000132676	0	1.61175	3.51654	0	1.96559	0.83409
ENSG00000180581	0	2.05131	4.46893	0	1.96541	0.83409
ENSG00000103174	0	2.78393	3.80958	0	1.96512	0.83409
ENSG00000148700	0	1.68501	3.66306	0	1.96207	0.832242
ENSG00000127463	0	1.83153	4.02937	0	1.962	0.832242
ENSG00000052795	0	1.75827	5.64111	0	1.96168	0.83208
ENSG00000140854	-4.02937	-2.2711	-0.0732612	-0.0732612	-1.96105	-0.83176
ENSG00000165410	-3.51654	-1.75827	-0.0732612	-0.0732612	-1.96138	-0.831937
ENSG00000146859	-3.80958	-1.97805	-0.0732612	-0.0732612	-1.96209	-0.832242
ENSG00000166136	-3.37002	-1.68501	-0.0732612	-0.0732612	-1.96226	-0.832242
ENSG00000246422	-4.10263	-2.19784	-0.0732612	-0.0732612	-1.9624	-0.832242
ENSG00000156194	-4.17589	-2.05131	-0.0732612	-0.0732612	-1.96323	-0.832428
ENSG00000188042	-4.68872	-2.6374	-0.0732612	-0.0732612	-1.96341	-0.832428
ENSG00000182325	-4.61546	-2.56414	-0.0732612	-0.0732612	-1.96363	-0.832428
ENSG00000234962	-4.24915	-2.12457	-0.0732612	-0.0732612	-1.96448	-0.83339
ENSG00000114779	-4.24915	-2.2711	-0.0732612	-0.0732612	-1.96522	-0.83409
ENSG00000254887	-5.05502	-2.6374	-0.0732612	-0.0732612	-1.96615	-0.834316
ENSG00000120899	-3.29675	-1.61175	-0.0732612	-0.0732612	-1.96638	-0.834336
ENSG00000114805	-4.32241	-2.12457	-0.0732612	-0.0732612	-1.96767	-0.835708
ENSG00000232098	-4.02937	-2.05131	-0.0732612	-0.0732612	-1.96769	-0.835708
ENSG00000121413	-5.56785	-3.88284	-0.0732612	-0.0732612	-1.9702	-0.838757
ENSG00000260257	-3.66306	-1.83153	-0.0732612	-0.0732612	-1.97024	-0.838757
ENSG00000228925	-4.39567	-2.49088	-0.0732612	-0.0732612	-1.97072	-0.838757
ENSG00000239713	-3.66306	-1.83153	-0.0732612	-0.0732612	-1.97101	-0.838757
ENSG00000172020	-5.20155	-3.29675	-0.0732612	-0.0732612	-1.97245	-0.84075
ENSG00000135968	-3.51654	-1.68501	-0.0732612	-0.0732612	-1.97334	-0.841123
ENSG00000134046	-3.37002	-1.68501	-0.0732612	-0.0732612	-1.97372	-0.841358
ENSG00000155966	-5.8609	-3.66306	-0.0732612	-0.0732612	-1.97419	-0.841396
ENSG00000182318	-3.80958	-1.97805	-0.0732612	-0.0732612	-1.97499	-0.841396
ENSG00000232712	-4.32241	-2.34436	-0.0732612	-0.0732612	-1.97563	-0.841908
ENSG00000139631	-4.39567	-2.34436	-0.0732612	-0.0732612	-1.97591	-0.842009
ENSG00000103197	-4.32241	-2.34436	-0.0732612	-0.0732612	-1.97646	-0.842557
ENSG00000201610	-4.9085	-3.07697	-0.0732612	-0.0732612	-1.97672	-0.842598
ENSG00000004846	-5.27481	-3.5898	-0.0732612	-0.0732612	-1.97725	-0.843113
ENSG00000133519	-4.61546	-2.41762	-0.0732612	-0.0732612	-1.97858	-0.844678
ENSG00000146521	-4.76198	-2.6374	-0.0732612	-0.0732612	-1.97938	-0.845174
ENSG00000261270	-4.76198	-2.71066	-0.0732612	-0.0732612	-1.9796	-0.845174
ENSG00000254996	-4.68872	-2.6374	-0.0732612	-0.0732612	-1.9804	-0.846123
ENSG00000172985	-4.24915	-2.2711	-0.0732612	-0.0732612	-1.98066	-0.846169
ENSG00000162896	-4.61546	-2.49088	-0.0732612	-0.0732612	-1.98208	-0.847419
ENSG00000078369	-3.37002	-1.68501	-0.0732612	-0.0732612	-1.98548	-0.851592
ENSG00000182054	-3.80958	-1.90479	-0.0732612	-0.0732612	-1.98576	-0.851592
ENSG00000266821	-4.17589	-2.12457	-0.0732612	-0.0732612	-1.98695	-0.852905
ENSG00000108352	-7.03308	-5.27481	-0.0732612	-0.0732612	-1.98832	-0.854794
ENSG00000115902	-3.73632	-1.68501	-0.0732612	-0.0732612	-1.98849	-0.854794
ENSG00000022567	-4.39567	-2.34436	-0.0732612	-0.0732612	-1.99011	-0.855904
ENSG00000167578	-4.10263	-2.19784	-0.0732612	-0.0732612	-1.99036	-0.855904
ENSG00000267906	-4.54219	-2.49088	-0.0732612	-0.0732612	-1.9913	-0.856757
ENSG00000006831	-3.80958	-1.97805	-0.0732612	-0.0732612	-1.99201	-0.857569
ENSG00000138166	-3.51654	-1.68501	-0.0732612	-0.0732612	-1.99278	-0.857702
ENSG00000183864	-3.5898	-1.83153	-0.0732612	-0.0732612	-1.9936	-0.858689
ENSG00000078699	-3.66306	-1.90479	-0.0732612	-0.0732612	-1.99512	-0.859699
ENSG00000249859	-3.80958	-2.05131	-0.0732612	-0.0732612	-1.99577	-0.860411
ENSG00000149806	-3.15023	-1.46522	-0.0732612	-0.0732612	-1.99615	-0.860411
ENSG00000177200	-3.73632	-1.75827	-0.0732612	-0.0732612	-1.99625	-0.860411
ENSG00000152078	-5.49459	-3.22349	-0.0732612	-0.0732612	-1.9966	-0.860411
ENSG00000089169	-4.68872	-2.6374	-0.0732612	-0.0732612	-1.99734	-0.860726
ENSG00000100422	-3.66306	-1.90479	-0.0732612	-0.0732612	-1.99857	-0.861988
ENSG00000244256	-4.98176	-3.15023	-0.0732612	-0.0732612	-1.99865	-0.861988
ENSG00000174898	-4.32241	-2.19784	-0.0732612	-0.0732612	-2.00068	-0.862844
ENSG00000007933	-4.76198	-3.00371	-0.0732612	-0.0732612	-2.00096	-0.86293
ENSG00000100077	-3.9561	-2.12457	-0.0732612	-0.0732612	-2.0027	-0.86541
ENSG00000264458	-4.83524	-2.93045	-0.0732612	-0.0732612	-2.00312	-0.86541
ENSG00000228000	-5.78763	-4.02937	-0.0732612	-0.0732612	-2.0032	-0.86541
ENSG00000148400	-4.61546	-2.56414	-0.0732612	-0.0732612	-2.00351	-0.86541
ENSG00000159640	-4.46893	-2.41762	-0.0732612	-0.0732612	-2.00395	-0.86541
ENSG00000133466	-4.68872	-2.6374	-0.0732612	-0.0732612	-2.00435	-0.865508
ENSG00000216863	-5.20155	-3.00371	-0.146522	-0.146522	-2.00473	-0.865757
ENSG00000241956	-3.66306	-1.97805	-0.0732612	-0.0732612	-2.00475	-0.865757
ENSG00000231665	-4.68872	-2.78393	-0.0732612	-0.0732612	-2.00536	-0.866032
ENSG00000226026	-4.76198	-2.78393	-0.0732612	-0.0732612	-2.00538	-0.866032
ENSG00000183826	-3.88284	-2.05131	-0.0732612	-0.0732612	-2.00688	-0.867758
ENSG00000135916	-3.5898	-1.68501	-0.0732612	-0.0732612	-2.00693	-0.867758
ENSG00000155085	-3.73632	-1.97805	-0.0732612	-0.0732612	-2.00742	-0.867758
ENSG00000109906	-6.81329	-4.76198	-0.146522	-0.146522	-2.00963	-0.868903
ENSG00000099991	-4.17589	-2.12457	-0.0732612	-0.0732612	-2.00968	-0.868903
ENSG00000012779	-3.80958	-1.90479	-0.0732612	-0.0732612	-2.00972	-0.868903
ENSG00000172716	-4.39567	-2.41762	-0.0732612	-0.0732612	-2.00994	-0.868903
ENSG00000170919	-4.02937	-2.12457	-0.0732612	-0.0732612	-2.01035	-0.868903
ENSG00000197497	-4.61546	-2.56414	-0.0732612	-0.0732612	-2.01143	-0.869965
ENSG00000178809	-3.9561	-2.05131	-0.0732612	-0.0732612	-2.01236	-0.870736
ENSG00000270387	-5.42133	-3.5898	-0.0732612	-0.0732612	-2.01341	-0.871325
ENSG00000188522	-4.9085	-2.85719	-0.146522	-0.146522	-2.01427	-0.872379
ENSG00000214274	-3.66306	-1.83153	-0.0732612	-0.0732612	-2.01693	-0.876036
ENSG00000238035	-4.68872	-2.56414	-0.0732612	-0.0732612	-2.01979	-0.878081
ENSG00000133112	-3.22349	-1.53849	-0.0732612	-0.0732612	-2.02075	-0.878513
ENSG00000272669	-4.46893	-2.49088	-0.146522	-0.146522	-2.02227	-0.880021
ENSG00000114554	-4.32241	-2.34436	-0.0732612	-0.0732612	-2.02245	-0.880021
ENSG00000115756	-3.73632	-1.83153	-0.0732612	-0.0732612	-2.02258	-0.880021
ENSG00000038219	-3.5898	-1.68501	-0.0732612	-0.0732612	-2.02381	-0.880879
ENSG00000102290	-4.54219	-2.49088	-0.146522	-0.146522	-2.02584	-0.883059
ENSG00000137955	-3.73632	-1.90479	-0.0732612	-0.0732612	-2.02604	-0.883059
ENSG00000140992	-3.9561	-2.12457	-0.146522	-0.146522	-2.02683	-0.883156
ENSG00000069020	-4.83524	-2.93045	-0.146522	-0.146522	-2.02712	-0.883248
ENSG00000121104	-4.76198	-2.56414	-0.146522	-0.146522	-2.02729	-0.883248
ENSG00000121964	-4.17589	-2.34436	-0.146522	-0.146522	-2.02767	-0.883375
ENSG00000149823	-4.10263	-2.19784	-0.146522	-0.146522	-2.02857	-0.884485
ENSG00000163632	-4.98176	-3.15023	-0.0732612	-0.0732612	-2.02905	-0.884899
ENSG00000105392	-3.66306	-1.83153	-0.0732612	-0.0732612	-2.02912	-0.884899
ENSG00000013293	-4.9085	-2.93045	-0.146522	-0.146522	-2.02947	-0.884899
ENSG00000251682	-5.05502	-3.07697	-0.146522	-0.146522	-2.02995	-0.884899
ENSG00000188672	-4.76198	-2.78393	-0.146522	-0.146522	-2.03048	-0.885232
ENSG00000164695	-5.05502	-2.85719	-0.146522	-0.146522	-2.03074	-0.885232
ENSG00000249948	-5.05502	-3.07697	-0.146522	-0.146522	-2.03137	-0.885232
ENSG00000101363	-4.46893	-2.49088	-0.146522	-0.146522	-2.03292	-0.885804
ENSG00000173486	-3.29675	-1.53849	-0.0732612	-0.0732612	-2.03483	-0.888201
ENSG00000104848	-4.39567	-2.34436	-0.146522	-0.146522	-2.03537	-0.888695
ENSG00000143498	-4.83524	-2.78393	-0.146522	-0.146522	-2.03654	-0.889869
ENSG00000133318	-3.37002	-1.61175	-0.0732612	-0.0732612	-2.03668	-0.889869
ENSG00000245156	-3.9561	-2.12457	-0.146522	-0.146522	-2.03675	-0.889869
ENSG00000038532	-4.54219	-2.56414	-0.146522	-0.146522	-2.03737	-0.890047
ENSG00000135587	-4.61546	-2.56414	-0.146522	-0.146522	-2.03862	-0.890539
ENSG00000109762	-3.9561	-2.05131	-0.146522	-0.146522	-2.03896	-0.890714
ENSG00000174469	-5.05502	-2.78393	-0.146522	-0.146522	-2.03926	-0.890714
ENSG00000228079	-4.61546	-2.6374	-0.146522	-0.146522	-2.03981	-0.890925
ENSG00000240040	-4.83524	-2.85719	-0.146522	-0.146522	-2.04052	-0.891315
ENSG00000198919	-4.76198	-2.71066	-0.146522	-0.146522	-2.04081	-0.891396
ENSG00000168209	-3.88284	-2.12457	-0.146522	-0.146522	-2.04086	-0.891396
ENSG00000207036	-4.76198	-2.78393	-0.146522	-0.146522	-2.04352	-0.894003
ENSG00000155749	-5.34807	-3.22349	-0.219784	-0.219784	-2.04374	-0.894003
ENSG00000165280	-3.5898	-1.75827	-0.0732612	-0.0732612	-2.04442	-0.89462
ENSG00000128923	-3.73632	-2.05131	-0.146522	-0.146522	-2.04465	-0.89462
ENSG00000176485	-3.44328	-1.68501	-0.0732612	-0.0732612	-2.04527	-0.895235
ENSG00000165555	-6.00742	-4.02937	-0.146522	-0.146522	-2.047	-0.896634
ENSG00000235613	-5.64111	-3.22349	-0.219784	-0.219784	-2.0483	-0.897879
ENSG00000235262	-4.61546	-2.49088	-0.146522	-0.146522	-2.04894	-0.898539
ENSG00000111145	-3.51654	-1.68501	-0.146522	-0.146522	-2.04925	-0.898654
ENSG00000163660	-3.51654	-1.68501	-0.0732612	-0.0732612	-2.04958	-0.898806
ENSG00000263570	-5.27481	-2.85719	-0.146522	-0.146522	-2.04985	-0.898848
ENSG00000197746	-3.37002	-1.61175	-0.0732612	-0.0732612	-2.0505	-0.899536
ENSG00000120306	-3.44328	-1.75827	-0.146522	-0.146522	-2.0535	-0.902917
ENSG00000184545	-4.76198	-2.71066	-0.146522	-0.146522	-2.05425	-0.903367
ENSG00000227009	-4.83524	-2.71066	-0.146522	-0.146522	-2.0544	-0.903367
ENSG00000188511	-4.46893	-2.49088	-0.0732612	-0.0732612	-2.05461	-0.903367
ENSG00000214629	-4.98176	-3.22349	-0.146522	-0.146522	-2.05473	-0.903367
ENSG00000070366	-4.68872	-2.71066	-0.146522	-0.146522	-2.0557	-0.903367
ENSG00000163931	-3.51654	-1.75827	-0.146522	-0.146522	-2.05783	-0.906096
ENSG00000169564	-3.29675	-1.61175	-0.146522	-0.146522	-2.05798	-0.906096
ENSG00000040199	-4.46893	-2.41762	-0.146522	-0.146522	-2.0586	-0.906568
ENSG00000106624	-4.02937	-2.12457	-0.146522	-0.146522	-2.05915	-0.907072
ENSG00000264933	-4.46893	-2.41762	-0.146522	-0.146522	-2.05945	-0.907172
ENSG00000185129	-3.80958	-1.97805	-0.146522	-0.146522	-2.05954	-0.907172
ENSG00000236438	-4.32241	-2.12457	-0.0732612	-0.0732612	-2.06023	-0.907249
ENSG00000119778	-3.9561	-2.12457	-0.146522	-0.146522	-2.06088	-0.907512
ENSG00000240535	-4.61546	-2.49088	-0.146522	-0.146522	-2.06192	-0.908848
ENSG00000135924	-4.76198	-2.6374	-0.146522	-0.146522	-2.06204	-0.908848
ENSG00000134539	-5.20155	-3.29675	-0.146522	-0.146522	-2.06213	-0.908848
ENSG00000126432	-3.29675	-1.53849	-0.146522	-0.146522	-2.06262	-0.908848
ENSG00000160613	-3.73632	-1.83153	-0.146522	-0.146522	-2.06285	-0.908848
ENSG00000172081	-3.44328	-1.61175	-0.146522	-0.146522	-2.06289	-0.908848
ENSG00000089558	-4.83524	-2.85719	-0.146522	-0.146522	-2.06331	-0.908848
ENSG00000203865	-4.9085	-3.07697	-0.146522	-0.146522	-2.06354	-0.908848
ENSG00000112561	-5.12828	-3.07697	-0.219784	-0.219784	-2.06481	-0.909983
ENSG00000168679	-4.76198	-2.71066	-0.146522	-0.146522	-2.06578	-0.910791
ENSG00000198932	-6.2272	-4.39567	-0.146522	-0.146522	-2.06617	-0.911028
ENSG00000167106	-4.17589	-2.34436	-0.146522	-0.146522	-2.06645	-0.911028
ENSG00000140941	-3.66306	-1.83153	-0.146522	-0.146522	-2.0671	-0.911028
ENSG00000179833	-4.17589	-2.19784	-0.146522	-0.146522	-2.06966	-0.912893
ENSG00000100612	-3.44328	-1.75827	-0.146522	-0.146522	-2.06969	-0.912893
ENSG00000124074	-4.68872	-2.71066	-0.146522	-0.146522	-2.06972	-0.912893
ENSG00000215193	-3.73632	-1.90479	-0.146522	-0.146522	-2.07045	-0.912893
ENSG00000224078	-3.9561	-2.12457	-0.146522	-0.146522	-2.07205	-0.914669
ENSG00000248476	-6.30046	-4.10263	-0.219784	-0.219784	-2.07375	-0.916682
ENSG00000230528	-5.71437	-3.88284	-0.219784	-0.219784	-2.07564	-0.919014
ENSG00000133106	-4.10263	-2.2711	-0.146522	-0.146522	-2.07621	-0.919539
ENSG00000157106	-3.44328	-1.61175	-0.146522	-0.146522	-2.07764	-0.921106
ENSG00000178607	-3.37002	-1.61175	-0.146522	-0.146522	-2.07971	-0.923736
ENSG00000130775	-3.44328	-1.83153	-0.146522	-0.146522	-2.07972	-0.923736
ENSG00000060491	-4.68872	-2.49088	-0.219784	-0.219784	-2.08005	-0.923736
ENSG00000163545	-4.02937	-2.19784	-0.146522	-0.146522	-2.08289	-0.927796
ENSG00000233750	-4.61546	-2.6374	-0.219784	-0.219784	-2.08443	-0.929937
ENSG00000269930	-4.61546	-2.6374	-0.146522	-0.146522	-2.085	-0.930469
ENSG00000233276	-3.5898	-1.83153	-0.146522	-0.146522	-2.08501	-0.930469
ENSG00000090975	-4.98176	-3.07697	-0.219784	-0.219784	-2.08529	-0.930469
ENSG00000115165	-3.5898	-1.75827	-0.146522	-0.146522	-2.08701	-0.93216
ENSG00000225746	-5.64111	-3.80958	-0.219784	-0.219784	-2.08705	-0.93216
ENSG00000123094	-5.27481	-3.44328	-0.219784	-0.219784	-2.08853	-0.933036
ENSG00000204592	-3.66306	-1.75827	-0.146522	-0.146522	-2.08857	-0.933036
ENSG00000160570	-4.02937	-2.12457	-0.146522	-0.146522	-2.08894	-0.933036
ENSG00000270061	-5.27481	-3.29675	-0.293045	-0.293045	-2.09026	-0.934243
ENSG00000254843	-4.61546	-2.6374	-0.146522	-0.146522	-2.09029	-0.934243
ENSG00000253490	-4.9085	-2.93045	-0.219784	-0.219784	-2.09074	-0.934243
ENSG00000268816	-5.64111	-3.80958	-0.293045	-0.293045	-2.09379	-0.938039
ENSG00000257438	-4.68872	-2.56414	-0.219784	-0.219784	-2.0938	-0.938039
ENSG00000236936	-4.83524	-2.78393	-0.219784	-0.219784	-2.09386	-0.938039
ENSG00000105835	-3.66306	-1.83153	-0.146522	-0.146522	-2.0945	-0.938039
ENSG00000104856	-3.66306	-1.97805	-0.146522	-0.146522	-2.09592	-0.938538
ENSG00000203489	-5.05502	-2.93045	-0.219784	-0.219784	-2.09798	-0.940836
ENSG00000095066	-4.68872	-2.78393	-0.219784	-0.219784	-2.09801	-0.940836
ENSG00000266475	-4.68872	-2.6374	-0.219784	-0.219784	-2.09823	-0.940836
ENSG00000230872	-4.39567	-2.41762	-0.219784	-0.219784	-2.09913	-0.940836
ENSG00000258486	-4.39567	-2.41762	-0.219784	-0.219784	-2.09935	-0.940836
ENSG00000130396	-4.39567	-2.34436	-0.219784	-0.219784	-2.09995	-0.940836
ENSG00000272283	-4.68872	-2.78393	-0.219784	-0.219784	-2.10099	-0.941649
ENSG00000163686	-5.42133	-2.71066	-0.293045	-0.293045	-2.10302	-0.944478
ENSG00000259485	-4.83524	-2.78393	-0.219784	-0.219784	-2.10393	-0.944894
ENSG00000167765	-4.10263	-2.19784	-0.219784	-0.219784	-2.10442	-0.945245
ENSG00000129675	-4.76198	-2.78393	-0.293045	-0.293045	-2.10773	-0.949486
ENSG00000174886	-3.51654	-1.83153	-0.146522	-0.146522	-2.10793	-0.949486
ENSG00000105612	-3.66306	-1.97805	-0.146522	-0.146522	-2.10795	-0.949486
ENSG00000149054	-4.54219	-2.56414	-0.219784	-0.219784	-2.10841	-0.949486
ENSG00000249731	-3.80958	-1.97805	-0.146522	-0.146522	-2.10857	-0.949486
ENSG00000266171	-4.61546	-2.6374	-0.146522	-0.146522	-2.11084	-0.950846
ENSG00000125354	-3.5898	-1.75827	-0.146522	-0.146522	-2.11155	-0.951615
ENSG00000245275	-4.83524	-2.78393	-0.293045	-0.293045	-2.11236	-0.952024
ENSG00000249096	-4.39567	-2.41762	-0.219784	-0.219784	-2.11308	-0.952026
ENSG00000141867	-3.51654	-1.83153	-0.146522	-0.146522	-2.11369	-0.952616
ENSG00000156804	-4.39567	-2.34436	-0.219784	-0.219784	-2.1145	-0.953547
ENSG00000106012	-4.61546	-2.49088	-0.219784	-0.219784	-2.11456	-0.953547
ENSG00000109787	-3.66306	-1.83153	-0.146522	-0.146522	-2.11479	-0.953547
ENSG00000197279	-4.54219	-2.56414	-0.219784	-0.219784	-2.11513	-0.953547
ENSG00000109046	-3.5898	-1.75827	-0.146522	-0.146522	-2.11529	-0.953547
ENSG00000179134	-3.9561	-2.12457	-0.219784	-0.219784	-2.11576	-0.953547
ENSG00000067082	-3.88284	-1.90479	-0.146522	-0.146522	-2.11786	-0.956546
ENSG00000184414	-5.20155	-3.07697	-0.293045	-0.293045	-2.11833	-0.956546
ENSG00000181555	-3.66306	-1.83153	-0.146522	-0.146522	-2.11969	-0.957901
ENSG00000224660	-4.83524	-2.71066	-0.219784	-0.219784	-2.1209	-0.959223
ENSG00000163874	-4.32241	-2.34436	-0.219784	-0.219784	-2.12204	-0.960382
ENSG00000090863	-3.73632	-1.90479	-0.146522	-0.146522	-2.12239	-0.960382
ENSG00000167461	-3.44328	-1.68501	-0.146522	-0.146522	-2.12677	-0.96497
ENSG00000183570	-4.54219	-2.56414	-0.219784	-0.219784	-2.12687	-0.96497
ENSG00000129353	-3.9561	-2.05131	-0.219784	-0.219784	-2.12696	-0.96497
ENSG00000117410	-3.37002	-1.61175	-0.146522	-0.146522	-2.12809	-0.965866
ENSG00000202290	-4.68872	-2.78393	-0.146522	-0.146522	-2.12824	-0.965866
ENSG00000237767	-3.66306	-1.97805	-0.219784	-0.219784	-2.12978	-0.96695
ENSG00000228817	-4.98176	-2.93045	-0.293045	-0.293045	-2.12984	-0.96695
ENSG00000111012	-6.15394	-4.10263	-0.293045	-0.293045	-2.13025	-0.96695
ENSG00000178104	-3.80958	-2.05131	-0.219784	-0.219784	-2.13092	-0.96755
ENSG00000164442	-4.39567	-2.49088	-0.219784	-0.219784	-2.13138	-0.967885
ENSG00000155093	-4.9085	-3.15023	-0.293045	-0.293045	-2.1329	-0.96955
ENSG00000134824	-5.05502	-2.85719	-0.219784	-0.219784	-2.133	-0.96955
ENSG00000176973	-4.17589	-2.2711	-0.219784	-0.219784	-2.13317	-0.96955
ENSG00000111860	-5.20155	-2.93045	-0.219784	-0.219784	-2.13331	-0.96955
ENSG00000260686	-4.68872	-2.71066	-0.219784	-0.219784	-2.13387	-0.96955
ENSG00000167658	-3.44328	-1.68501	-0.146522	-0.146522	-2.13464	-0.969849
ENSG00000169908	-5.49459	-3.00371	-0.293045	-0.293045	-2.13637	-0.972284
ENSG00000119408	-4.68872	-2.6374	-0.293045	-0.293045	-2.13642	-0.972284
ENSG00000211451	-4.39567	-2.49088	-0.219784	-0.219784	-2.13689	-0.972284
ENSG00000210082	-4.10263	-2.12457	-0.219784	-0.219784	-2.13842	-0.97331
ENSG00000163386	-3.44328	-1.75827	-0.146522	-0.146522	-2.1392	-0.973743
ENSG00000143384	-3.66306	-1.75827	-0.146522	-0.146522	-2.14008	-0.974511
ENSG00000255733	-4.24915	-2.34436	-0.219784	-0.219784	-2.14118	-0.975068
ENSG00000110921	-5.20155	-2.85719	-0.293045	-0.293045	-2.14238	-0.976186
ENSG00000228474	-3.22349	-1.61175	-0.146522	-0.146522	-2.14316	-0.97661
ENSG00000130787	-4.68872	-2.71066	-0.219784	-0.219784	-2.14325	-0.97661
ENSG00000234444	-4.54219	-2.6374	-0.293045	-0.293045	-2.14367	-0.97661
ENSG00000229417	-4.98176	-3.00371	-0.293045	-0.293045	-2.14444	-0.97742
ENSG00000173120	-3.51654	-1.75827	-0.219784	-0.219784	-2.14454	-0.97742
ENSG00000133131	-3.51654	-1.75827	-0.219784	-0.219784	-2.14503	-0.977529
ENSG00000111319	-4.9085	-2.85719	-0.293045	-0.293045	-2.14648	-0.978622
ENSG00000061676	-4.76198	-2.56414	-0.293045	-0.293045	-2.1479	-0.980107
ENSG00000268568	-4.54219	-2.56414	-0.293045	-0.293045	-2.14985	-0.982454
ENSG00000134533	-3.88284	-2.12457	-0.219784	-0.219784	-2.15063	-0.982454
ENSG00000107957	-4.83524	-2.85719	-0.293045	-0.293045	-2.1512	-0.982454
ENSG00000265150	-5.34807	-3.22349	-0.366306	-0.366306	-2.15177	-0.982454
ENSG00000163346	-3.44328	-1.68501	-0.219784	-0.219784	-2.15338	-0.982818
ENSG00000187010	-4.39567	-2.41762	-0.219784	-0.219784	-2.15368	-0.982818
ENSG00000157542	-4.10263	-2.2711	-0.219784	-0.219784	-2.15384	-0.982818
ENSG00000264194	-4.24915	-2.34436	-0.219784	-0.219784	-2.155	-0.983073
ENSG00000145912	-3.37002	-1.68501	-0.219784	-0.219784	-2.15501	-0.983073
ENSG00000188738	-3.80958	-1.97805	-0.219784	-0.219784	-2.15545	-0.983073
ENSG00000227394	-5.20155	-3.22349	-0.293045	-0.293045	-2.15764	-0.985235
ENSG00000207185	-4.9085	-3.00371	-0.219784	-0.219784	-2.15771	-0.985235
ENSG00000177410	-3.51654	-1.68501	-0.219784	-0.219784	-2.1579	-0.985235
ENSG00000223709	-4.17589	-2.2711	-0.293045	-0.293045	-2.15794	-0.985235
ENSG00000116731	-3.51654	-1.75827	-0.219784	-0.219784	-2.16002	-0.987414
ENSG00000138587	-5.20155	-3.29675	-0.366306	-0.366306	-2.16008	-0.987414
ENSG00000206579	-4.98176	-2.78393	-0.293045	-0.293045	-2.16057	-0.987444
ENSG00000109686	-4.98176	-2.93045	-0.366306	-0.366306	-2.16062	-0.987444
ENSG00000054654	-3.80958	-1.90479	-0.219784	-0.219784	-2.16084	-0.987444
ENSG00000125733	-4.54219	-2.6374	-0.293045	-0.293045	-2.16089	-0.987444
ENSG00000169432	-4.39567	-2.2711	-0.293045	-0.293045	-2.16299	-0.989609
ENSG00000148053	-4.68872	-2.56414	-0.293045	-0.293045	-2.16364	-0.989851
ENSG00000142784	-5.34807	-3.15023	-0.293045	-0.293045	-2.16406	-0.990111
ENSG00000236540	-4.61546	-2.6374	-0.293045	-0.293045	-2.1665	-0.992371
ENSG00000141551	-3.66306	-1.97805	-0.219784	-0.219784	-2.16787	-0.993307
ENSG00000104365	-4.32241	-2.41762	-0.293045	-0.293045	-2.16845	-0.993817
ENSG00000104783	-4.46893	-2.49088	-0.293045	-0.293045	-2.16848	-0.993817
ENSG00000111801	-5.56785	-3.44328	-0.366306	-0.366306	-2.16889	-0.993817
ENSG00000160991	-3.44328	-1.75827	-0.219784	-0.219784	-2.16993	-0.994924
ENSG00000137824	-3.73632	-1.97805	-0.219784	-0.219784	-2.17009	-0.994924
ENSG00000137200	-4.39567	-2.49088	-0.293045	-0.293045	-2.17046	-0.994924
ENSG00000106799	-4.32241	-2.41762	-0.293045	-0.293045	-2.17115	-0.994924
ENSG00000125633	-4.17589	-2.19784	-0.293045	-0.293045	-2.17135	-0.994924
ENSG00000110090	-3.66306	-1.90479	-0.219784	-0.219784	-2.17193	-0.994924
ENSG00000256705	-5.12828	-3.15023	-0.366306	-0.366306	-2.17251	-0.994924
ENSG00000167861	-4.17589	-2.2711	-0.293045	-0.293045	-2.17299	-0.994924
ENSG00000116205	-4.83524	-2.78393	-0.366306	-0.366306	-2.17355	-0.994924
ENSG00000196821	-3.44328	-1.75827	-0.219784	-0.219784	-2.17686	-0.997841
ENSG00000164406	-4.68872	-2.78393	-0.293045	-0.293045	-2.17826	-0.99842
ENSG00000143641	-4.02937	-2.12457	-0.293045	-0.293045	-2.17862	-0.998492
ENSG00000100934	-3.73632	-1.90479	-0.219784	-0.219784	-2.17946	-0.99884
ENSG00000159202	-3.5898	-1.90479	-0.219784	-0.219784	-2.17985	-0.99884
ENSG00000184428	-5.05502	-2.93045	-0.366306	-0.366306	-2.18129	-1.00019
ENSG00000174032	-4.32241	-2.34436	-0.293045	-0.293045	-2.18221	-1.00046
ENSG00000203387	-5.12828	-2.93045	-0.293045	-0.293045	-2.18245	-1.00046
ENSG00000146433	-4.54219	-2.56414	-0.293045	-0.293045	-2.18272	-1.00046
ENSG00000204120	-3.66306	-1.90479	-0.219784	-0.219784	-2.18375	-1.00107
ENSG00000215146	-5.05502	-3.07697	-0.366306	-0.366306	-2.18487	-1.00155
ENSG00000137501	-4.68872	-2.78393	-0.366306	-0.366306	-2.18543	-1.00202
ENSG00000182606	-3.88284	-2.12457	-0.219784	-0.219784	-2.18572	-1.00204
ENSG00000176438	-4.83524	-2.71066	-0.366306	-0.366306	-2.18637	-1.0023
ENSG00000223779	-4.76198	-2.71066	-0.293045	-0.293045	-2.1899	-1.0076
ENSG00000128973	-4.02937	-2.2711	-0.293045	-0.293045	-2.19256	-1.01064
ENSG00000103335	-4.17589	-2.2711	-0.293045	-0.293045	-2.19286	-1.01067
ENSG00000243094	-5.12828	-3.22349	-0.366306	-0.366306	-2.19834	-1.01658
ENSG00000154263	-5.78763	-3.9561	-0.512828	-0.512828	-2.19838	-1.01658
ENSG00000161016	-3.44328	-1.68501	-0.219784	-0.219784	-2.19849	-1.01658
ENSG00000138642	-4.98176	-2.85719	-0.366306	-0.366306	-2.19949	-1.01658
ENSG00000100647	-3.66306	-1.90479	-0.219784	-0.219784	-2.19967	-1.01658
ENSG00000100300	-3.73632	-1.97805	-0.219784	-0.219784	-2.2001	-1.01658
ENSG00000197019	-4.46893	-2.56414	-0.366306	-0.366306	-2.20306	-1.01797
ENSG00000186395	-4.32241	-2.41762	-0.293045	-0.293045	-2.20493	-1.02002
ENSG00000162688	-5.49459	-3.15023	-0.439567	-0.439567	-2.2099	-1.02547
ENSG00000258581	-4.17589	-2.41762	-0.293045	-0.293045	-2.2108	-1.02603
ENSG00000185803	-4.39567	-2.49088	-0.293045	-0.293045	-2.21102	-1.02603
ENSG00000173039	-3.66306	-2.05131	-0.293045	-0.293045	-2.21143	-1.02613
ENSG00000117298	-3.66306	-1.83153	-0.219784	-0.219784	-2.21262	-1.02762
ENSG00000261355	-4.83524	-3.07697	-0.219784	-0.219784	-2.21298	-1.02777
ENSG00000106537	-5.05502	-2.93045	-0.512828	-0.512828	-2.21417	-1.02926
ENSG00000128487	-3.73632	-1.97805	-0.293045	-0.293045	-2.21749	-1.03428
ENSG00000267834	-3.88284	-2.12457	-0.293045	-0.293045	-2.21822	-1.0344
ENSG00000168614	-3.66306	-1.83153	-0.219784	-0.219784	-2.22064	-1.03622
ENSG00000167202	-4.46893	-2.41762	-0.293045	-0.293045	-2.22124	-1.03675
ENSG00000148219	-3.73632	-1.97805	-0.293045	-0.293045	-2.22145	-1.03675
ENSG00000161912	-5.42133	-3.22349	-0.439567	-0.439567	-2.22166	-1.03675
ENSG00000106948	-4.10263	-2.19784	-0.293045	-0.293045	-2.22203	-1.03675
ENSG00000167548	-4.24915	-2.2711	-0.293045	-0.293045	-2.22244	-1.03675
ENSG00000100354	-3.5898	-1.75827	-0.219784	-0.219784	-2.22356	-1.03728
ENSG00000234393	-5.42133	-3.66306	-0.659351	-0.659351	-2.22367	-1.03728
ENSG00000100345	-3.5898	-1.83153	-0.219784	-0.219784	-2.22445	-1.03781
ENSG00000229833	-3.5898	-1.90479	-0.293045	-0.293045	-2.22493	-1.03809
ENSG00000133026	-4.61546	-2.49088	-0.366306	-0.366306	-2.22816	-1.04062
ENSG00000087460	-3.66306	-1.83153	-0.219784	-0.219784	-2.22825	-1.04062
ENSG00000100055	-3.88284	-2.12457	-0.293045	-0.293045	-2.22886	-1.04062
ENSG00000273274	-4.10263	-2.2711	-0.293045	-0.293045	-2.22911	-1.04062
ENSG00000077348	-3.44328	-1.68501	-0.219784	-0.219784	-2.2298	-1.04096
ENSG00000172270	-3.44328	-1.75827	-0.219784	-0.219784	-2.23064	-1.04188
ENSG00000237414	-4.76198	-2.78393	-0.366306	-0.366306	-2.2309	-1.04188
ENSG00000189423	-5.20155	-3.15023	-0.439567	-0.439567	-2.23243	-1.04198
ENSG00000151883	-3.80958	-2.12457	-0.293045	-0.293045	-2.23312	-1.04265
ENSG00000136044	-4.02937	-2.2711	-0.293045	-0.293045	-2.23554	-1.04617
ENSG00000169203	-4.76198	-2.78393	-0.366306	-0.366306	-2.23671	-1.04763
ENSG00000160584	-3.80958	-1.97805	-0.293045	-0.293045	-2.23749	-1.04843
ENSG00000046651	-3.9561	-2.05131	-0.293045	-0.293045	-2.23861	-1.04981
ENSG00000168066	-3.66306	-1.90479	-0.293045	-0.293045	-2.23876	-1.04981
ENSG00000231925	-3.80958	-1.90479	-0.293045	-0.293045	-2.23967	-1.05011
ENSG00000162227	-4.83524	-2.71066	-0.293045	-0.293045	-2.24287	-1.05444
ENSG00000077943	-4.02937	-2.19784	-0.366306	-0.366306	-2.24327	-1.05463
ENSG00000163939	-4.02937	-2.19784	-0.366306	-0.366306	-2.24368	-1.05463
ENSG00000237892	-5.12828	-3.37002	-0.293045	-0.293045	-2.24569	-1.05675
ENSG00000137494	-5.20155	-2.93045	-0.439567	-0.439567	-2.24645	-1.05748
ENSG00000134070	-4.46893	-2.56414	-0.366306	-0.366306	-2.24703	-1.05796
ENSG00000108639	-3.73632	-1.90479	-0.293045	-0.293045	-2.24704	-1.05796
ENSG00000155363	-4.54219	-2.56414	-0.439567	-0.439567	-2.2485	-1.05893
ENSG00000110446	-4.9085	-2.85719	-0.439567	-0.439567	-2.24929	-1.05928
ENSG00000066136	-4.24915	-2.49088	-0.439567	-0.439567	-2.25112	-1.06134
ENSG00000197816	-4.10263	-2.2711	-0.293045	-0.293045	-2.25136	-1.06134
ENSG00000188305	-4.24915	-2.34436	-0.366306	-0.366306	-2.25217	-1.06163
ENSG00000160445	-4.68872	-2.6374	-0.439567	-0.439567	-2.25375	-1.06359
ENSG00000166598	-3.73632	-1.90479	-0.293045	-0.293045	-2.25452	-1.06404
ENSG00000254698	-4.76198	-2.93045	-0.293045	-0.293045	-2.2549	-1.06419
ENSG00000148341	-4.39567	-2.41762	-0.366306	-0.366306	-2.25497	-1.06419
ENSG00000260404	-4.76198	-2.78393	-0.366306	-0.366306	-2.25547	-1.06419
ENSG00000188234	-4.68872	-2.78393	-0.439567	-0.439567	-2.25699	-1.06424
ENSG00000164985	-3.80958	-2.05131	-0.293045	-0.293045	-2.25838	-1.06458
ENSG00000183208	-4.9085	-3.00371	-0.366306	-0.366306	-2.2588	-1.06458
ENSG00000204304	-4.76198	-2.71066	-0.366306	-0.366306	-2.25987	-1.06509
ENSG00000028277	-3.51654	-1.83153	-0.293045	-0.293045	-2.26166	-1.06707
ENSG00000188227	-4.83524	-2.78393	-0.439567	-0.439567	-2.26251	-1.06707
ENSG00000129250	-4.54219	-2.71066	-0.439567	-0.439567	-2.26453	-1.06913
ENSG00000180398	-3.66306	-1.90479	-0.293045	-0.293045	-2.26495	-1.06913
ENSG00000108509	-4.68872	-2.71066	-0.439567	-0.439567	-2.265	-1.06913
ENSG00000100299	-4.02937	-2.12457	-0.293045	-0.293045	-2.26536	-1.06913
ENSG00000136026	-3.44328	-1.75827	-0.293045	-0.293045	-2.26765	-1.07007
ENSG00000273311	-5.20155	-3.22349	-0.659351	-0.659351	-2.26822	-1.07007
ENSG00000235437	-4.83524	-2.71066	-0.439567	-0.439567	-2.26857	-1.0701
ENSG00000269501	-4.24915	-2.34436	-0.366306	-0.366306	-2.26895	-1.07023
ENSG00000166979	-5.78763	-3.51654	-0.512828	-0.512828	-2.26902	-1.07023
ENSG00000151575	-4.76198	-2.6374	-0.439567	-0.439567	-2.27007	-1.0706
ENSG00000128438	-5.12828	-3.07697	-0.512828	-0.512828	-2.27186	-1.07178
ENSG00000180628	-3.5898	-1.83153	-0.293045	-0.293045	-2.27631	-1.07842
ENSG00000115677	-3.66306	-1.83153	-0.293045	-0.293045	-2.27749	-1.07887
ENSG00000092929	-5.27481	-3.15023	-0.512828	-0.512828	-2.27916	-1.08063
ENSG00000090339	-3.9561	-2.12457	-0.293045	-0.293045	-2.28087	-1.08197
ENSG00000089876	-5.42133	-3.37002	-0.659351	-0.659351	-2.28167	-1.08277
ENSG00000223697	-5.93416	-4.10263	-0.732612	-0.732612	-2.28192	-1.08277
ENSG00000215030	-3.88284	-2.05131	-0.366306	-0.366306	-2.28207	-1.08277
ENSG00000158352	-4.68872	-2.6374	-0.293045	-0.293045	-2.2824	-1.08277
ENSG00000117228	-4.24915	-2.34436	-0.366306	-0.366306	-2.29052	-1.09185
ENSG00000172602	-4.61546	-2.6374	-0.439567	-0.439567	-2.29094	-1.09204
ENSG00000170381	-5.27481	-3.00371	-0.512828	-0.512828	-2.29116	-1.09204
ENSG00000204388	-5.34807	-3.22349	-0.512828	-0.512828	-2.29139	-1.09204
ENSG00000143951	-3.5898	-1.90479	-0.293045	-0.293045	-2.29333	-1.09347
ENSG00000108518	-3.51654	-1.83153	-0.293045	-0.293045	-2.29357	-1.09347
ENSG00000153179	-3.9561	-2.19784	-0.366306	-0.366306	-2.29433	-1.0941
ENSG00000186283	-3.88284	-2.05131	-0.366306	-0.366306	-2.29473	-1.0941
ENSG00000207650	-4.68872	-2.6374	-0.293045	-0.293045	-2.29678	-1.09611
ENSG00000133872	-3.66306	-1.90479	-0.293045	-0.293045	-2.29743	-1.09634
ENSG00000170160	-4.61546	-2.78393	-0.512828	-0.512828	-2.2977	-1.09634
ENSG00000196998	-3.73632	-1.97805	-0.293045	-0.293045	-2.2987	-1.09686
ENSG00000110324	-4.32241	-2.34436	-0.366306	-0.366306	-2.29918	-1.09691
ENSG00000157353	-4.61546	-2.6374	-0.439567	-0.439567	-2.30058	-1.09805
ENSG00000151789	-5.71437	-3.5898	-0.366306	-0.366306	-2.3008	-1.09805
ENSG00000103064	-4.10263	-2.2711	-0.366306	-0.366306	-2.30324	-1.10067
ENSG00000173020	-4.61546	-2.71066	-0.439567	-0.439567	-2.30361	-1.10076
ENSG00000084207	-3.66306	-1.83153	-0.293045	-0.293045	-2.30525	-1.10296
ENSG00000172667	-4.02937	-2.12457	-0.366306	-0.366306	-2.30718	-1.10512
ENSG00000248445	-4.83524	-2.78393	-0.293045	-0.293045	-2.30799	-1.10593
ENSG00000262999	-4.98176	-3.00371	-0.439567	-0.439567	-2.30845	-1.10612
ENSG00000229119	-3.66306	-1.90479	-0.293045	-0.293045	-2.31013	-1.10792
ENSG00000144674	-3.80958	-1.90479	-0.293045	-0.293045	-2.31053	-1.10807
ENSG00000023902	-4.83524	-2.56414	-0.439567	-0.439567	-2.31394	-1.11162
ENSG00000173442	-5.12828	-3.15023	-0.58609	-0.58609	-2.31483	-1.11207
ENSG00000139112	-4.54219	-2.6374	-0.439567	-0.439567	-2.31581	-1.11317
ENSG00000155158	-4.46893	-2.56414	-0.439567	-0.439567	-2.31699	-1.11459
ENSG00000181704	-3.88284	-1.97805	-0.366306	-0.366306	-2.31907	-1.11697
ENSG00000144824	-5.49459	-3.00371	-0.58609	-0.58609	-2.32159	-1.11963
ENSG00000251339	-4.83524	-2.85719	-0.512828	-0.512828	-2.32403	-1.12204
ENSG00000081800	-4.32241	-2.49088	-0.439567	-0.439567	-2.3242	-1.12204
ENSG00000115267	-4.17589	-2.2711	-0.366306	-0.366306	-2.3294	-1.12734
ENSG00000238103	-3.73632	-1.97805	-0.366306	-0.366306	-2.33005	-1.12778
ENSG00000080845	-4.54219	-2.78393	-0.512828	-0.512828	-2.33077	-1.12794
ENSG00000228589	-3.73632	-1.97805	-0.366306	-0.366306	-2.33185	-1.12874
ENSG00000185339	-4.24915	-2.41762	-0.439567	-0.439567	-2.3328	-1.12919
ENSG00000175115	-4.68872	-2.71066	-0.512828	-0.512828	-2.3357	-1.1327
ENSG00000136003	-3.80958	-1.97805	-0.366306	-0.366306	-2.33725	-1.13441
ENSG00000237249	-4.32241	-2.49088	-0.439567	-0.439567	-2.33731	-1.13441
ENSG00000187667	-4.98176	-3.00371	-0.512828	-0.512828	-2.34087	-1.13825
ENSG00000168003	-3.66306	-1.90479	-0.366306	-0.366306	-2.34102	-1.13825
ENSG00000165633	-4.39567	-2.49088	-0.439567	-0.439567	-2.34145	-1.13825
ENSG00000132849	-5.64111	-3.22349	-0.58609	-0.58609	-2.34152	-1.13825
ENSG00000196187	-4.46893	-2.49088	-0.512828	-0.512828	-2.34208	-1.13825
ENSG00000163960	-4.02937	-2.19784	-0.366306	-0.366306	-2.34327	-1.13906
ENSG00000135637	-4.24915	-2.34436	-0.439567	-0.439567	-2.34415	-1.13999
ENSG00000157514	-4.32241	-2.2711	-0.366306	-0.366306	-2.34437	-1.13999
ENSG00000130707	-4.32241	-2.34436	-0.439567	-0.439567	-2.35063	-1.14588
ENSG00000152104	-5.34807	-3.37002	-0.366306	-0.366306	-2.35071	-1.14588
ENSG00000197081	-3.73632	-1.97805	-0.366306	-0.366306	-2.35123	-1.14588
ENSG00000171456	-3.73632	-2.05131	-0.366306	-0.366306	-2.35177	-1.14588
ENSG00000138600	-4.46893	-2.56414	-0.512828	-0.512828	-2.35181	-1.14588
ENSG00000088808	-4.83524	-2.85719	-0.366306	-0.366306	-2.35525	-1.14975
ENSG00000233559	-3.73632	-2.05131	-0.366306	-0.366306	-2.35776	-1.1528
ENSG00000222872	-4.98176	-3.00371	-0.58609	-0.58609	-2.35782	-1.1528
ENSG00000104067	-3.73632	-1.90479	-0.366306	-0.366306	-2.35818	-1.1528
ENSG00000186409	-4.98176	-3.00371	-0.512828	-0.512828	-2.35832	-1.1528
ENSG00000154803	-4.24915	-2.49088	-0.512828	-0.512828	-2.35859	-1.1528
ENSG00000156860	-4.46893	-2.49088	-0.439567	-0.439567	-2.35885	-1.1528
ENSG00000163659	-4.54219	-2.41762	-0.439567	-0.439567	-2.36005	-1.15333
ENSG00000175602	-4.9085	-2.93045	-0.58609	-0.58609	-2.36293	-1.15649
ENSG00000186231	-5.05502	-3.07697	-0.58609	-0.58609	-2.36396	-1.15714
ENSG00000117616	-4.10263	-2.34436	-0.439567	-0.439567	-2.36405	-1.15714
ENSG00000084070	-3.88284	-1.97805	-0.366306	-0.366306	-2.36446	-1.15714
ENSG00000241839	-4.68872	-2.56414	-0.512828	-0.512828	-2.36546	-1.15743
ENSG00000149972	-4.83524	-2.6374	-0.512828	-0.512828	-2.36592	-1.15743
ENSG00000184515	-4.17589	-2.34436	-0.439567	-0.439567	-2.36695	-1.15773
ENSG00000166289	-5.64111	-3.22349	-0.659351	-0.659351	-2.3717	-1.16335
ENSG00000148200	-4.83524	-2.85719	-0.512828	-0.512828	-2.37511	-1.16731
ENSG00000215014	-5.12828	-3.00371	-0.58609	-0.58609	-2.37747	-1.16945
ENSG00000054967	-4.83524	-2.93045	-0.58609	-0.58609	-2.37985	-1.17128
ENSG00000185122	-4.9085	-2.93045	-0.512828	-0.512828	-2.38003	-1.17128
ENSG00000167996	-3.9561	-2.12457	-0.439567	-0.439567	-2.38339	-1.17361
ENSG00000137642	-5.20155	-3.29675	-0.58609	-0.58609	-2.38359	-1.17361
ENSG00000239388	-5.64111	-3.88284	-0.805873	-0.805873	-2.38367	-1.17361
ENSG00000162734	-3.80958	-2.05131	-0.366306	-0.366306	-2.38664	-1.17533
ENSG00000168772	-4.98176	-3.15023	-0.58609	-0.58609	-2.38694	-1.17533
ENSG00000197182	-4.02937	-2.19784	-0.439567	-0.439567	-2.38812	-1.17667
ENSG00000189339	-3.80958	-2.12457	-0.439567	-0.439567	-2.38848	-1.17671
ENSG00000198618	-3.80958	-2.12457	-0.439567	-0.439567	-2.39023	-1.17902
ENSG00000259175	-5.12828	-3.07697	-0.512828	-0.512828	-2.39302	-1.18155
ENSG00000160219	-4.61546	-2.6374	-0.512828	-0.512828	-2.39385	-1.18165
ENSG00000223525	-4.10263	-2.34436	-0.439567	-0.439567	-2.39389	-1.18165
ENSG00000160271	-4.24915	-2.34436	-0.439567	-0.439567	-2.39475	-1.18203
ENSG00000182670	-3.66306	-1.90479	-0.366306	-0.366306	-2.39592	-1.18338
ENSG00000160888	-3.88284	-2.12457	-0.439567	-0.439567	-2.39621	-1.18338
ENSG00000072274	-4.39567	-2.41762	-0.439567	-0.439567	-2.39648	-1.18338
ENSG00000104689	-4.46893	-2.56414	-0.512828	-0.512828	-2.39652	-1.18338
ENSG00000197943	-4.61546	-2.71066	-0.58609	-0.58609	-2.39766	-1.18349
ENSG00000158109	-4.39567	-2.49088	-0.512828	-0.512828	-2.39984	-1.18593
ENSG00000135905	-5.20155	-3.37002	-0.659351	-0.659351	-2.4003	-1.18614
ENSG00000250574	-6.08068	-4.39567	-0.659351	-0.659351	-2.40264	-1.18884
ENSG00000270367	-4.32241	-2.41762	-0.512828	-0.512828	-2.40647	-1.19343
ENSG00000221947	-4.54219	-2.56414	-0.512828	-0.512828	-2.40702	-1.19378
ENSG00000015133	-3.80958	-2.12457	-0.439567	-0.439567	-2.4093	-1.19527
ENSG00000054690	-5.49459	-3.44328	-0.659351	-0.659351	-2.4108	-1.19717
ENSG00000087074	-3.80958	-2.12457	-0.439567	-0.439567	-2.4145	-1.20263
ENSG00000162496	-5.27481	-3.00371	-0.58609	-0.58609	-2.41526	-1.20276
ENSG00000135926	-3.80958	-2.05131	-0.439567	-0.439567	-2.41735	-1.2056
ENSG00000178971	-4.54219	-2.56414	-0.58609	-0.58609	-2.41748	-1.2056
ENSG00000110492	-5.05502	-3.07697	-0.659351	-0.659351	-2.4223	-1.20919
ENSG00000150593	-3.73632	-2.05131	-0.439567	-0.439567	-2.42323	-1.2096
ENSG00000184897	-4.61546	-2.6374	-0.58609	-0.58609	-2.42455	-1.21072
ENSG00000079482	-3.66306	-1.90479	-0.366306	-0.366306	-2.42465	-1.21072
ENSG00000229344	-4.02937	-2.19784	-0.439567	-0.439567	-2.42487	-1.21072
ENSG00000204256	-3.9561	-2.05131	-0.439567	-0.439567	-2.42687	-1.21271
ENSG00000244479	-3.66306	-1.97805	-0.439567	-0.439567	-2.42872	-1.21517
ENSG00000068001	-4.9085	-2.93045	-0.659351	-0.659351	-2.42972	-1.21622
ENSG00000116017	-3.88284	-2.12457	-0.439567	-0.439567	-2.43156	-1.21697
ENSG00000147573	-5.34807	-3.44328	-0.58609	-0.58609	-2.43283	-1.21846
ENSG00000137970	-3.66306	-1.90479	-0.439567	-0.439567	-2.43299	-1.21846
ENSG00000253626	-5.34807	-3.15023	-0.659351	-0.659351	-2.4387	-1.22517
ENSG00000177731	-4.10263	-2.34436	-0.512828	-0.512828	-2.44008	-1.22686
ENSG00000221953	-4.46893	-2.6374	-0.58609	-0.58609	-2.44057	-1.22686
ENSG00000116514	-5.42133	-3.44328	-0.879134	-0.879134	-2.44059	-1.22686
ENSG00000088367	-4.68872	-2.78393	-0.58609	-0.58609	-2.44187	-1.2275
ENSG00000256904	-5.05502	-3.15023	-0.659351	-0.659351	-2.44226	-1.22756
ENSG00000122497	-3.80958	-2.05131	-0.439567	-0.439567	-2.44319	-1.2285
ENSG00000257950	-4.76198	-2.85719	-0.659351	-0.659351	-2.44329	-1.2285
ENSG00000156976	-3.80958	-1.97805	-0.439567	-0.439567	-2.44413	-1.22889
ENSG00000174353	-4.68872	-2.6374	-0.58609	-0.58609	-2.44626	-1.22934
ENSG00000110046	-4.83524	-2.85719	-0.659351	-0.659351	-2.44639	-1.22934
ENSG00000273356	-5.05502	-3.15023	-0.732612	-0.732612	-2.4466	-1.22934
ENSG00000115694	-5.78763	-3.9561	-0.879134	-0.879134	-2.44765	-1.22934
ENSG00000158286	-4.9085	-2.85719	-0.659351	-0.659351	-2.44774	-1.22934
ENSG00000171843	-4.17589	-2.41762	-0.512828	-0.512828	-2.44873	-1.22934
ENSG00000108256	-3.9561	-2.05131	-0.439567	-0.439567	-2.44957	-1.22934
ENSG00000252361	-4.24915	-2.49088	-0.512828	-0.512828	-2.4544	-1.23528
ENSG00000189229	-5.27481	-3.07697	-0.659351	-0.659351	-2.45515	-1.23592
ENSG00000213240	-4.61546	-2.71066	-0.58609	-0.58609	-2.45719	-1.23789
ENSG00000239024	-5.20155	-3.15023	-0.732612	-0.732612	-2.45773	-1.23789
ENSG00000149809	-4.9085	-3.00371	-0.732612	-0.732612	-2.46073	-1.24156
ENSG00000163681	-4.02937	-2.2711	-0.512828	-0.512828	-2.46087	-1.24156
ENSG00000110880	-4.02937	-2.12457	-0.439567	-0.439567	-2.46229	-1.24171
ENSG00000128383	-4.76198	-2.6374	-0.58609	-0.58609	-2.46578	-1.24447
ENSG00000070882	-4.39567	-2.56414	-0.58609	-0.58609	-2.46738	-1.24564
ENSG00000164220	-4.68872	-2.71066	-0.659351	-0.659351	-2.46934	-1.24637
ENSG00000056558	-5.49459	-3.29675	-0.732612	-0.732612	-2.46961	-1.24637
ENSG00000182149	-4.10263	-2.19784	-0.512828	-0.512828	-2.47125	-1.24751
ENSG00000047849	-4.10263	-2.19784	-0.512828	-0.512828	-2.4733	-1.25024
ENSG00000197747	-3.73632	-1.97805	-0.439567	-0.439567	-2.4746	-1.25175
ENSG00000257221	-4.39567	-2.6374	-0.58609	-0.58609	-2.47568	-1.25175
ENSG00000236008	-3.80958	-2.12457	-0.512828	-0.512828	-2.4769	-1.25254
ENSG00000141736	-5.05502	-2.93045	-0.439567	-0.439567	-2.47908	-1.2543
ENSG00000122484	-3.80958	-2.05131	-0.439567	-0.439567	-2.48043	-1.2559
ENSG00000162434	-4.10263	-2.2711	-0.512828	-0.512828	-2.48085	-1.25598
ENSG00000204130	-4.17589	-2.41762	-0.58609	-0.58609	-2.4818	-1.25693
ENSG00000175287	-5.27481	-3.37002	-0.805873	-0.805873	-2.48627	-1.2618
ENSG00000181458	-3.5898	-1.90479	-0.439567	-0.439567	-2.48947	-1.26579
ENSG00000115310	-3.80958	-2.05131	-0.439567	-0.439567	-2.48977	-1.26579
ENSG00000264352	-4.39567	-2.56414	-0.58609	-0.58609	-2.49182	-1.26759
ENSG00000157881	-4.76198	-2.93045	-0.805873	-0.805873	-2.49191	-1.26759
ENSG00000141027	-3.80958	-2.05131	-0.439567	-0.439567	-2.49344	-1.26759
ENSG00000121895	-4.24915	-2.41762	-0.58609	-0.58609	-2.49436	-1.26774
ENSG00000104824	-3.66306	-1.97805	-0.439567	-0.439567	-2.49459	-1.26774
ENSG00000117289	-4.9085	-2.6374	-0.58609	-0.58609	-2.49543	-1.26774
ENSG00000258123	-4.17589	-2.34436	-0.512828	-0.512828	-2.4971	-1.26917
ENSG00000168421	-3.66306	-1.97805	-0.439567	-0.439567	-2.49776	-1.26917
ENSG00000136770	-3.66306	-1.90479	-0.439567	-0.439567	-2.49872	-1.26999
ENSG00000076604	-5.34807	-3.22349	-0.732612	-0.732612	-2.4988	-1.26999
ENSG00000177738	-4.76198	-2.78393	-0.439567	-0.439567	-2.50401	-1.27603
ENSG00000109381	-3.88284	-2.05131	-0.512828	-0.512828	-2.50707	-1.27986
ENSG00000188130	-4.61546	-2.6374	-0.659351	-0.659351	-2.50794	-1.28065
ENSG00000122085	-4.17589	-2.41762	-0.58609	-0.58609	-2.50801	-1.28065
ENSG00000196205	-3.5898	-1.90479	-0.439567	-0.439567	-2.50929	-1.28162
ENSG00000174125	-4.39567	-2.6374	-0.659351	-0.659351	-2.50971	-1.28162
ENSG00000110944	-5.20155	-3.29675	-0.805873	-0.805873	-2.50994	-1.28162
ENSG00000143093	-5.05502	-3.00371	-0.805873	-0.805873	-2.51115	-1.28162
ENSG00000111405	-7.32612	-5.64111	-1.17218	-1.17218	-2.51202	-1.28202
ENSG00000259692	-5.42133	-3.51654	-0.879134	-0.879134	-2.514	-1.28202
ENSG00000238588	-5.20155	-3.15023	-0.732612	-0.732612	-2.51472	-1.28248
ENSG00000031698	-4.10263	-2.19784	-0.512828	-0.512828	-2.5154	-1.28297
ENSG00000264229	-5.20155	-3.00371	-0.732612	-0.732612	-2.52018	-1.28731
ENSG00000225889	-4.24915	-2.41762	-0.58609	-0.58609	-2.5207	-1.28731
ENSG00000227063	-4.24915	-2.34436	-0.58609	-0.58609	-2.52206	-1.28758
ENSG00000082641	-3.88284	-2.12457	-0.512828	-0.512828	-2.52264	-1.2879
ENSG00000111252	-4.39567	-2.41762	-0.58609	-0.58609	-2.52701	-1.29061
ENSG00000083454	-4.24915	-2.41762	-0.58609	-0.58609	-2.52709	-1.29061
ENSG00000116191	-4.46893	-2.71066	-0.659351	-0.659351	-2.52721	-1.29061
ENSG00000178977	-5.20155	-2.93045	-0.805873	-0.805873	-2.52724	-1.29061
ENSG00000170017	-4.39567	-2.56414	-0.659351	-0.659351	-2.5293	-1.29118
ENSG00000140853	-4.24915	-2.41762	-0.58609	-0.58609	-2.52975	-1.29128
ENSG00000179820	-5.49459	-3.44328	-0.952396	-0.952396	-2.53432	-1.29491
ENSG00000172349	-4.9085	-2.78393	-0.659351	-0.659351	-2.53554	-1.29625
ENSG00000142089	-4.02937	-2.34436	-0.58609	-0.58609	-2.53869	-1.30069
ENSG00000229644	-3.88284	-2.12457	-0.512828	-0.512828	-2.53913	-1.30079
ENSG00000178951	-4.39567	-2.49088	-0.58609	-0.58609	-2.54127	-1.30297
ENSG00000166377	-3.88284	-2.12457	-0.512828	-0.512828	-2.5421	-1.30368
ENSG00000128294	-4.32241	-2.49088	-0.659351	-0.659351	-2.5473	-1.31137
ENSG00000204160	-4.32241	-2.49088	-0.58609	-0.58609	-2.54827	-1.31174
ENSG00000171227	-4.83524	-2.85719	-0.732612	-0.732612	-2.55038	-1.31365
ENSG00000152904	-4.24915	-2.41762	-0.58609	-0.58609	-2.55078	-1.31365
ENSG00000150051	-5.12828	-3.00371	-0.805873	-0.805873	-2.55482	-1.31699
ENSG00000230501	-5.64111	-3.15023	-0.805873	-0.805873	-2.5554	-1.31699
ENSG00000238311	-5.12828	-3.00371	-0.732612	-0.732612	-2.55825	-1.32082
ENSG00000186834	-5.34807	-3.15023	-0.805873	-0.805873	-2.55931	-1.32082
ENSG00000181045	-5.05502	-3.07697	-0.805873	-0.805873	-2.56016	-1.32135
ENSG00000013016	-4.54219	-2.56414	-0.659351	-0.659351	-2.56029	-1.32135
ENSG00000185267	-5.27481	-3.37002	-0.952396	-0.952396	-2.56073	-1.32135
ENSG00000073350	-4.98176	-3.00371	-0.732612	-0.732612	-2.56163	-1.32135
ENSG00000168961	-4.98176	-3.15023	-0.879134	-0.879134	-2.56201	-1.32135
ENSG00000137842	-4.61546	-2.78393	-0.732612	-0.732612	-2.56375	-1.32135
ENSG00000250771	-4.24915	-2.49088	-0.659351	-0.659351	-2.56395	-1.32135
ENSG00000127540	-3.88284	-2.12457	-0.512828	-0.512828	-2.56756	-1.3236
ENSG00000105327	-5.27481	-3.29675	-0.879134	-0.879134	-2.56759	-1.3236
ENSG00000105323	-3.80958	-2.12457	-0.512828	-0.512828	-2.56934	-1.32452
ENSG00000141738	-5.20155	-3.15023	-0.805873	-0.805873	-2.56986	-1.3247
ENSG00000172183	-3.80958	-2.05131	-0.512828	-0.512828	-2.57321	-1.32814
ENSG00000198150	-5.05502	-3.15023	-0.805873	-0.805873	-2.57554	-1.33123
ENSG00000043143	-4.61546	-2.6374	-0.732612	-0.732612	-2.57744	-1.33298
ENSG00000103257	-4.24915	-2.41762	-0.58609	-0.58609	-2.57883	-1.33457
ENSG00000170296	-4.68872	-2.78393	-0.732612	-0.732612	-2.58006	-1.33581
ENSG00000176593	-5.49459	-3.22349	-0.805873	-0.805873	-2.58199	-1.33769
ENSG00000139626	-4.17589	-2.19784	-0.58609	-0.58609	-2.58343	-1.33934
ENSG00000099715	-4.17589	-2.34436	-0.58609	-0.58609	-2.58346	-1.33934
ENSG00000135549	-4.32241	-2.49088	-0.659351	-0.659351	-2.58668	-1.34128
ENSG00000225485	-4.98176	-3.00371	-0.805873	-0.805873	-2.59127	-1.34403
ENSG00000107738	-3.88284	-2.12457	-0.512828	-0.512828	-2.59128	-1.34403
ENSG00000131941	-6.44699	-4.10263	-1.02566	-1.02566	-2.59356	-1.34638
ENSG00000117519	-5.05502	-2.78393	-0.732612	-0.732612	-2.59706	-1.35068
ENSG00000161970	-3.80958	-2.12457	-0.58609	-0.58609	-2.60201	-1.35795
ENSG00000242086	-4.32241	-2.49088	-0.732612	-0.732612	-2.60265	-1.35831
ENSG00000133703	-3.9561	-2.12457	-0.512828	-0.512828	-2.60304	-1.35831
ENSG00000109111	-4.10263	-2.34436	-0.58609	-0.58609	-2.61971	-1.37762
ENSG00000169504	-3.88284	-2.05131	-0.58609	-0.58609	-2.62441	-1.38312
ENSG00000232112	-3.9561	-2.19784	-0.58609	-0.58609	-2.63308	-1.39293
ENSG00000108448	-4.32241	-2.49088	-0.659351	-0.659351	-2.63367	-1.39319
ENSG00000224838	-5.05502	-3.15023	-0.879134	-0.879134	-2.63448	-1.3938
ENSG00000170310	-5.34807	-3.44328	-0.952396	-0.952396	-2.63448	-1.3938
ENSG00000158859	-4.54219	-2.71066	-0.732612	-0.732612	-2.63504	-1.3938
ENSG00000105518	-3.88284	-2.19784	-0.58609	-0.58609	-2.63574	-1.3938
ENSG00000105404	-3.73632	-2.05131	-0.512828	-0.512828	-2.63625	-1.3938
ENSG00000169136	-4.68872	-2.78393	-0.805873	-0.805873	-2.63986	-1.39638
ENSG00000118777	-4.46893	-2.56414	-0.732612	-0.732612	-2.64211	-1.39803
ENSG00000169684	-5.27481	-3.22349	-0.805873	-0.805873	-2.64275	-1.39803
ENSG00000224699	-5.42133	-3.29675	-0.879134	-0.879134	-2.64519	-1.39933
ENSG00000116194	-5.93416	-3.73632	-1.17218	-1.17218	-2.64626	-1.39933
ENSG00000178209	-4.61546	-2.71066	-0.805873	-0.805873	-2.64736	-1.40004
ENSG00000137267	-5.49459	-3.51654	-1.09892	-1.09892	-2.64749	-1.40004
ENSG00000167992	-4.9085	-3.00371	-0.879134	-0.879134	-2.65083	-1.40383
ENSG00000233251	-4.02937	-2.2711	-0.659351	-0.659351	-2.65087	-1.40383
ENSG00000204923	-4.02937	-2.34436	-0.659351	-0.659351	-2.65469	-1.40736
ENSG00000051108	-4.61546	-2.49088	-0.659351	-0.659351	-2.65506	-1.40736
ENSG00000076108	-4.10263	-2.2711	-0.659351	-0.659351	-2.65823	-1.41115
ENSG00000162772	-4.76198	-2.71066	-0.732612	-0.732612	-2.66055	-1.41276
ENSG00000197063	-4.61546	-2.71066	-0.805873	-0.805873	-2.66056	-1.41276
ENSG00000205929	-4.83524	-2.93045	-0.879134	-0.879134	-2.66116	-1.41276
ENSG00000197043	-4.17589	-2.41762	-0.659351	-0.659351	-2.66182	-1.41276
ENSG00000256006	-5.56785	-3.66306	-1.09892	-1.09892	-2.66308	-1.41276
ENSG00000088340	-5.93416	-3.5898	-1.02566	-1.02566	-2.6674	-1.41667
ENSG00000137449	-4.54219	-2.6374	-0.732612	-0.732612	-2.66934	-1.41865
ENSG00000141458	-4.17589	-2.41762	-0.659351	-0.659351	-2.66962	-1.41865
ENSG00000072803	-4.10263	-2.34436	-0.659351	-0.659351	-2.67057	-1.41865
ENSG00000132510	-5.12828	-2.93045	-0.805873	-0.805873	-2.67434	-1.42065
ENSG00000214485	-3.9561	-2.19784	-0.659351	-0.659351	-2.67998	-1.42893
ENSG00000180879	-4.02937	-2.12457	-0.58609	-0.58609	-2.68139	-1.42974
ENSG00000219626	-4.24915	-2.49088	-0.659351	-0.659351	-2.68223	-1.43038
ENSG00000174485	-4.02937	-2.19784	-0.58609	-0.58609	-2.68404	-1.43254
ENSG00000259644	-5.78763	-3.88284	-1.3187	-1.3187	-2.68586	-1.434
ENSG00000259735	-4.83524	-2.85719	-0.805873	-0.805873	-2.68727	-1.43554
ENSG00000197769	-4.76198	-2.78393	-0.805873	-0.805873	-2.68835	-1.43651
ENSG00000125753	-4.54219	-2.6374	-0.805873	-0.805873	-2.68896	-1.43651
ENSG00000132274	-4.32241	-2.56414	-0.732612	-0.732612	-2.69137	-1.43774
ENSG00000259834	-4.17589	-2.41762	-0.732612	-0.732612	-2.69223	-1.4384
ENSG00000091317	-3.88284	-2.12457	-0.58609	-0.58609	-2.6925	-1.4384
ENSG00000163788	-4.76198	-2.85719	-0.805873	-0.805873	-2.69472	-1.44091
ENSG00000178252	-4.98176	-3.15023	-1.02566	-1.02566	-2.69486	-1.44091
ENSG00000205250	-4.76198	-2.85719	-0.879134	-0.879134	-2.6953	-1.44091
ENSG00000026297	-3.80958	-2.05131	-0.58609	-0.58609	-2.6957	-1.44091
ENSG00000235908	-5.27481	-3.44328	-0.952396	-0.952396	-2.6968	-1.44091
ENSG00000156218	-4.39567	-2.49088	-0.732612	-0.732612	-2.6986	-1.44274
ENSG00000161570	-4.54219	-2.71066	-0.805873	-0.805873	-2.70196	-1.44589
ENSG00000259436	-5.71437	-3.73632	-1.09892	-1.09892	-2.70271	-1.44635
ENSG00000241860	-5.49459	-3.44328	-0.952396	-0.952396	-2.70308	-1.44635
ENSG00000087266	-4.32241	-2.41762	-0.732612	-0.732612	-2.70679	-1.45064
ENSG00000242267	-4.83524	-2.93045	-0.879134	-0.879134	-2.70832	-1.45234
ENSG00000042980	-5.05502	-3.15023	-1.02566	-1.02566	-2.70864	-1.45234
ENSG00000108515	-5.93416	-4.02937	-1.3187	-1.3187	-2.71272	-1.45588
ENSG00000185885	-3.73632	-2.05131	-0.58609	-0.58609	-2.71734	-1.46151
ENSG00000178719	-4.9085	-2.93045	-0.879134	-0.879134	-2.722	-1.46382
ENSG00000061938	-4.9085	-2.93045	-0.879134	-0.879134	-2.72483	-1.4645
ENSG00000100906	-4.24915	-2.34436	-0.659351	-0.659351	-2.72525	-1.4645
ENSG00000134324	-4.10263	-2.2711	-0.659351	-0.659351	-2.72713	-1.46665
ENSG00000101439	-5.34807	-3.44328	-1.02566	-1.02566	-2.73095	-1.46894
ENSG00000165186	-5.71437	-3.80958	-1.24544	-1.24544	-2.73182	-1.46894
ENSG00000143153	-4.68872	-2.85719	-0.879134	-0.879134	-2.73232	-1.46894
ENSG00000175414	-4.98176	-2.85719	-0.879134	-0.879134	-2.73445	-1.47148
ENSG00000039523	-5.34807	-2.85719	-0.879134	-0.879134	-2.74041	-1.47744
ENSG00000198794	-5.34807	-3.29675	-1.02566	-1.02566	-2.74256	-1.47979
ENSG00000095951	-4.32241	-2.49088	-0.732612	-0.732612	-2.74338	-1.47979
ENSG00000185507	-4.61546	-2.78393	-0.879134	-0.879134	-2.75398	-1.49099
ENSG00000170525	-4.76198	-2.93045	-0.952396	-0.952396	-2.75398	-1.49099
ENSG00000114251	-4.98176	-3.00371	-1.02566	-1.02566	-2.75576	-1.49151
ENSG00000254337	-5.34807	-3.29675	-1.02566	-1.02566	-2.75797	-1.49423
ENSG00000114353	-4.32241	-2.49088	-0.805873	-0.805873	-2.75865	-1.49423
ENSG00000132507	-3.73632	-2.05131	-0.659351	-0.659351	-2.76028	-1.4948
ENSG00000116871	-4.9085	-3.00371	-0.952396	-0.952396	-2.76169	-1.49625
ENSG00000035720	-5.34807	-3.29675	-1.17218	-1.17218	-2.76251	-1.49652
ENSG00000123636	-3.88284	-2.19784	-0.659351	-0.659351	-2.76336	-1.49656
ENSG00000237973	-4.24915	-2.49088	-0.732612	-0.732612	-2.76564	-1.49938
ENSG00000146232	-4.9085	-3.07697	-1.02566	-1.02566	-2.76665	-1.49993
ENSG00000259758	-4.10263	-2.2711	-0.659351	-0.659351	-2.76776	-1.49993
ENSG00000072778	-4.17589	-2.41762	-0.732612	-0.732612	-2.76953	-1.50163
ENSG00000095015	-4.24915	-2.41762	-0.732612	-0.732612	-2.77192	-1.50306
ENSG00000185338	-5.34807	-3.37002	-1.02566	-1.02566	-2.77254	-1.50324
ENSG00000141002	-4.24915	-2.41762	-0.732612	-0.732612	-2.77363	-1.50419
ENSG00000244313	-4.17589	-2.41762	-0.732612	-0.732612	-2.77546	-1.50629
ENSG00000178764	-4.83524	-2.78393	-0.879134	-0.879134	-2.78514	-1.51604
ENSG00000078124	-4.39567	-2.56414	-0.805873	-0.805873	-2.78585	-1.51637
ENSG00000187479	-5.42133	-3.29675	-0.952396	-0.952396	-2.7876	-1.51755
ENSG00000249961	-5.12828	-3.22349	-0.805873	-0.805873	-2.78784	-1.51755
ENSG00000171132	-6.30046	-4.39567	-1.53849	-1.53849	-2.79191	-1.52194
ENSG00000243716	-4.61546	-2.78393	-0.879134	-0.879134	-2.79303	-1.52291
ENSG00000185088	-3.80958	-2.12457	-0.659351	-0.659351	-2.7943	-1.52412
ENSG00000214595	-5.12828	-3.07697	-0.952396	-0.952396	-2.79747	-1.52537
ENSG00000164691	-4.61546	-2.78393	-0.879134	-0.879134	-2.7977	-1.52537
ENSG00000144366	-5.56785	-3.80958	-1.3187	-1.3187	-2.80108	-1.52673
ENSG00000212802	-4.02937	-2.2711	-0.732612	-0.732612	-2.80254	-1.52741
ENSG00000234290	-4.68872	-2.93045	-0.952396	-0.952396	-2.80659	-1.53218
ENSG00000129757	-4.68872	-2.85719	-0.952396	-0.952396	-2.80706	-1.53218
ENSG00000197937	-5.34807	-3.29675	-1.09892	-1.09892	-2.8087	-1.53387
ENSG00000204219	-5.56785	-3.73632	-1.3187	-1.3187	-2.81036	-1.53567
ENSG00000130779	-4.10263	-2.2711	-0.732612	-0.732612	-2.81095	-1.53579
ENSG00000183049	-4.98176	-3.07697	-0.952396	-0.952396	-2.8116	-1.53579
ENSG00000031081	-5.64111	-3.80958	-1.3187	-1.3187	-2.81904	-1.5434
ENSG00000181090	-4.32241	-2.56414	-0.805873	-0.805873	-2.82127	-1.5434
ENSG00000155465	-4.68872	-2.85719	-1.02566	-1.02566	-2.82263	-1.54428
ENSG00000153721	-5.34807	-3.37002	-1.02566	-1.02566	-2.83317	-1.55839
ENSG00000185905	-4.24915	-2.41762	-0.732612	-0.732612	-2.83404	-1.55891
ENSG00000133874	-4.9085	-2.93045	-0.952396	-0.952396	-2.83663	-1.56131
ENSG00000182179	-6.2272	-3.80958	-1.46522	-1.46522	-2.83676	-1.56131
ENSG00000104450	-4.39567	-2.6374	-0.879134	-0.879134	-2.84044	-1.5648
ENSG00000133138	-4.02937	-2.34436	-0.732612	-0.732612	-2.84249	-1.56589
ENSG00000180822	-4.24915	-2.41762	-0.805873	-0.805873	-2.84303	-1.56589
ENSG00000179950	-4.24915	-2.41762	-0.805873	-0.805873	-2.84647	-1.57005
ENSG00000116473	-4.32241	-2.56414	-0.805873	-0.805873	-2.85203	-1.5737
ENSG00000189091	-4.39567	-2.49088	-0.805873	-0.805873	-2.85236	-1.5737
ENSG00000198355	-4.39567	-2.6374	-0.879134	-0.879134	-2.85418	-1.57537
ENSG00000144524	-4.17589	-2.41762	-0.805873	-0.805873	-2.86045	-1.58266
ENSG00000162654	-4.46893	-2.71066	-0.879134	-0.879134	-2.86129	-1.58266
ENSG00000147382	-5.20155	-3.15023	-1.02566	-1.02566	-2.86634	-1.58587
ENSG00000076513	-4.83524	-2.93045	-1.09892	-1.09892	-2.86856	-1.58763
ENSG00000070182	-5.12828	-3.15023	-1.17218	-1.17218	-2.8712	-1.59003
ENSG00000184060	-4.68872	-2.85719	-0.952396	-0.952396	-2.87517	-1.59452
ENSG00000118058	-4.32241	-2.41762	-0.805873	-0.805873	-2.87583	-1.59468
ENSG00000112096	-4.24915	-2.41762	-0.805873	-0.805873	-2.88253	-1.60343
ENSG00000101265	-4.76198	-2.71066	-0.879134	-0.879134	-2.88477	-1.60606
ENSG00000173597	-4.17589	-2.49088	-0.879134	-0.879134	-2.89097	-1.61274
ENSG00000266340	-4.54219	-2.6374	-0.879134	-0.879134	-2.89185	-1.61276
ENSG00000253103	-4.02937	-2.34436	-0.805873	-0.805873	-2.89948	-1.62029
ENSG00000128016	-4.17589	-2.34436	-0.805873	-0.805873	-2.90682	-1.62731
ENSG00000108679	-5.93416	-3.9561	-1.53849	-1.53849	-2.90725	-1.62731
ENSG00000196843	-4.24915	-2.41762	-0.805873	-0.805873	-2.91089	-1.6292
ENSG00000244398	-4.02937	-2.34436	-0.805873	-0.805873	-2.91195	-1.62996
ENSG00000090061	-5.20155	-3.07697	-1.09892	-1.09892	-2.91394	-1.63126
ENSG00000205189	-6.44699	-4.10263	-1.46522	-1.46522	-2.91569	-1.63128
ENSG00000198053	-5.20155	-3.22349	-1.17218	-1.17218	-2.92066	-1.63541
ENSG00000240505	-4.32241	-2.56414	-0.879134	-0.879134	-2.92385	-1.63857
ENSG00000119801	-4.61546	-2.6374	-0.879134	-0.879134	-2.92553	-1.63937
ENSG00000120875	-6.00742	-4.10263	-1.53849	-1.53849	-2.92794	-1.64079
ENSG00000144655	-4.39567	-2.6374	-0.879134	-0.879134	-2.92867	-1.64079
ENSG00000134294	-4.46893	-2.49088	-0.805873	-0.805873	-2.92963	-1.64117
ENSG00000124201	-4.76198	-2.85719	-0.952396	-0.952396	-2.93155	-1.64324
ENSG00000069869	-4.10263	-2.41762	-0.805873	-0.805873	-2.93279	-1.64426
ENSG00000227081	-4.32241	-2.56414	-0.879134	-0.879134	-2.93633	-1.64885
ENSG00000104870	-4.46893	-2.6374	-0.879134	-0.879134	-2.9365	-1.64885
ENSG00000258111	-6.08068	-4.17589	-1.61175	-1.61175	-2.93838	-1.6502
ENSG00000249614	-3.9561	-2.2711	-0.805873	-0.805873	-2.93994	-1.6517
ENSG00000128512	-4.76198	-2.78393	-0.952396	-0.952396	-2.94028	-1.6517
ENSG00000138670	-5.05502	-2.93045	-0.952396	-0.952396	-2.94304	-1.65467
ENSG00000168994	-5.56785	-3.73632	-1.46522	-1.46522	-2.94981	-1.66241
ENSG00000136068	-5.12828	-3.07697	-1.09892	-1.09892	-2.95013	-1.66241
ENSG00000104529	-3.9561	-2.2711	-0.805873	-0.805873	-2.95059	-1.66241
ENSG00000213442	-4.02937	-2.34436	-0.805873	-0.805873	-2.9522	-1.66241
ENSG00000127124	-5.27481	-3.15023	-1.09892	-1.09892	-2.95397	-1.66241
ENSG00000155090	-4.68872	-2.71066	-1.02566	-1.02566	-2.95784	-1.66643
ENSG00000130254	-4.32241	-2.49088	-0.879134	-0.879134	-2.95868	-1.66678
ENSG00000252391	-4.83524	-3.00371	-1.09892	-1.09892	-2.9614	-1.67007
ENSG00000161011	-4.17589	-2.41762	-0.805873	-0.805873	-2.96194	-1.67007
ENSG00000220842	-4.10263	-2.34436	-0.805873	-0.805873	-2.96463	-1.67126
ENSG00000165168	-4.61546	-2.6374	-0.879134	-0.879134	-2.96512	-1.67126
ENSG00000269821	-4.17589	-2.34436	-0.805873	-0.805873	-2.96535	-1.67126
ENSG00000204991	-5.34807	-3.44328	-1.3187	-1.3187	-2.96594	-1.67126
ENSG00000165140	-6.2272	-4.32241	-1.68501	-1.68501	-2.96618	-1.67126
ENSG00000102908	-5.12828	-3.15023	-1.24544	-1.24544	-2.97081	-1.67494
ENSG00000255537	-5.49459	-3.44328	-1.17218	-1.17218	-2.98248	-1.69036
ENSG00000034152	-4.54219	-2.78393	-1.02566	-1.02566	-2.98387	-1.69156
ENSG00000157601	-4.76198	-2.85719	-1.02566	-1.02566	-2.99213	-1.70243
ENSG00000154359	-5.49459	-3.51654	-1.3187	-1.3187	-2.99433	-1.70487
ENSG00000198624	-4.54219	-2.71066	-0.952396	-0.952396	-2.99842	-1.71022
ENSG00000122012	-5.20155	-3.07697	-1.17218	-1.17218	-3.00367	-1.7164
ENSG00000004534	-4.17589	-2.41762	-0.879134	-0.879134	-3.00507	-1.7176
ENSG00000093072	-4.68872	-2.85719	-1.02566	-1.02566	-3.00637	-1.71864
ENSG00000151773	-4.98176	-3.00371	-1.09892	-1.09892	-3.00731	-1.7191
ENSG00000229807	-4.24915	-2.41762	-0.879134	-0.879134	-3.00881	-1.72046
ENSG00000133805	-6.08068	-4.10263	-1.3187	-1.3187	-3.00986	-1.72109
ENSG00000259380	-3.9561	-2.2711	-0.805873	-0.805873	-3.01152	-1.72132
ENSG00000266538	-5.93416	-4.02937	-1.68501	-1.68501	-3.02297	-1.73542
ENSG00000165895	-5.12828	-3.22349	-1.17218	-1.17218	-3.02342	-1.73542
ENSG00000203620	-4.39567	-2.6374	-0.952396	-0.952396	-3.02871	-1.74131
ENSG00000234428	-5.8609	-3.80958	-1.3187	-1.3187	-3.03561	-1.74892
ENSG00000108669	-4.46893	-2.6374	-0.952396	-0.952396	-3.04002	-1.75275
ENSG00000177606	-4.46893	-2.71066	-0.952396	-0.952396	-3.04384	-1.75762
ENSG00000213928	-5.42133	-3.51654	-1.3187	-1.3187	-3.04626	-1.76035
ENSG00000105699	-5.34807	-3.51654	-1.39196	-1.39196	-3.05	-1.7641
ENSG00000131437	-4.68872	-2.93045	-1.09892	-1.09892	-3.05483	-1.76749
ENSG00000172575	-4.76198	-3.00371	-1.09892	-1.09892	-3.05682	-1.7685
ENSG00000164463	-4.54219	-2.6374	-0.952396	-0.952396	-3.05711	-1.7685
ENSG00000092820	-4.32241	-2.41762	-0.879134	-0.879134	-3.06207	-1.77163
ENSG00000214182	-4.32241	-2.56414	-0.952396	-0.952396	-3.06324	-1.77225
ENSG00000168447	-5.34807	-3.44328	-1.3187	-1.3187	-3.07391	-1.78759
ENSG00000232774	-4.24915	-2.6374	-0.952396	-0.952396	-3.07893	-1.79117
ENSG00000103642	-5.05502	-3.15023	-1.17218	-1.17218	-3.08767	-1.79834
ENSG00000166016	-5.78763	-3.88284	-1.46522	-1.46522	-3.09081	-1.8021
ENSG00000153064	-6.52025	-4.24915	-1.75827	-1.75827	-3.09159	-1.80224
ENSG00000026025	-4.39567	-2.56414	-0.952396	-0.952396	-3.09207	-1.80224
ENSG00000124151	-4.54219	-2.6374	-0.952396	-0.952396	-3.09518	-1.80564
ENSG00000186960	-5.12828	-3.22349	-1.24544	-1.24544	-3.1081	-1.82433
ENSG00000137193	-4.24915	-2.49088	-0.952396	-0.952396	-3.10975	-1.82581
ENSG00000225914	-4.32241	-2.56414	-0.952396	-0.952396	-3.11174	-1.82779
ENSG00000051523	-4.17589	-2.49088	-0.952396	-0.952396	-3.11723	-1.8309
ENSG00000237515	-4.24915	-2.49088	-0.952396	-0.952396	-3.12564	-1.84159
ENSG00000165805	-4.24915	-2.49088	-0.952396	-0.952396	-3.12683	-1.84234
ENSG00000112576	-5.42133	-3.37002	-1.39196	-1.39196	-3.13419	-1.84712
ENSG00000083799	-4.54219	-2.71066	-1.02566	-1.02566	-3.13544	-1.84794
ENSG00000092421	-5.78763	-4.10263	-1.53849	-1.53849	-3.13702	-1.84927
ENSG00000122515	-4.98176	-3.22349	-1.24544	-1.24544	-3.13806	-1.84977
ENSG00000124831	-4.54219	-2.56414	-0.952396	-0.952396	-3.13966	-1.85004
ENSG00000099194	-4.54219	-2.71066	-1.02566	-1.02566	-3.14179	-1.8522
ENSG00000125148	-5.34807	-3.44328	-1.39196	-1.39196	-3.1431	-1.8531
ENSG00000249348	-4.17589	-2.49088	-0.952396	-0.952396	-3.15268	-1.86439
ENSG00000138756	-5.05502	-3.07697	-1.17218	-1.17218	-3.15867	-1.86909
ENSG00000112378	-4.68872	-2.85719	-1.09892	-1.09892	-3.1819	-1.89544
ENSG00000100342	-4.32241	-2.56414	-1.02566	-1.02566	-3.18435	-1.8964
ENSG00000162511	-4.46893	-2.49088	-0.952396	-0.952396	-3.1916	-1.90227
ENSG00000165507	-5.12828	-3.22349	-1.3187	-1.3187	-3.19468	-1.90579
ENSG00000118971	-4.68872	-2.78393	-1.09892	-1.09892	-3.19827	-1.91008
ENSG00000150477	-4.24915	-2.56414	-1.02566	-1.02566	-3.20098	-1.91304
ENSG00000266658	-4.24915	-2.49088	-0.952396	-0.952396	-3.20756	-1.91956
ENSG00000117643	-5.8609	-4.02937	-1.83153	-1.83153	-3.21608	-1.92865
ENSG00000248360	-4.10263	-2.41762	-0.952396	-0.952396	-3.21891	-1.93074
ENSG00000185650	-4.9085	-3.00371	-1.17218	-1.17218	-3.21934	-1.93074
ENSG00000188786	-4.83524	-3.00371	-1.24544	-1.24544	-3.22517	-1.93459
ENSG00000180773	-5.71437	-3.80958	-1.53849	-1.53849	-3.22526	-1.93459
ENSG00000188906	-5.56785	-3.80958	-1.53849	-1.53849	-3.2262	-1.93459
ENSG00000139239	-4.98176	-3.15023	-1.24544	-1.24544	-3.22814	-1.93505
ENSG00000155307	-4.39567	-2.56414	-1.02566	-1.02566	-3.22825	-1.93505
ENSG00000251562	-4.83524	-2.93045	-1.17218	-1.17218	-3.22853	-1.93505
ENSG00000099875	-4.61546	-2.78393	-1.17218	-1.17218	-3.23152	-1.93505
ENSG00000157500	-4.61546	-2.71066	-1.09892	-1.09892	-3.23396	-1.93505
ENSG00000213121	-4.54219	-2.85719	-1.17218	-1.17218	-3.23657	-1.9374
ENSG00000173334	-4.68872	-2.78393	-1.09892	-1.09892	-3.24537	-1.94603
ENSG00000196220	-6.2272	-4.39567	-1.97805	-1.97805	-3.2479	-1.94864
ENSG00000174749	-4.24915	-2.49088	-1.02566	-1.02566	-3.2618	-1.96472
ENSG00000157551	-5.34807	-3.44328	-1.46522	-1.46522	-3.268	-1.97018
ENSG00000196498	-4.98176	-3.22349	-1.3187	-1.3187	-3.26965	-1.97038
ENSG00000079819	-4.98176	-3.15023	-1.24544	-1.24544	-3.2753	-1.9764
ENSG00000162825	-4.46893	-2.71066	-1.09892	-1.09892	-3.27552	-1.9764
ENSG00000015568	-4.61546	-2.85719	-1.17218	-1.17218	-3.29573	-1.99456
ENSG00000197879	-5.12828	-3.37002	-1.53849	-1.53849	-3.30138	-2.0005
ENSG00000124942	-5.05502	-3.07697	-1.24544	-1.24544	-3.30163	-2.0005
ENSG00000141682	-5.27481	-3.22349	-1.39196	-1.39196	-3.30532	-2.00257
ENSG00000109436	-4.54219	-2.85719	-1.17218	-1.17218	-3.31356	-2.01236
ENSG00000111678	-4.39567	-2.71066	-1.17218	-1.17218	-3.31399	-2.01236
ENSG00000120889	-6.30046	-4.17589	-1.83153	-1.83153	-3.31525	-2.01236
ENSG00000230006	-4.61546	-2.78393	-1.09892	-1.09892	-3.3244	-2.02212
ENSG00000188229	-4.54219	-2.71066	-1.17218	-1.17218	-3.33357	-2.03193
ENSG00000161010	-4.68872	-2.93045	-1.24544	-1.24544	-3.33442	-2.03193
ENSG00000196182	-5.12828	-3.37002	-1.39196	-1.39196	-3.33799	-2.03591
ENSG00000143878	-4.54219	-2.71066	-1.17218	-1.17218	-3.3447	-2.0433
ENSG00000163235	-5.8609	-4.10263	-1.83153	-1.83153	-3.34529	-2.0433
ENSG00000115738	-6.15394	-3.73632	-1.61175	-1.61175	-3.34805	-2.04566
ENSG00000169413	-5.34807	-3.37002	-1.39196	-1.39196	-3.35914	-2.06087
ENSG00000074755	-4.83524	-3.00371	-1.24544	-1.24544	-3.36819	-2.0717
ENSG00000062716	-5.34807	-3.22349	-1.3187	-1.3187	-3.37219	-2.07632
ENSG00000173193	-5.56785	-3.44328	-1.46522	-1.46522	-3.37316	-2.07642
ENSG00000145050	-4.46893	-2.71066	-1.17218	-1.17218	-3.37423	-2.07667
ENSG00000143772	-5.27481	-3.37002	-1.46522	-1.46522	-3.38162	-2.08632
ENSG00000169246	-4.98176	-3.22349	-1.46522	-1.46522	-3.39204	-2.0964
ENSG00000099958	-4.39567	-2.71066	-1.17218	-1.17218	-3.3927	-2.0964
ENSG00000232573	-4.46893	-2.71066	-1.17218	-1.17218	-3.39397	-2.09654
ENSG00000104081	-5.64111	-3.73632	-1.75827	-1.75827	-3.40299	-2.10582
ENSG00000074370	-4.98176	-3.22349	-1.39196	-1.39196	-3.40774	-2.10872
ENSG00000260655	-6.00742	-4.10263	-1.83153	-1.83153	-3.41932	-2.11892
ENSG00000236552	-4.54219	-2.78393	-1.24544	-1.24544	-3.43285	-2.13755
ENSG00000116954	-4.9085	-3.07697	-1.39196	-1.39196	-3.43417	-2.1381
ENSG00000167625	-4.83524	-2.93045	-1.3187	-1.3187	-3.44202	-2.14687
ENSG00000173212	-4.46893	-2.78393	-1.24544	-1.24544	-3.44932	-2.15481
ENSG00000007237	-5.93416	-4.10263	-1.90479	-1.90479	-3.45025	-2.15481
ENSG00000174282	-5.34807	-3.37002	-1.46522	-1.46522	-3.4718	-2.18079
ENSG00000197329	-4.9085	-3.00371	-1.24544	-1.24544	-3.47355	-2.18194
ENSG00000151651	-5.56785	-3.5898	-1.61175	-1.61175	-3.47792	-2.18605
ENSG00000171223	-4.83524	-3.00371	-1.3187	-1.3187	-3.47927	-2.18605
ENSG00000101665	-5.05502	-3.22349	-1.46522	-1.46522	-3.47929	-2.18605
ENSG00000107968	-5.05502	-3.22349	-1.46522	-1.46522	-3.47963	-2.18605
ENSG00000166710	-4.83524	-3.00371	-1.3187	-1.3187	-3.48142	-2.18605
ENSG00000046653	-5.20155	-3.29675	-1.46522	-1.46522	-3.4929	-2.19134
ENSG00000166405	-5.05502	-3.22349	-1.46522	-1.46522	-3.50026	-2.20066
ENSG00000164916	-4.46893	-2.71066	-1.17218	-1.17218	-3.50057	-2.20066
ENSG00000125844	-4.54219	-2.85719	-1.3187	-1.3187	-3.52992	-2.23374
ENSG00000185864	-4.68872	-3.00371	-1.39196	-1.39196	-3.53077	-2.23374
ENSG00000232855	-6.66677	-4.54219	-2.12457	-2.12457	-3.53256	-2.23439
ENSG00000167261	-6.30046	-4.10263	-1.97805	-1.97805	-3.55417	-2.2567
ENSG00000119508	-6.44699	-4.24915	-1.97805	-1.97805	-3.55469	-2.2567
ENSG00000151338	-4.46893	-2.78393	-1.24544	-1.24544	-3.55591	-2.2567
ENSG00000161835	-6.66677	-4.68872	-2.56414	-2.56414	-3.55959	-2.25923
ENSG00000169442	-4.9085	-3.15023	-1.46522	-1.46522	-3.56817	-2.26768
ENSG00000234883	-4.98176	-3.07697	-1.46522	-1.46522	-3.57814	-2.28063
ENSG00000135723	-5.64111	-3.73632	-1.83153	-1.83153	-3.57848	-2.28063
ENSG00000123095	-6.08068	-4.17589	-2.05131	-2.05131	-3.58133	-2.28209
ENSG00000114541	-5.8609	-3.73632	-1.68501	-1.68501	-3.59338	-2.29376
ENSG00000123358	-5.56785	-3.73632	-1.75827	-1.75827	-3.59405	-2.29376
ENSG00000121966	-6.00742	-3.73632	-1.53849	-1.53849	-3.59729	-2.2956
ENSG00000072364	-5.05502	-3.15023	-1.46522	-1.46522	-3.60047	-2.29694
ENSG00000233476	-4.54219	-2.85719	-1.3187	-1.3187	-3.60268	-2.29851
ENSG00000171552	-4.9085	-3.15023	-1.46522	-1.46522	-3.60994	-2.30087
ENSG00000147408	-5.8609	-3.9561	-1.83153	-1.83153	-3.66632	-2.36892
ENSG00000196208	-4.98176	-3.07697	-1.46522	-1.46522	-3.67553	-2.3753
ENSG00000158125	-6.2272	-4.24915	-2.12457	-2.12457	-3.6805	-2.37719
ENSG00000154874	-6.59351	-4.68872	-2.56414	-2.56414	-3.68061	-2.37719
ENSG00000082438	-5.05502	-3.15023	-1.46522	-1.46522	-3.68203	-2.37719
ENSG00000182162	-4.98176	-3.15023	-1.46522	-1.46522	-3.71686	-2.41712
ENSG00000186594	-5.34807	-3.51654	-1.68501	-1.68501	-3.72091	-2.41932
ENSG00000145819	-5.49459	-3.5898	-1.75827	-1.75827	-3.72565	-2.42248
ENSG00000154265	-5.64111	-3.66306	-1.75827	-1.75827	-3.73341	-2.4318
ENSG00000130164	-4.83524	-2.93045	-1.39196	-1.39196	-3.73921	-2.4383
ENSG00000148841	-5.78763	-3.80958	-1.83153	-1.83153	-3.74165	-2.43994
ENSG00000152818	-5.12828	-3.29675	-1.53849	-1.53849	-3.74487	-2.44271
ENSG00000113580	-4.98176	-3.15023	-1.53849	-1.53849	-3.75143	-2.45026
ENSG00000172318	-4.9085	-3.22349	-1.53849	-1.53849	-3.75392	-2.45196
ENSG00000143333	-5.93416	-3.88284	-1.90479	-1.90479	-3.75923	-2.45771
ENSG00000169894	-6.52025	-4.61546	-2.2711	-2.2711	-3.76924	-2.46636
ENSG00000142178	-4.76198	-2.93045	-1.39196	-1.39196	-3.77066	-2.46648
ENSG00000130522	-4.61546	-2.85719	-1.39196	-1.39196	-3.77386	-2.46914
ENSG00000272060	-6.2272	-4.02937	-1.90479	-1.90479	-3.78138	-2.47593
ENSG00000160789	-5.27481	-3.37002	-1.61175	-1.61175	-3.80532	-2.49992
ENSG00000197872	-6.37372	-4.39567	-2.34436	-2.34436	-3.82568	-2.51955
ENSG00000137936	-5.56785	-3.5898	-1.68501	-1.68501	-3.83183	-2.5263
ENSG00000185022	-5.12828	-3.37002	-1.68501	-1.68501	-3.85368	-2.5513
ENSG00000185442	-5.12828	-3.37002	-1.68501	-1.68501	-3.86638	-2.56104
ENSG00000254206	-5.93416	-4.02937	-2.05131	-2.05131	-3.87423	-2.56799
ENSG00000256948	-4.83524	-3.22349	-1.61175	-1.61175	-3.89231	-2.58512
ENSG00000038382	-6.30046	-4.46893	-2.34436	-2.34436	-3.89532	-2.58722
ENSG00000073849	-5.56785	-3.5898	-1.75827	-1.75827	-3.89664	-2.58722
ENSG00000249736	-4.9085	-3.15023	-1.61175	-1.61175	-3.90339	-2.5943
ENSG00000173200	-5.64111	-3.88284	-2.05131	-2.05131	-3.90689	-2.59707
ENSG00000160223	-5.05502	-3.37002	-1.68501	-1.68501	-3.94104	-2.63458
ENSG00000198832	-4.76198	-3.07697	-1.61175	-1.61175	-3.94482	-2.63568
ENSG00000206341	-5.05502	-3.29675	-1.68501	-1.68501	-3.94979	-2.63984
ENSG00000114315	-5.56785	-3.80958	-1.97805	-1.97805	-3.95257	-2.63984
ENSG00000123146	-4.83524	-3.07697	-1.53849	-1.53849	-3.95698	-2.64304
ENSG00000241106	-5.8609	-3.9561	-2.12457	-2.12457	-4.01192	-2.71347
ENSG00000115956	-5.78763	-3.73632	-1.83153	-1.83153	-4.01843	-2.71886
ENSG00000123091	-5.34807	-3.51654	-1.83153	-1.83153	-4.03619	-2.738
ENSG00000156675	-5.34807	-3.44328	-1.83153	-1.83153	-4.05005	-2.755
ENSG00000165591	-6.66677	-4.61546	-2.56414	-2.56414	-4.05022	-2.755
ENSG00000204642	-5.56785	-3.66306	-1.90479	-1.90479	-4.05876	-2.76234
ENSG00000003402	-5.20155	-3.29675	-1.68501	-1.68501	-4.06143	-2.76362
ENSG00000115828	-6.00742	-4.02937	-2.12457	-2.12457	-4.07035	-2.77116
ENSG00000171604	-6.00742	-4.02937	-2.19784	-2.19784	-4.1402	-2.84813
ENSG00000133321	-5.05502	-3.22349	-1.68501	-1.68501	-4.20358	-2.91463
ENSG00000184602	-5.8609	-3.9561	-2.12457	-2.12457	-4.21663	-2.92989
ENSG00000244405	-5.27481	-3.51654	-1.90479	-1.90479	-4.24822	-2.95665
ENSG00000206503	-5.49459	-3.5898	-1.90479	-1.90479	-4.27788	-2.99166
ENSG00000126709	-5.56785	-3.73632	-2.05131	-2.05131	-4.33599	-3.05943
ENSG00000170542	-8.42504	-6.08068	-3.29675	-3.29675	-4.3456	-3.06957
ENSG00000145901	-5.71437	-3.88284	-2.12457	-2.12457	-4.39661	-3.12684
ENSG00000152409	-5.8609	-4.02937	-2.12457	-2.12457	-4.41347	-3.14354
ENSG00000118503	-5.8609	-3.88284	-2.12457	-2.12457	-4.45841	-3.19797
ENSG00000065809	-5.8609	-3.80958	-2.19784	-2.19784	-4.48258	-3.22733
ENSG00000114737	-6.15394	-4.24915	-2.41762	-2.41762	-4.48959	-3.23361
ENSG00000267519	-6.44699	-4.32241	-2.34436	-2.34436	-4.49664	-3.23361
ENSG00000169213	-5.8609	-3.9561	-2.19784	-2.19784	-4.51225	-3.24789
ENSG00000167723	-6.74003	-4.61546	-2.71066	-2.71066	-4.52305	-3.25569
ENSG00000103187	-6.2272	-4.24915	-2.41762	-2.41762	-4.54143	-3.27352
ENSG00000162783	-5.93416	-4.10263	-2.41762	-2.41762	-4.54717	-3.27398
ENSG00000159388	-5.78763	-3.80958	-2.12457	-2.12457	-4.55209	-3.27398
ENSG00000085117	-5.78763	-3.9561	-2.2711	-2.2711	-4.56935	-3.2838
ENSG00000197989	-5.49459	-3.73632	-2.05131	-2.05131	-4.57467	-3.2838
ENSG00000124762	-5.64111	-3.73632	-2.05131	-2.05131	-4.62025	-3.33083
ENSG00000184588	-5.93416	-3.9561	-2.19784	-2.19784	-4.63315	-3.33925
ENSG00000204525	-5.64111	-3.80958	-2.19784	-2.19784	-4.6394	-3.33993
ENSG00000100290	-6.37372	-4.54219	-2.71066	-2.71066	-4.65698	-3.35925
ENSG00000154898	-6.30046	-4.39567	-2.56414	-2.56414	-4.66464	-3.36517
ENSG00000107263	-6.08068	-4.32241	-2.56414	-2.56414	-4.73399	-3.43745
ENSG00000125347	-5.8609	-4.02937	-2.34436	-2.34436	-4.77689	-3.48788
ENSG00000196684	-5.71437	-3.88284	-2.2711	-2.2711	-4.78288	-3.49112
ENSG00000124225	-6.15394	-4.24915	-2.49088	-2.49088	-4.81685	-3.53141
ENSG00000173846	-5.8609	-4.02937	-2.41762	-2.41762	-4.83391	-3.54916
ENSG00000149485	-6.74003	-4.83524	-2.93045	-2.93045	-4.86631	-3.57702
ENSG00000025708	-6.30046	-4.46893	-2.71066	-2.71066	-4.87407	-3.58212
ENSG00000090104	-7.61916	-5.12828	-2.93045	-2.93045	-4.92554	-3.63404
ENSG00000010278	-6.74003	-4.54219	-2.6374	-2.6374	-4.96986	-3.68125
ENSG00000153234	-7.1796	-5.20155	-3.15023	-3.15023	-4.99553	-3.70343
ENSG00000167642	-6.59351	-4.76198	-2.93045	-2.93045	-5.0808	-3.76061
ENSG00000147168	-6.44699	-4.39567	-2.71066	-2.71066	-5.16531	-3.84188
ENSG00000125740	-6.66677	-4.68872	-2.93045	-2.93045	-5.16736	-3.84188
ENSG00000234745	-6.81329	-4.76198	-2.85719	-2.85719	-5.1954	-3.85927
ENSG00000169116	-6.81329	-4.83524	-3.07697	-3.07697	-5.29052	-3.97487
ENSG00000104419	-6.30046	-4.46893	-2.93045	-2.93045	-5.37246	-4.07223
ENSG00000196628	-6.30046	-4.32241	-2.71066	-2.71066	-5.38671	-4.08152
ENSG00000110047	-6.37372	-4.54219	-2.85719	-2.85719	-5.42788	-4.12521
ENSG00000099860	-6.52025	-4.61546	-2.93045	-2.93045	-5.55419	-4.25717
ENSG00000152689	-7.83895	-5.78763	-3.66306	-3.66306	-5.59783	-4.29074
ENSG00000134107	-6.95981	-4.9085	-3.15023	-3.15023	-5.86383	-4.60385
ENSG00000039068	-7.32612	-5.34807	-3.5898	-3.5898	-6.29142	-5.10724
ENSG00000187239	-6.66677	-4.76198	-3.22349	-3.22349	-6.30621	-5.11222
ENSG00000175471	-8.05873	-5.78763	-3.73632	-3.73632	-6.34537	-5.14602
ENSG00000172345	-7.61916	-5.64111	-3.80958	-3.80958	-6.46356	-5.22187
ENSG00000175898	-7.61916	-5.34807	-3.51654	-3.51654	-6.52187	-5.27152
ENSG00000117090	-8.42504	-6.30046	-4.39567	-4.39567	-6.84189	-5.57774
ENSG00000019582	-8.05873	-6.00742	-4.17589	-4.17589	-6.91799	-5.63162
ENSG00000023445	-8.93787	-6.66677	-4.68872	-4.68872	-7.15692	-5.87271
