# Supplementary material for: Linking transcriptional and genetic tumor heterogeneity through allele analysis of single-cell RNA-seq data
Source: HighWire-hosted journal article supplement (doi:10.1101/gr.228080.117), 2018-06-13
Supplement: Supplemental_Tables.zip [file Supplemental_Table_S6.xlsx]

## Sheet: MSigDB
	p.val	q.val	sscore	edge
BHATI_G2M_ARREST_BY_2METHOXYESTRADIOL_UP	0.00079992	0.00837198	1.21148	1.39933
WHITEFORD_PEDIATRIC_CANCER_MARKERS	9.999e-05	0.00160879	2.57028	0.998391
REACTOME_EXTENSION_OF_TELOMERES	0.00029997	0.00399219	1.29377	1.01004
GSE36476_CTRL_VS_TSST_ACT_72H_MEMORY_CD4_TCELL_YOUNG_DN	9.999e-05	0.00160879	2.12057	0.821782
SHEPARD_CRUSH_AND_BURN_MUTANT_DN	9.999e-05	0.00160879	1.42106	1.05463
GSE7764_NKCELL_VS_SPLENOCYTE_DN	0.00029997	0.00399219	1.37062	0.82428
GSE17974_CTRL_VS_ACT_IL4_AND_ANTI_IL12_48H_CD4_TCELL_DN	9.999e-05	0.00160879	1.34926	0.857569
CUI_TCF21_TARGETS_2_UP	9.999e-05	0.00160879	1.85695	0.726183
GOBERT_OLIGODENDROCYTE_DIFFERENTIATION_UP	9.999e-05	0.00160879	3.72011	0.777805
KAECH_NAIVE_VS_DAY8_EFF_CD8_TCELL_DN	0.00019998	0.00286483	1.37118	2.31511
BENPORATH_MYC_MAX_TARGETS	0.00789921	0.0451743	1.03675	0.932434
CELL_CYCLE_GO_0007049	9.999e-05	0.00160879	1.61927	0.998391
FEVR_CTNNB1_TARGETS_DN	9.999e-05	0.00160879	2.30512	0.994924
WEST_ADRENOCORTICAL_TUMOR_MARKERS_UP	0.00359964	0.0257407	1.09617	2.95664
REACTOME_DOUBLE_STRAND_BREAK_REPAIR	0.00259974	0.0204937	1.12477	1.04188
VEGF_A_UP.V1_DN	9.999e-05	0.00160879	1.46456	0.689459
KRIEG_HYPOXIA_NOT_VIA_KDM3A	0.00649935	0.0391413	1.04398	0.774681
CHEMNITZ_RESPONSE_TO_PROSTAGLANDIN_E2_UP	9.999e-05	0.00160879	1.94267	0.995251
ZHOU_CELL_CYCLE_GENES_IN_IR_RESPONSE_24HR	9.999e-05	0.00160879	2.05304	1.05463
MALONEY_RESPONSE_TO_17AAG_DN	0.00229977	0.0186402	1.12807	1.10955
GSE27786_LIN_NEG_VS_CD4_TCELL_UP	0.0009999	0.00993449	1.24746	0.792717
CHROMOSOME_SEGREGATION	0.00259974	0.0204937	1.11541	0.998391
GSE17721_CTRL_VS_LPS_2H_BMDM_UP	0.00559944	0.0350942	1.07885	0.50671
CHICAS_RB1_TARGETS_SENESCENT	9.999e-05	0.00160879	1.80981	0.710105
GOLDRATH_ANTIGEN_RESPONSE	9.999e-05	0.00160879	2.3942	0.995251
LEE_EARLY_T_LYMPHOCYTE_UP	9.999e-05	0.00160879	2.65304	1.34129
GSE3982_MAST_CELL_VS_BASOPHIL_UP	0.00469953	0.0312722	1.08131	0.576414
ENVELOPE	0.00069993	0.00747054	1.29488	0.882171
KEGG_NUCLEOTIDE_EXCISION_REPAIR	0.00059994	0.00671933	1.27635	1.18155
WHITFIELD_CELL_CYCLE_S	9.999e-05	0.00160879	1.58409	0.495707
REN_BOUND_BY_E2F	9.999e-05	0.00160879	1.59819	1.19294
NUCLEAR_LUMEN	0.00039996	0.00502807	1.32313	0.995251
LEE_LIVER_CANCER_SURVIVAL_DN	9.999e-05	0.00160879	1.42046	1.42893
REACTOME_TRANSPORT_OF_MATURE_TRANSCRIPT_TO_CYTOPLASM	0.00059994	0.00671933	1.21683	1.45918
MONTERO_THYROID_CANCER_POOR_SURVIVAL_UP	9.999e-05	0.00160879	1.40039	2.95664
REGULATION_OF_DNA_METABOLIC_PROCESS	0.00149985	0.0135869	1.1431	0.903969
POOLA_INVASIVE_BREAST_CANCER_UP	9.999e-05	0.00160879	1.59383	1.19294
WAKASUGI_HAVE_ZNF143_BINDING_SITES	0.00019998	0.00286483	1.31741	0.67083
WEI_MYCN_TARGETS_WITH_E_BOX	9.999e-05	0.00160879	1.67812	0.433942
MITSIADES_RESPONSE_TO_APLIDIN_DN	9.999e-05	0.00160879	2.25949	0.995251
WANG_RESPONSE_TO_GSK3_INHIBITOR_SB216763_DN	9.999e-05	0.00160879	2.581	0.995251
GREENBAUM_E2A_TARGETS_UP	0.00079992	0.00837198	1.22371	1.5648
CELL_CYCLE_PROCESS	9.999e-05	0.00160879	1.81837	0.998391
GSE3982_CTRL_VS_LPS_4H_MAC_UP	0.00089991	0.00913038	1.25432	1.05463
GOTZMANN_EPITHELIAL_TO_MESENCHYMAL_TRANSITION_UP	9.999e-05	0.00160879	1.34768	1.98021
PYEON_CANCER_HEAD_AND_NECK_VS_CERVICAL_UP	0.00289971	0.0220521	1.11713	0.682524
GSE7460_CD8_TCELL_VS_TREG_ACT_DN	9.999e-05	0.00160879	1.47231	1.37755
REACTOME_SYNTHESIS_OF_DNA	9.999e-05	0.00160879	1.43032	1.18155
REACTOME_GLOBAL_GENOMIC_NER_GG_NER	0.00109989	0.0106339	1.16418	1.18155
KAUFFMANN_MELANOMA_RELAPSE_UP	9.999e-05	0.00160879	1.48381	0.995251
REACTOME_KINESINS	0.00309969	0.0229654	1.09051	1.74892
FERREIRA_EWINGS_SARCOMA_UNSTABLE_VS_STABLE_UP	9.999e-05	0.00160879	2.17533	0.995251
CYTOSKELETAL_PART	0.00029997	0.00399219	1.30662	0.868895
FINETTI_BREAST_CANCER_KINOME_RED	0.00089991	0.00913038	1.28839	1.37755
DNA_PACKAGING	0.00619938	0.0378101	1.043	2.31511
STEIN_ESRRA_TARGETS_RESPONSIVE_TO_ESTROGEN_DN	9.999e-05	0.00160879	1.44746	1.8964
VANTVEER_BREAST_CANCER_ESR1_DN	0.00229977	0.0186402	1.15851	0.774681
REACTOME_ACTIVATION_OF_ATR_IN_RESPONSE_TO_REPLICATION_STRESS	0.00049995	0.00600497	1.26132	1.26774
RUIZ_TNC_TARGETS_DN	9.999e-05	0.00160879	2.25437	1.26774
REACTOME_MITOTIC_PROMETAPHASE	9.999e-05	0.00160879	1.69081	1.31356
ODONNELL_TARGETS_OF_MYC_AND_TFRC_DN	0.00059994	0.00671933	1.33691	0.850385
FRASOR_RESPONSE_TO_SERM_OR_FULVESTRANT_DN	0.00179982	0.0154907	1.18184	0.995251
COLINA_TARGETS_OF_4EBP1_AND_4EBP2	0.00709929	0.0419344	1.04423	0.816977
BORCZUK_MALIGNANT_MESOTHELIOMA_UP	0.0009999	0.00993449	1.22748	0.710105
NUCLEUS	9.999e-05	0.00160879	1.50581	0.882171
KONG_E2F3_TARGETS	9.999e-05	0.00160879	2.31032	1.19294
KYNG_WERNER_SYNDROM_AND_NORMAL_AGING_UP	0.00469953	0.0312722	1.06972	1.98021
REACTOME_CELL_CYCLE_MITOTIC	9.999e-05	0.00160879	2.34125	1.12017
GSE29614_DAY3_VS_DAY7_TIV_FLU_VACCINE_PBMC_DN	9.999e-05	0.00160879	1.80934	1.35879
GSE17974_0H_VS_24H_IN_VITRO_ACT_CD4_TCELL_DN	0.00019998	0.00286483	1.53337	1.04188
MICROTUBULE_CYTOSKELETON	0.00189981	0.0162217	1.18088	0.868895
HADDAD_T_LYMPHOCYTE_AND_NK_PROGENITOR_DN	0.00459954	0.0308929	1.10376	0.828618
NUCLEOPLASM_PART	0.00419958	0.0291135	1.09745	0.995251
GSE7852_LN_VS_THYMUS_TCONV_DN	9.999e-05	0.00160879	1.85309	0.998391
NEMETH_INFLAMMATORY_RESPONSE_LPS_DN	9.999e-05	0.00160879	1.35042	1.46275
GOLDRATH_EFF_VS_MEMORY_CD8_TCELL_UP	9.999e-05	0.00160879	2.37866	0.903969
KAECH_DAY8_EFF_VS_MEMORY_CD8_TCELL_UP	9.999e-05	0.00160879	1.88529	0.995251
GSE17721_LPS_VS_POLYIC_8H_BMDM_UP	0.00439956	0.0301125	1.08367	0.922841
GSE17721_LPS_VS_CPG_16H_BMDM_DN	0.00219978	0.0180332	1.15954	2.00882
REACTOME_REMOVAL_OF_THE_FLAP_INTERMEDIATE_FROM_THE_C_STRAND	0.00039996	0.00502807	1.27636	1.18155
PRC2_EZH2_UP.V1_UP	9.999e-05	0.00160879	1.89852	1.39933
TUBULIN_BINDING	0.00779922	0.0447806	1.03284	0.868895
AMUNDSON_GENOTOXIC_SIGNATURE	0.00589941	0.0364445	1.05679	1.10955
GSE27786_LIN_NEG_VS_BCELL_UP	0.00019998	0.00286483	1.40947	0.903969
HILLION_HMGA1B_TARGETS	0.00439956	0.0301125	1.07096	0.963059
REACTOME_TRANSCRIPTION_COUPLED_NER_TC_NER	0.00109989	0.0106339	1.16418	1.18155
KAUFFMANN_DNA_REPAIR_GENES	9.999e-05	0.00160879	1.61839	0.663842
LIAO_METASTASIS	9.999e-05	0.00160879	1.43969	0.530772
TSAI_RESPONSE_TO_IONIZING_RADIATION	0.00059994	0.00671933	1.25186	1.34129
GSE3982_MEMORY_CD4_TCELL_VS_TH1_DN	9.999e-05	0.00160879	1.65299	1.34129
GRADE_COLON_AND_RECTAL_CANCER_UP	9.999e-05	0.00160879	1.58037	0.84075
GSE3982_EOSINOPHIL_VS_DC_DN	0.00589941	0.0364445	1.05021	0.932434
RESPONSE_TO_DNA_DAMAGE_STIMULUS	0.00069993	0.00747054	1.31341	0.67083
KAMMINGA_EZH2_TARGETS	0.00049995	0.00600497	1.25299	0.998391
MITOSIS	9.999e-05	0.00160879	1.43075	0.998391
PUJANA_BREAST_CANCER_LIT_INT_NETWORK	0.00179982	0.0154907	1.15991	1.10955
MEMBRANE_ENCLOSED_LUMEN	9.999e-05	0.00160879	1.58805	0.965866
MARTENS_TRETINOIN_RESPONSE_DN	0.00189981	0.0162217	1.17037	1.41276
GSE24634_TREG_VS_TCONV_POST_DAY10_IL4_CONVERSION_UP	0.00029997	0.00399219	1.32336	0.903969
GSE25087_FETAL_VS_ADULT_TCONV_UP	0.00689931	0.0409777	1.04429	1.24417
GSE3982_MAST_CELL_VS_TH2_DN	9.999e-05	0.00160879	1.59978	1.52431
MITOCHONDRION	0.0029997	0.0224561	1.11745	1.03809
GSE36476_CTRL_VS_TSST_ACT_72H_MEMORY_CD4_TCELL_OLD_DN	9.999e-05	0.00160879	2.44057	1.18155
KAECH_DAY8_EFF_VS_DAY15_EFF_CD8_TCELL_UP	9.999e-05	0.00160879	1.51472	0.882171
IVANOVA_HEMATOPOIESIS_LATE_PROGENITOR	0.00139986	0.0128704	1.17365	0.745778
GSE12366_GC_VS_MEMORY_BCELL_UP	9.999e-05	0.00160879	1.73703	0.710105
CHROMOSOMAL_PART	0.00469953	0.0312722	1.07704	1.37755
KAUFFMANN_DNA_REPLICATION_GENES	0.00039996	0.00502807	1.30202	0.995251
GSE17974_1H_VS_72H_UNTREATED_IN_VITRO_CD4_TCELL_DN	0.00459954	0.0308929	1.07143	0.821782
GSE360_L_MAJOR_VS_T_GONDII_MAC_DN	0.0019998	0.016744	1.17955	0.995251
GSE17974_2H_VS_72H_UNTREATED_IN_VITRO_CD4_TCELL_DN	0.00169983	0.014928	1.21471	0.728167
REACTOME_RESOLUTION_OF_AP_SITES_VIA_THE_MULTIPLE_NUCLEOTIDE_PATCH_REPLACEMENT_PATHWAY	0.00829917	0.0469017	1.02151	0.707415
PUIFFE_INVASION_INHIBITED_BY_ASCITES_UP	0.0029997	0.0224561	1.12575	1.10955
BIOCARTA_ATM_PATHWAY	0.00649935	0.0391413	1.02415	1.28162
HEDENFALK_BREAST_CANCER_BRCA1_VS_BRCA2	0.00729927	0.0427062	1.03915	1.42893
CHIARETTI_T_ALL_RELAPSE_PROGNOSIS	0.00639936	0.0388648	1.03872	0.710105
CHROMOSOME	0.00049995	0.00600497	1.3239	1.37755
GSE3982_NKCELL_VS_TH2_DN	0.00039996	0.00502807	1.44993	0.903969
REACTOME_MITOTIC_M_M_G1_PHASES	9.999e-05	0.00160879	1.96568	1.26774
TANG_SENESCENCE_TP53_TARGETS_DN	9.999e-05	0.00160879	1.7091	1.19294
WINNEPENNINCKX_MELANOMA_METASTASIS_UP	9.999e-05	0.00160879	2.49312	1.01658
LI_WILMS_TUMOR_VS_FETAL_KIDNEY_1_DN	9.999e-05	0.00160879	1.65567	0.995251
GSE17974_1.5H_VS_72H_IL4_AND_ANTI_IL12_ACT_CD4_TCELL_DN	9.999e-05	0.00160879	1.30661	0.550809
BLUM_RESPONSE_TO_SALIRASIB_DN	9.999e-05	0.00160879	2.29682	0.995251
GSE15930_NAIVE_VS_24H_IN_VITRO_STIM_IL12_CD8_TCELL_DN	9.999e-05	0.00160879	1.41726	0.562723
REACTOME_DEPOSITION_OF_NEW_CENPA_CONTAINING_NUCLEOSOMES_AT_THE_CENTROMERE	0.00169983	0.014928	1.18078	1.31356
GSE3982_CENT_MEMORY_CD4_TCELL_VS_TH1_DN	0.00029997	0.00399219	1.29306	0.998391
HAHTOLA_SEZARY_SYNDROM_UP	0.00059994	0.00671933	1.22457	1.43262
GSE1460_INTRATHYMIC_T_PROGENITOR_VS_NAIVE_CD4_TCELL_CORD_BLOOD_UP	0.00139986	0.0128704	1.22349	1.26774
GSE24634_NAIVE_CD4_TCELL_VS_DAY3_IL4_CONV_TREG_DN	9.999e-05	0.00160879	1.67948	0.675458
DITTMER_PTHLH_TARGETS_UP	0.00039996	0.00502807	1.25348	1.03809
DEURIG_T_CELL_PROLYMPHOCYTIC_LEUKEMIA_UP	0.00029997	0.00399219	1.39467	1.38241
GSE12845_NAIVE_VS_PRE_GC_TONSIL_BCELL_DN	0.00469953	0.0312722	1.07461	0.430102
MARKEY_RB1_CHRONIC_LOF_UP	0.00529947	0.0336049	1.06969	1.19294
GSE3982_EOSINOPHIL_VS_TH1_DN	0.00019998	0.00286483	1.35172	0.562723
GSE15930_NAIVE_VS_48H_IN_VITRO_STIM_CD8_TCELL_DN	9.999e-05	0.00160879	1.94081	0.882171
CHANG_CORE_SERUM_RESPONSE_UP	9.999e-05	0.00160879	1.57684	0.576414
GSE12845_IGD_POS_BLOOD_VS_PRE_GC_TONSIL_BCELL_DN	9.999e-05	0.00160879	2.3077	0.998391
GSE25087_TREG_VS_TCONV_FETUS_DN	0.00109989	0.0106339	1.14863	1.85987
SPINDLE	0.00069993	0.00747054	1.21087	1.3837
GSE15930_NAIVE_VS_24H_IN_VITRO_STIM_INFAB_CD8_TCELL_DN	9.999e-05	0.00160879	1.43063	1.18155
MILI_PSEUDOPODIA_HAPTOTAXIS_UP	0.00269973	0.0208999	1.14734	0.530772
RHEIN_ALL_GLUCOCORTICOID_THERAPY_DN	9.999e-05	0.00160879	1.93738	1.37755
CROONQUIST_NRAS_SIGNALING_DN	9.999e-05	0.00160879	2.02452	0.995251
REACTOME_CELL_CYCLE_CHECKPOINTS	9.999e-05	0.00160879	1.5109	0.663842
GSE28237_FOLLICULAR_VS_EARLY_GC_BCELL_DN	0.00339966	0.024555	1.1095	0.474466
ZHANG_TLX_TARGETS_60HR_DN	9.999e-05	0.00160879	2.82672	1.19294
MICROTUBULE_BASED_PROCESS	0.00039996	0.00502807	1.32538	1.10955
GOLDRATH_NAIVE_VS_EFF_CD8_TCELL_DN	9.999e-05	0.00160879	1.84366	0.995251
REACTOME_G1_S_SPECIFIC_TRANSCRIPTION	9.999e-05	0.00160879	1.41165	1.26774
BURTON_ADIPOGENESIS_PEAK_AT_16HR	0.00059994	0.00671933	1.30272	0.99884
LY_AGING_MIDDLE_DN	0.00089991	0.00913038	1.22351	1.39933
WHITFIELD_CELL_CYCLE_G2	9.999e-05	0.00160879	1.46182	0.998391
SOTIRIOU_BREAST_CANCER_GRADE_1_VS_3_UP	9.999e-05	0.00160879	2.43665	0.903046
GSE17721_POLYIC_VS_CPG_8H_BMDM_DN	0.00809919	0.0461344	1.02921	1.84977
GSE11924_TFH_VS_TH2_CD4_TCELL_DN	0.00269973	0.0208999	1.15522	0.922841
JAZAG_TGFB1_SIGNALING_UP	9.999e-05	0.00160879	1.36888	1.47148
OLSSON_E2F3_TARGETS_DN	9.999e-05	0.00160879	1.35945	1.39933
GSE30962_PRIMARY_VS_SECONDARY_CHRONIC_LCMV_INF_CD8_TCELL_UP	0.0049995	0.0325156	1.07284	2.34492
MANALO_HYPOXIA_DN	9.999e-05	0.00160879	1.7188	0.710105
GSE10239_MEMORY_VS_DAY4.5_EFF_CD8_TCELL_DN	0.00069993	0.00747054	1.26285	0.474466
CAFFAREL_RESPONSE_TO_THC_24HR_5_DN	0.00029997	0.00399219	1.32613	2.37286
KEGG_MISMATCH_REPAIR	0.00319968	0.0233848	1.09052	1.18155
GSE12845_IGD_POS_VS_NEG_BLOOD_BCELL_DN	0.00269973	0.0208999	1.15081	1.52431
LE_NEURONAL_DIFFERENTIATION_DN	0.0019998	0.016744	1.11553	1.66241
GSE15750_DAY6_VS_DAY10_EFF_CD8_TCELL_UP	9.999e-05	0.00160879	2.67564	0.998391
DOUBLE_STRAND_BREAK_REPAIR	0.00479952	0.0316445	1.0681	0.903969
GSE17974_CTRL_VS_ACT_IL4_AND_ANTI_IL12_24H_CD4_TCELL_DN	9.999e-05	0.00160879	1.61547	0.857569
CHIANG_LIVER_CANCER_SUBCLASS_UNANNOTATED_DN	9.999e-05	0.00160879	1.43835	1.39803
PUJANA_BRCA2_PCC_NETWORK	9.999e-05	0.00160879	2.2153	0.995251
GSE24634_IL4_VS_CTRL_TREATED_NAIVE_CD4_TCELL_DAY7_UP	9.999e-05	0.00160879	1.9469	1.19294
GSE15930_NAIVE_VS_72H_IN_VITRO_STIM_TRICHOSTATINA_CD8_TCELL_DN	0.00019998	0.00286483	1.46801	1.43262
KINSEY_TARGETS_OF_EWSR1_FLII_FUSION_UP	9.999e-05	0.00160879	3.7444	0.903969
GSE27786_LSK_VS_BCELL_UP	0.00689931	0.0409777	1.0415	0.755525
JOHNSTONE_PARVB_TARGETS_2_DN	0.00109989	0.0106339	1.19649	0.998391
AMUNDSON_GAMMA_RADIATION_RESPONSE	0.00269973	0.0208999	1.12109	0.998391
MOLENAAR_TARGETS_OF_CCND1_AND_CDK4_DN	9.999e-05	0.00160879	1.69556	1.01658
FARMER_BREAST_CANCER_CLUSTER_2	9.999e-05	0.00160879	1.72066	1.37755
PYEON_HPV_POSITIVE_TUMORS_UP	0.0069993	0.0414574	1.04532	1.43262
OXFORD_RALA_OR_RALB_TARGETS_UP	9.999e-05	0.00160879	1.79023	1.38241
GSE7764_IL15_TREATED_VS_CTRL_NK_CELL_24H_UP	9.999e-05	0.00160879	1.7569	0.99884
GSE1460_NAIVE_CD4_TCELL_ADULT_BLOOD_VS_THYMIC_STROMAL_CELL_DN	0.00039996	0.00502807	1.28904	0.604166
REACTOME_MITOTIC_G1_G1_S_PHASES	0.00019998	0.00286483	1.45657	1.26774
REACTOME_NEP_NS2_INTERACTS_WITH_THE_CELLULAR_EXPORT_MACHINERY	0.00059994	0.00671933	1.21683	1.45918
VANTVEER_BREAST_CANCER_POOR_PROGNOSIS	9.999e-05	0.00160879	1.27812	1.91785
PAL_PRMT5_TARGETS_UP	0.00179982	0.0154907	1.16137	1.10955
SANSOM_APC_TARGETS_REQUIRE_MYC	0.00559944	0.0350942	1.07321	0.494492
RICKMAN_TUMOR_DIFFERENTIATED_MODERATELY_VS_POORLY_UP	0.00809919	0.0461344	1.02229	0.998391
CSR_LATE_UP.V1_UP	9.999e-05	0.00160879	1.62791	1.00085
GSE3982_EOSINOPHIL_VS_MAST_CELL_DN	0.0019998	0.016744	1.17321	0.776322
GSE17974_0H_VS_12H_IN_VITRO_ACT_CD4_TCELL_DN	0.00019998	0.00286483	1.37827	0.548093
GSE15750_DAY6_VS_DAY10_TRAF6KO_EFF_CD8_TCELL_UP	9.999e-05	0.00160879	2.85516	0.903969
REICHERT_MITOSIS_LIN9_TARGETS	9.999e-05	0.00160879	1.48228	1.46275
GSE31082_DN_VS_CD4_SP_THYMOCYTE_UP	0.00049995	0.00600497	1.29257	0.792387
MITOCHONDRIAL_PART	0.00369963	0.0263683	1.12091	1.03809
SU_TESTIS	0.00239976	0.0194142	1.15151	1.37755
REACTOME_MHC_CLASS_II_ANTIGEN_PRESENTATION	0.00259974	0.0204937	1.09326	1.74892
GSE14308_TH2_VS_TH17_UP	0.00779922	0.0447806	1.02196	0.777805
MICROTUBULE	0.00449955	0.0305544	1.08246	1.3837
KEGG_DNA_REPLICATION	0.00019998	0.00286483	1.37825	1.18155
BROWNE_HCMV_INFECTION_2HR_DN	0.00889911	0.0496416	1.00714	1.19294
SMITH_LIVER_CANCER	0.00579942	0.0360333	1.05333	0.882171
NUYTTEN_EZH2_TARGETS_DN	9.999e-05	0.00160879	2.25817	0.857569
CYTOPLASM	9.999e-05	0.00160879	1.61107	0.84075
GRAESSMANN_RESPONSE_TO_MC_AND_DOXORUBICIN_DN	9.999e-05	0.00160879	1.86762	0.850385
RB_P107_DN.V1_DN	0.0019998	0.016744	1.14577	0.781669
VECCHI_GASTRIC_CANCER_EARLY_UP	9.999e-05	0.00160879	2.74857	0.717404
ODONNELL_TFRC_TARGETS_DN	9.999e-05	0.00160879	1.76672	0.850385
MITOTIC_CELL_CYCLE	9.999e-05	0.00160879	1.69423	0.998391
GSE11924_TFH_VS_TH17_CD4_TCELL_DN	0.00179982	0.0154907	1.17433	1.08074
ACEVEDO_LIVER_CANCER_WITH_H3K9ME3_DN	0.00519948	0.0330681	1.066	2.36629
PROTEIN_KINASE_BINDING	0.00519948	0.0330681	1.05902	0.774681
GSE36476_CTRL_VS_TSST_ACT_16H_MEMORY_CD4_TCELL_YOUNG_DN	0.00059994	0.00671933	1.26719	0.821782
GSE13411_IGM_MEMORY_BCELL_VS_PLASMA_CELL_DN	0.00349965	0.0251508	1.10424	0.99884
PID_FANCONI_PATHWAY	0.00179982	0.0154907	1.14775	1.04188
SCIBETTA_KDM5B_TARGETS_DN	0.0029997	0.0224561	1.14373	1.37755
KANG_DOXORUBICIN_RESISTANCE_UP	9.999e-05	0.00160879	2.06911	0.99884
REACTOME_PROCESSIVE_SYNTHESIS_ON_THE_LAGGING_STRAND	0.00039996	0.00502807	1.27636	1.18155
GSE339_CD4POS_VS_CD4CD8DN_DC_DN	0.00119988	0.011472	1.18821	1.41865
GSE360_DC_VS_MAC_L_MAJOR_UP	0.00509949	0.0329177	1.07539	0.53227
CAFFAREL_RESPONSE_TO_THC_DN	0.00059994	0.00671933	1.20142	2.37286
CHIANG_LIVER_CANCER_SUBCLASS_PROLIFERATION_UP	9.999e-05	0.00160879	2.17153	1.37755
SONG_TARGETS_OF_IE86_CMV_PROTEIN	9.999e-05	0.00160879	1.83595	1.18155
GSE27786_LIN_NEG_VS_CD8_TCELL_UP	0.00089991	0.00913038	1.23163	0.903969
KOBAYASHI_EGFR_SIGNALING_24HR_DN	9.999e-05	0.00160879	3.06835	0.995251
KEGG_PYRIMIDINE_METABOLISM	0.0039996	0.0280427	1.08637	0.994924
SENGUPTA_NASOPHARYNGEAL_CARCINOMA_UP	9.999e-05	0.00160879	2.20466	0.930469
IWANAGA_E2F1_TARGETS_INDUCED_BY_SERUM	0.00489951	0.0320587	1.10273	1.26759
BUYTAERT_PHOTODYNAMIC_THERAPY_STRESS_DN	0.00059994	0.00671933	1.2838	0.903046
ALCALAY_AML_BY_NPM1_LOCALIZATION_DN	0.00019998	0.00286483	1.55219	1.19294
GSE22886_NAIVE_BCELL_VS_BLOOD_PLASMA_CELL_DN	9.999e-05	0.00160879	1.70565	1.25175
SARRIO_EPITHELIAL_MESENCHYMAL_TRANSITION_UP	9.999e-05	0.00160879	2.27468	0.857569
MACROMOLECULAR_COMPLEX	9.999e-05	0.00160879	1.61536	0.903969
STARK_PREFRONTAL_CORTEX_22Q11_DELETION_DN	0.00089991	0.00913038	1.23881	0.644245
JOHNSTONE_PARVB_TARGETS_3_DN	9.999e-05	0.00160879	2.99862	0.791513
GSE1460_INTRATHYMIC_T_PROGENITOR_VS_NAIVE_CD4_TCELL_ADULT_BLOOD_UP	0.00309969	0.0229654	1.13927	0.995251
GSE3982_BASOPHIL_VS_TH1_DN	9.999e-05	0.00160879	1.36151	0.726183
REGULATION_OF_MITOSIS	0.00079992	0.00837198	1.19767	1.37755
GSE12845_IGD_POS_BLOOD_VS_DARKZONE_GC_TONSIL_BCELL_DN	0.00179982	0.0154907	1.16489	0.446534
CROONQUIST_IL6_DEPRIVATION_DN	9.999e-05	0.00160879	2.20585	0.995251
SUNG_METASTASIS_STROMA_DN	0.00049995	0.00600497	1.27957	1.84977
HERNANDEZ_MITOTIC_ARREST_BY_DOCETAXEL_1_DN	0.00049995	0.00600497	1.28102	1.18155
GSE24634_NAIVE_CD4_TCELL_VS_DAY10_IL4_CONV_TREG_DN	9.999e-05	0.00160879	1.79487	1.01658
MISSIAGLIA_REGULATED_BY_METHYLATION_DN	9.999e-05	0.00160879	1.9127	0.998391
REACTOME_CELL_CYCLE	9.999e-05	0.00160879	2.40852	1.01004
GSE22886_IGM_MEMORY_BCELL_VS_BM_PLASMA_CELL_UP	0.00279972	0.021443	1.13146	1.91511
WONG_EMBRYONIC_STEM_CELL_CORE	9.999e-05	0.00160879	2.52458	0.995251
NON_MEMBRANE_BOUND_ORGANELLE	9.999e-05	0.00160879	1.68106	1.37755
JACKSON_DNMT1_TARGETS_UP	0.00129987	0.0121584	1.15571	1.19294
BENPORATH_SOX2_TARGETS	0.00029997	0.00399219	1.38182	0.455771
MARKEY_RB1_ACUTE_LOF_DN	9.999e-05	0.00160879	2.24511	0.998391
GSE22886_UNSTIM_VS_IL15_STIM_NKCELL_DN	9.999e-05	0.00160879	1.78479	0.610964
ORGANELLE_PART	9.999e-05	0.00160879	2.39664	0.868895
WILCOX_PRESPONSE_TO_ROGESTERONE_UP	0.00039996	0.00502807	1.29811	1.5648
GSE36476_CTRL_VS_TSST_ACT_40H_MEMORY_CD4_TCELL_OLD_DN	9.999e-05	0.00160879	2.1449	0.84075
ROSTY_CERVICAL_CANCER_PROLIFERATION_CLUSTER	9.999e-05	0.00160879	2.92313	0.998391
FOURNIER_ACINAR_DEVELOPMENT_LATE_2	9.999e-05	0.00160879	1.82364	0.903969
VANTVEER_BREAST_CANCER_METASTASIS_DN	9.999e-05	0.00160879	1.77475	1.19294
NAKAMURA_TUMOR_ZONE_PERIPHERAL_VS_CENTRAL_UP	9.999e-05	0.00160879	1.70232	0.857569
GSE3982_BCELL_VS_TH1_DN	0.00149985	0.0135869	1.19831	0.99884
MICROTUBULE_CYTOSKELETON_ORGANIZATION_AND_BIOGENESIS	9.999e-05	0.00160879	1.20766	2.63984
CYTOSKELETON_ORGANIZATION_AND_BIOGENESIS	0.0019998	0.016744	1.18632	1.10955
GSE22886_NAIVE_CD4_TCELL_VS_48H_ACT_TH2_DN	0.00569943	0.0354631	1.06411	0.451261
REACTOME_GLUCOSE_TRANSPORT	0.00059994	0.00671933	1.21683	1.45918
GSE20715_0H_VS_48H_OZONE_TLR4_KO_LUNG_DN	0.00519948	0.0330681	1.08026	1.10955
PID_MYC_ACTIVPATHWAY	0.0039996	0.0280427	1.10648	1.01004
PATIL_LIVER_CANCER	9.999e-05	0.00160879	2.45135	0.995251
ZHANG_BREAST_CANCER_PROGENITORS_UP	9.999e-05	0.00160879	1.6705	0.618518
REACTOME_DNA_REPAIR	9.999e-05	0.00160879	1.46603	1.04188
TOYOTA_TARGETS_OF_MIR34B_AND_MIR34C	9.999e-05	0.00160879	1.90262	0.965866
LI_WILMS_TUMOR_ANAPLASTIC_UP	0.00109989	0.0106339	1.24681	1.10955
ZHOU_CELL_CYCLE_GENES_IN_IR_RESPONSE_6HR	9.999e-05	0.00160879	1.60135	1.39933
ORGANELLE_MEMBRANE	0.00029997	0.00399219	1.42277	0.922841
HESS_TARGETS_OF_HOXA9_AND_MEIS1_UP	0.0009999	0.00993449	1.22921	1.01004
PENG_LEUCINE_DEPRIVATION_DN	0.00669933	0.0400659	1.03836	0.903969
GSE12366_GC_VS_NAIVE_BCELL_UP	9.999e-05	0.00160879	1.96813	0.758121
BENPORATH_NOS_TARGETS	0.00849915	0.0478438	1.01714	0.455771
ATF2_UP.V1_UP	0.00149985	0.0135869	1.19519	1.19294
LINDGREN_BLADDER_CANCER_CLUSTER_3_UP	9.999e-05	0.00160879	2.33618	0.944894
WANG_TUMOR_INVASIVENESS_UP	0.00129987	0.0121584	1.19227	0.998391
REACTOME_TRANSPORT_OF_MATURE_MRNA_DERIVED_FROM_AN_INTRONLESS_TRANSCRIPT	0.00059994	0.00671933	1.21683	1.45918
REACTOME_NUCLEOTIDE_EXCISION_REPAIR	0.00109989	0.0106339	1.16418	1.18155
ORGANELLE_ENVELOPE	0.00069993	0.00747054	1.29488	0.882171
SHEN_SMARCA2_TARGETS_UP	0.00139986	0.0128704	1.1648	0.652262
BENPORATH_CYCLING_GENES	9.999e-05	0.00160879	2.31537	0.995251
MTOR_UP.V1_UP	0.00469953	0.0312722	1.07432	1.84418
MORI_PRE_BI_LYMPHOCYTE_UP	9.999e-05	0.00160879	1.81441	1.74892
MITOTIC_SISTER_CHROMATID_SEGREGATION	0.00259974	0.0204937	1.11541	0.998391
DANG_REGULATED_BY_MYC_UP	0.00079992	0.00837198	1.28692	0.817082
GSE3982_EFF_MEMORY_CD4_TCELL_VS_TH2_DN	0.00279972	0.021443	1.13352	2.36629
GCNP_SHH_UP_EARLY.V1_UP	0.00169983	0.014928	1.17308	1.28162
REACTOME_METABOLISM_OF_NON_CODING_RNA	0.00129987	0.0121584	1.17733	1.45918
BENPORATH_NANOG_TARGETS	0.00029997	0.00399219	1.34943	0.455771
PENG_RAPAMYCIN_RESPONSE_DN	9.999e-05	0.00160879	1.70095	0.835708
REACTOME_MEIOTIC_RECOMBINATION	0.00559944	0.0350942	1.03442	1.28162
ESTABLISHMENT_AND_OR_MAINTENANCE_OF_CHROMATIN_ARCHITECTURE	0.00019998	0.00286483	1.35216	0.903969
M_PHASE	9.999e-05	0.00160879	1.73884	0.998391
RB_P107_DN.V1_UP	9.999e-05	0.00160879	1.65757	1.46275
ROME_INSULIN_TARGETS_IN_MUSCLE_UP	0.00089991	0.00913038	1.25147	0.652262
GSE34205_HEALTHY_VS_RSV_INF_INFANT_PBMC_DN	9.999e-05	0.00160879	1.54103	0.998391
GSE22886_NAIVE_CD4_TCELL_VS_12H_ACT_TH1_DN	0.00019998	0.00286483	1.40329	1.34129
REACTOME_G1_S_TRANSITION	0.00019998	0.00286483	1.45303	0.689591
LINDGREN_BLADDER_CANCER_CLUSTER_1_DN	0.00029997	0.00399219	1.38687	1.10955
GSE12366_GC_BCELL_VS_PLASMA_CELL_UP	9.999e-05	0.00160879	1.4954	0.911028
PUJANA_BRCA1_PCC_NETWORK	9.999e-05	0.00160879	2.72102	0.444042
GSE39820_CTRL_VS_TGFBETA1_IL6_CD4_TCELL_UP	0.00519948	0.0330681	1.06375	1.09686
GSE15930_NAIVE_VS_48H_IN_VITRO_STIM_IFNAB_CD8_TCELL_DN	9.999e-05	0.00160879	1.87412	0.994924
GRAHAM_CML_QUIESCENT_VS_NORMAL_QUIESCENT_UP	9.999e-05	0.00160879	1.58539	1.19294
RPS14_DN.V1_DN	9.999e-05	0.00160879	1.66918	0.726183
NUCLEAR_PART	9.999e-05	0.00160879	1.49296	0.481346
LABBE_WNT3A_TARGETS_UP	9.999e-05	0.00160879	1.37017	1.10955
ZHANG_RESPONSE_TO_CANTHARIDIN_DN	0.00169983	0.014928	1.16425	0.935848
KAAB_FAILED_HEART_ATRIUM_DN	0.00319968	0.0233848	1.10888	1.66241
GSE3982_DC_VS_TH1_DN	0.00249975	0.0201099	1.17228	1.09634
MICROTUBULE_ASSOCIATED_COMPLEX	0.00029997	0.00399219	1.27508	1.76209
GSE17974_CTRL_VS_ACT_IL4_AND_ANTI_IL12_72H_CD4_TCELL_DN	0.00219978	0.0180332	1.19206	0.524781
JOHANSSON_GLIOMAGENESIS_BY_PDGFB_UP	0.00439956	0.0301125	1.09067	2.71886
RESPONSE_TO_ENDOGENOUS_STIMULUS	0.00049995	0.00600497	1.32208	0.67083
GSE17974_CTRL_VS_ACT_IL4_AND_ANTI_IL12_1H_CD4_TCELL_DN	0.00519948	0.0330681	1.06849	0.611591
PETROVA_PROX1_TARGETS_UP	9.999e-05	0.00160879	1.39603	1.19294
JAEGER_METASTASIS_UP	9.999e-05	0.00160879	1.20733	2.95664
GSE3982_MAST_CELL_VS_TH1_DN	9.999e-05	0.00160879	1.40388	0.935848
BOYAULT_LIVER_CANCER_SUBCLASS_G23_UP	0.00059994	0.00671933	1.28097	1.37755
SPINDLE_MICROTUBULE	0.00449955	0.0305544	1.08246	1.3837
BENPORATH_PROLIFERATION	9.999e-05	0.00160879	2.07394	0.835708
GSE36476_CTRL_VS_TSST_ACT_40H_MEMORY_CD4_TCELL_YOUNG_DN	9.999e-05	0.00160879	2.30153	0.995251
DODD_NASOPHARYNGEAL_CARCINOMA_DN	9.999e-05	0.00160879	2.90648	0.449008
REACTOME_REGULATION_OF_GLUCOKINASE_BY_GLUCOKINASE_REGULATORY_PROTEIN	0.00059994	0.00671933	1.21683	1.45918
NADERI_BREAST_CANCER_PROGNOSIS_UP	0.00049995	0.00600497	1.26766	1.39933
GSE30962_ACUTE_VS_CHRONIC_LCMV_PRIMARY_INF_CD8_TCELL_DN	9.999e-05	0.00160879	1.73619	1.05463
ORGANELLE_ORGANIZATION_AND_BIOGENESIS	9.999e-05	0.00160879	2.11247	0.83409
CHROMOSOMEPERICENTRIC_REGION	0.00069993	0.00747054	1.21356	1.37755
TONKS_TARGETS_OF_RUNX1_RUNX1T1_FUSION_MONOCYTE_UP	0.00519948	0.0330681	1.08267	1.53797
GSE22886_IGG_IGA_MEMORY_BCELL_VS_BLOOD_PLASMA_CELL_DN	0.00459954	0.0308929	1.08336	1.35879
GSE3982_DC_VS_MAC_DN	0.00079992	0.00837198	1.21584	0.718829
CELL_CYCLE_PHASE	9.999e-05	0.00160879	1.70518	0.998391
REACTOME_BASE_EXCISION_REPAIR	0.00829917	0.0469017	1.02151	0.707415
YU_MYC_TARGETS_UP	0.00019998	0.00286483	1.39792	2.71886
DANG_MYC_TARGETS_UP	0.00129987	0.0121584	1.20482	1.19294
GSE29614_CTRL_VS_TIV_FLU_VACCINE_PBMC_2007_DN	0.00019998	0.00286483	1.39245	1.06419
ZHAN_MULTIPLE_MYELOMA_SUBGROUPS	0.0009999	0.00993449	1.20123	0.995251
SCIAN_CELL_CYCLE_TARGETS_OF_TP53_AND_TP73_DN	0.00339966	0.024555	1.07724	1.46275
GAL_LEUKEMIC_STEM_CELL_DN	9.999e-05	0.00160879	1.43989	0.998391
RODRIGUES_THYROID_CARCINOMA_ANAPLASTIC_UP	9.999e-05	0.00160879	2.00602	0.944894
CROSBY_E2F4_TARGETS	0.00479952	0.0316445	1.06386	1.37755
GRADE_COLON_CANCER_UP	0.00019998	0.00286483	1.3688	0.446534
GSE14769_20MIN_VS_360MIN_LPS_BMDM_UP	0.00049995	0.00600497	1.40816	0.718829
E2F3_UP.V1_UP	0.0009999	0.00993449	1.22267	0.791513
KINASE_BINDING	0.00519948	0.0330681	1.05902	0.774681
GSE1432_6H_VS_24H_IFNG_MICROGLIA_UP	0.00179982	0.0154907	1.17425	1.13999
GSE19825_NAIVE_VS_DAY3_EFF_CD8_TCELL_DN	0.00089991	0.00913038	1.20943	1.0956
MORI_LARGE_PRE_BII_LYMPHOCYTE_UP	9.999e-05	0.00160879	1.84873	0.99884
REACTOME_LATE_PHASE_OF_HIV_LIFE_CYCLE	0.00049995	0.00600497	1.3103	1.34129
DUTERTRE_ESTRADIOL_RESPONSE_24HR_UP	9.999e-05	0.00160879	3.32078	0.995251
GSE10239_MEMORY_VS_KLRG1INT_EFF_CD8_TCELL_DN	0.00069993	0.00747054	1.27616	0.688345
REACTOME_M_G1_TRANSITION	0.00169983	0.014928	1.17786	0.689591
STEIN_ESR1_TARGETS	9.999e-05	0.00160879	1.37771	1.38241
PUJANA_BRCA_CENTERED_NETWORK	0.00019998	0.00286483	1.44617	0.474466
ROESSLER_LIVER_CANCER_METASTASIS_UP	0.00539946	0.0341887	1.06757	1.45918
VERNELL_RETINOBLASTOMA_PATHWAY_UP	9.999e-05	0.00160879	1.84039	0.995251
MORI_IMMATURE_B_LYMPHOCYTE_DN	9.999e-05	0.00160879	2.33085	1.41865
GSE22045_TREG_VS_TCONV_UP	9.999e-05	0.00160879	1.39107	0.716517
GSE17974_0H_VS_48H_IN_VITRO_ACT_CD4_TCELL_DN	9.999e-05	0.00160879	1.45048	0.548093
REACTOME_E2F_MEDIATED_REGULATION_OF_DNA_REPLICATION	9.999e-05	0.00160879	1.41165	1.26774
DNA_METABOLIC_PROCESS	0.00019998	0.00286483	1.3024	0.67083
GSE15930_NAIVE_VS_48H_IN_VITRO_STIM_IL12_CD8_TCELL_DN	9.999e-05	0.00160879	1.75999	0.710105
MORI_EMU_MYC_LYMPHOMA_BY_ONSET_TIME_UP	0.00049995	0.00600497	1.28735	1.0344
GSE17974_2.5H_VS_72H_IL4_AND_ANTI_IL12_ACT_CD4_TCELL_DN	0.00779922	0.0447806	1.03851	0.685865
GSE7460_FOXP3_MUT_VS_HET_ACT_TCONV_DN	0.00319968	0.0233848	1.13864	0.705837
BENPORATH_ES_CORE_NINE_CORRELATED	0.00219978	0.0180332	1.17302	0.882171
PID_BARD1PATHWAY	0.00649935	0.0391413	1.0359	1.28162
ZHANG_TLX_TARGETS_36HR_DN	9.999e-05	0.00160879	2.13286	1.18155
ORGANELLE_LUMEN	9.999e-05	0.00160879	1.58805	0.965866
PID_PLK1_PATHWAY	0.00059994	0.00671933	1.22776	1.37755
SMID_BREAST_CANCER_BASAL_UP	9.999e-05	0.00160879	1.92658	0.995251
TIEN_INTESTINE_PROBIOTICS_24HR_UP	9.999e-05	0.00160879	1.97381	0.800279
HORIUCHI_WTAP_TARGETS_DN	9.999e-05	0.00160879	2.34415	0.895985
REACTOME_G2_M_CHECKPOINTS	9.999e-05	0.00160879	1.35967	1.26774
GROSS_HYPOXIA_VIA_ELK3_AND_HIF1A_DN	0.00319968	0.0233848	1.11526	1.10955
GSE24026_PD1_LIGATION_VS_CTRL_IN_ACT_TCELL_LINE_DN	9.999e-05	0.00160879	1.3867	0.935848
GSE13411_NAIVE_VS_MEMORY_BCELL_DN	0.00519948	0.0330681	1.0712	1.62731
GSE1460_DP_THYMOCYTE_VS_NAIVE_CD4_TCELL_CORD_BLOOD_UP	0.0029997	0.0224561	1.13451	0.430102
GSE22886_NAIVE_CD4_TCELL_VS_NKCELL_DN	0.00069993	0.00747054	1.29884	1.18155
GSE34205_HEALTHY_VS_FLU_INF_INFANT_PBMC_DN	0.00419958	0.0291135	1.07611	0.755783
MOOTHA_HUMAN_MITODB_6_2002	9.999e-05	0.00160879	1.81408	0.618518
PID_E2F_PATHWAY	9.999e-05	0.00160879	1.39775	1.19294
LEE_BMP2_TARGETS_DN	9.999e-05	0.00160879	2.11033	0.903046
CASORELLI_ACUTE_PROMYELOCYTIC_LEUKEMIA_DN	9.999e-05	0.00160879	2.2637	0.882171
REACTOME_POL_SWITCHING	0.00729927	0.0427062	1.03082	1.18155
RHODES_UNDIFFERENTIATED_CANCER	9.999e-05	0.00160879	1.87704	1.10955
CREIGHTON_ENDOCRINE_THERAPY_RESISTANCE_1	0.00359964	0.0257407	1.09859	1.26759
GSE27786_LSK_VS_CD4_TCELL_UP	0.00779922	0.0447806	1.04126	0.821782
GSE10239_NAIVE_VS_KLRG1HIGH_EFF_CD8_TCELL_DN	0.00019998	0.00286483	1.47113	1.05463
PUJANA_BREAST_CANCER_WITH_BRCA1_MUTATED_UP	0.00019998	0.00286483	1.36718	1.28162
REACTOME_S_PHASE	9.999e-05	0.00160879	1.43032	1.18155
ACEVEDO_LIVER_TUMOR_VS_NORMAL_ADJACENT_TISSUE_UP	9.999e-05	0.00160879	1.47906	0.689591
WHITFIELD_CELL_CYCLE_LITERATURE	9.999e-05	0.00160879	1.63158	1.37755
REACTOME_METABOLISM_OF_CARBOHYDRATES	0.00509949	0.0329177	1.08098	0.652262
BENPORATH_ES_1	9.999e-05	0.00160879	1.82214	0.995251
BENPORATH_ES_2	0.00049995	0.00600497	1.29641	1.26774
MUELLER_PLURINET	9.999e-05	0.00160879	1.5913	0.995251
FERRANDO_T_ALL_WITH_MLL_ENL_FUSION_DN	0.00179982	0.0154907	1.19533	0.995251
CELL_CYCLE_CHECKPOINT_GO_0000075	0.00349965	0.0251508	1.11212	0.8046
BURTON_ADIPOGENESIS_PEAK_AT_24HR	9.999e-05	0.00160879	1.48273	0.998391
GSE3982_MEMORY_CD4_TCELL_VS_TH2_DN	9.999e-05	0.00160879	1.94483	1.34129
KRIGE_RESPONSE_TO_TOSEDOSTAT_24HR_DN	9.999e-05	0.00160879	1.7177	0.481215
GSE3982_EOSINOPHIL_VS_MAC_DN	0.00559944	0.0350942	1.05857	0.618518
GSE30962_ACUTE_VS_CHRONIC_LCMV_SECONDARY_INF_CD8_TCELL_DN	9.999e-05	0.00160879	1.56081	1.01658
KALMA_E2F1_TARGETS	0.00059994	0.00671933	1.26236	1.5648
GSE24142_ADULT_VS_FETAL_EARLY_THYMIC_PROGENITOR_DN	0.00789921	0.0451743	1.03854	0.903046
DNA_REPAIR	0.00179982	0.0154907	1.14792	0.67083
ZHENG_GLIOBLASTOMA_PLASTICITY_UP	9.999e-05	0.00160879	1.81668	1.19294
GARGALOVIC_RESPONSE_TO_OXIDIZED_PHOSPHOLIPIDS_TURQUOISE_DN	0.00029997	0.00399219	1.34091	0.998391
RHODES_CANCER_META_SIGNATURE	0.00549945	0.0347707	1.06942	1.10955
CHICAS_RB1_TARGETS_LOW_SERUM	0.00229977	0.0186402	1.15065	1.01658
ZHANG_TLX_TARGETS_UP	9.999e-05	0.00160879	2.07549	1.38241
GSE17721_CTRL_VS_GARDIQUIMOD_24H_BMDM_DN	0.00069993	0.00747054	1.19709	0.508395
BOYAULT_LIVER_CANCER_SUBCLASS_G3_UP	9.999e-05	0.00160879	1.87125	1.39803
TURASHVILI_BREAST_DUCTAL_CARCINOMA_VS_LOBULAR_NORMAL_UP	0.00059994	0.00671933	1.27238	1.40383
GSE24634_TEFF_VS_TCONV_DAY10_IN_CULTURE_UP	9.999e-05	0.00160879	1.51069	0.998391
SISTER_CHROMATID_SEGREGATION	0.00259974	0.0204937	1.11541	0.998391
CYTOPLASMIC_PART	0.00029997	0.00399219	1.4273	0.868895
WEST_ADRENOCORTICAL_TUMOR_UP	9.999e-05	0.00160879	1.52344	0.562723
ISHIDA_E2F_TARGETS	9.999e-05	0.00160879	2.01331	0.99884
BIDUS_METASTASIS_UP	9.999e-05	0.00160879	1.60042	1.5648
AFFAR_YY1_TARGETS_DN	9.999e-05	0.00160879	2.03545	1.19294
GSE30962_PRIMARY_VS_SECONDARY_ACUTE_LCMV_INF_CD8_TCELL_UP	9.999e-05	0.00160879	2.74657	0.998391
ZHAN_MULTIPLE_MYELOMA_PR_UP	9.999e-05	0.00160879	1.78364	1.10955
LY_AGING_OLD_DN	0.00409959	0.0286043	1.09989	0.689591
MOOTHA_MITOCHONDRIA	0.00029997	0.00399219	1.34961	0.618518
LE_EGR2_TARGETS_UP	9.999e-05	0.00160879	1.55266	1.10955
BURTON_ADIPOGENESIS_3	9.999e-05	0.00160879	2.15438	0.99884
REACTOME_CHROMOSOME_MAINTENANCE	9.999e-05	0.00160879	1.64644	1.01004
MCBRYAN_PUBERTAL_BREAST_6_7WK_DN	0.00059994	0.00671933	1.25471	3.33925
GSE24634_TREG_VS_TCONV_POST_DAY3_IL4_CONVERSION_UP	9.999e-05	0.00160879	1.95011	1.24417
YEGNASUBRAMANIAN_PROSTATE_CANCER	0.00109989	0.0106339	1.23745	1.58968
CHROMATIN_MODIFICATION	0.00169983	0.014928	1.13781	0.903969
GSE3982_NKCELL_VS_TH1_DN	9.999e-05	0.00160879	1.77774	0.998391
MOREAUX_B_LYMPHOCYTE_MATURATION_BY_TACI_DN	9.999e-05	0.00160879	1.67413	1.01658
REACTOME_TRANSPORT_OF_RIBONUCLEOPROTEINS_INTO_THE_HOST_NUCLEUS	0.00059994	0.00671933	1.21683	1.45918
GARY_CD5_TARGETS_DN	0.00149985	0.0135869	1.25953	0.816977
KINESIN_COMPLEX	0.00149985	0.0135869	1.11613	1.76209
SHEPARD_BMYB_TARGETS	9.999e-05	0.00160879	1.36104	1.05463
GSE22886_NEUTROPHIL_VS_DC_DN	0.00209979	0.0174121	1.15517	0.959223
GSE10239_MEMORY_VS_KLRG1HIGH_EFF_CD8_TCELL_DN	0.00469953	0.0312722	1.08633	0.460912
KEGG_CELL_CYCLE	0.00089991	0.00913038	1.32184	0.663842
GSE3982_CENT_MEMORY_CD4_TCELL_VS_TH2_DN	0.00019998	0.00286483	1.37039	1.5648
SHEPARD_BMYB_MORPHOLINO_DN	9.999e-05	0.00160879	1.42377	1.05463
HAMAI_APOPTOSIS_VIA_TRAIL_UP	0.00019998	0.00286483	1.57813	0.998391
PUJANA_XPRSS_INT_NETWORK	9.999e-05	0.00160879	1.80517	0.995251
GAUSSMANN_MLL_AF4_FUSION_TARGETS_A_UP	0.00139986	0.0128704	1.17835	1.45234
EGUCHI_CELL_CYCLE_RB1_TARGETS	0.00109989	0.0106339	1.20917	1.38241
CHROMATIN_REMODELING	0.00129987	0.0121584	1.12908	1.85987
GSE3982_EOSINOPHIL_VS_TH2_DN	9.999e-05	0.00160879	1.46237	0.685865
GSE15930_NAIVE_VS_24H_IN_VITRO_STIM_CD8_TCELL_DN	9.999e-05	0.00160879	1.52654	0.562723
GSE9650_EFFECTOR_VS_MEMORY_CD8_TCELL_UP	0.00039996	0.00502807	1.26732	0.451261
BASAKI_YBX1_TARGETS_UP	9.999e-05	0.00160879	2.42047	0.857569
GSE24634_NAIVE_CD4_TCELL_VS_DAY7_IL4_CONV_TREG_DN	9.999e-05	0.00160879	1.65535	0.569605
NAKAYAMA_SOFT_TISSUE_TUMORS_PCA2_UP	9.999e-05	0.00160879	1.69882	0.998391
CHANG_CYCLING_GENES	9.999e-05	0.00160879	2.45659	1.37755
REACTOME_ACTIVATION_OF_THE_PRE_REPLICATIVE_COMPLEX	0.00269973	0.0208999	1.10597	0.710105
MAHAJAN_RESPONSE_TO_IL1A_DN	0.00269973	0.0208999	1.1157	0.652262
MOREAUX_MULTIPLE_MYELOMA_BY_TACI_DN	9.999e-05	0.00160879	2.02126	1.01004
GSE1460_NAIVE_CD4_TCELL_CORD_BLOOD_VS_THYMIC_STROMAL_CELL_DN	0.00069993	0.00747054	1.26841	0.663842
MITOCHONDRIAL_ENVELOPE	0.00729927	0.0427062	1.02767	1.03809
EXOPEPTIDASE_ACTIVITY	0.0019998	0.016744	1.1026	1.52431
GSE22886_UNSTIM_VS_STIM_MEMORY_TCELL_DN	0.00479952	0.0316445	1.08865	0.505285
GSE15930_NAIVE_VS_72H_IN_VITRO_STIM_CD8_TCELL_DN	9.999e-05	0.00160879	1.55006	1.43262
QI_PLASMACYTOMA_DN	0.00259974	0.0204937	1.1396	1.31482
GRAHAM_CML_DIVIDING_VS_NORMAL_QUIESCENT_UP	9.999e-05	0.00160879	2.45301	0.903046
REACTOME_LAGGING_STRAND_SYNTHESIS	0.00039996	0.00502807	1.27636	1.18155
SLEBOS_HEAD_AND_NECK_CANCER_WITH_HPV_UP	9.999e-05	0.00160879	1.4731	0.710105
E2F1_UP.V1_UP	0.00679932	0.0405514	1.0455	0.520292
WU_APOPTOSIS_BY_CDKN1A_VIA_TP53	9.999e-05	0.00160879	1.60922	1.38241
PID_AURORA_B_PATHWAY	9.999e-05	0.00160879	1.4268	1.96332
SPIELMAN_LYMPHOBLAST_EUROPEAN_VS_ASIAN_DN	0.00159984	0.0142237	1.19259	0.828618
GSE17974_CTRL_VS_ACT_IL4_AND_ANTI_IL12_4H_CD4_TCELL_DN	0.00359964	0.0257407	1.12043	0.550809
SHEDDEN_LUNG_CANCER_POOR_SURVIVAL_A6	9.999e-05	0.00160879	3.06933	0.903969
BILD_E2F3_ONCOGENIC_SIGNATURE	0.00129987	0.0121584	1.1637	0.652262
M_PHASE_OF_MITOTIC_CELL_CYCLE	9.999e-05	0.00160879	1.4993	0.998391
REACTOME_DNA_STRAND_ELONGATION	9.999e-05	0.00160879	1.50551	1.18155
REACTOME_MEIOSIS	0.00559944	0.0350942	1.03442	1.28162
GSE24634_TREG_VS_TCONV_POST_DAY5_IL4_CONVERSION_UP	0.00049995	0.00600497	1.32593	0.903969
TANAKA_METHYLATED_IN_ESOPHAGEAL_CARCINOMA	0.00319968	0.0233848	1.09536	1.47584
GSE24634_TEFF_VS_TCONV_DAY3_IN_CULTURE_UP	9.999e-05	0.00160879	1.72992	0.998391
KIM_WT1_TARGETS_DN	9.999e-05	0.00160879	1.63468	0.998391
INTRACELLULAR_ORGANELLE_PART	9.999e-05	0.00160879	2.39664	0.868895
PETROVA_ENDOTHELIUM_LYMPHATIC_VS_BLOOD_UP	9.999e-05	0.00160879	1.39603	1.19294
WHITFIELD_CELL_CYCLE_G1_S	0.00029997	0.00399219	1.35685	0.995251
PENG_GLUTAMINE_DEPRIVATION_DN	9.999e-05	0.00160879	1.47284	0.481346
FURUKAWA_DUSP6_TARGETS_PCI35_DN	9.999e-05	0.00160879	1.55761	0.903046
GSE22886_UNSTIM_VS_IL2_STIM_NKCELL_DN	9.999e-05	0.00160879	1.55298	0.903046
GSE3982_BCELL_VS_TH2_DN	0.00259974	0.0204937	1.12818	0.99884
KEGG_HOMOLOGOUS_RECOMBINATION	0.00429957	0.0297111	1.09519	1.18155
KRIGE_RESPONSE_TO_TOSEDOSTAT_6HR_DN	0.00039996	0.00502807	1.36185	0.481215
MOHANKUMAR_TLX1_TARGETS_UP	9.999e-05	0.00160879	1.55878	0.882171
CHICAS_RB1_TARGETS_GROWING	9.999e-05	0.00160879	1.67792	1.37755
GSE13411_PLASMA_CELL_VS_MEMORY_BCELL_UP	0.00189981	0.0162217	1.20071	1.19294
REACTOME_HIV_LIFE_CYCLE	0.00329967	0.0239532	1.13732	1.34129
WHITFIELD_CELL_CYCLE_G2_M	0.00069993	0.00747054	1.23413	1.05463
POMEROY_MEDULLOBLASTOMA_PROGNOSIS_DN	0.00179982	0.0154907	1.14564	0.935848
INTRACELLULAR_NON_MEMBRANE_BOUND_ORGANELLE	9.999e-05	0.00160879	1.68106	1.37755
CROONQUIST_NRAS_VS_STROMAL_STIMULATION_DN	0.00029997	0.00399219	1.31953	1.19294
GCNP_SHH_UP_LATE.V1_UP	0.0029997	0.0224561	1.13433	1.19294
MARSON_BOUND_BY_E2F4_UNSTIMULATED	9.999e-05	0.00160879	3.15508	0.998391
BERENJENO_TRANSFORMED_BY_RHOA_UP	9.999e-05	0.00160879	2.62036	0.998391
WANG_METASTASIS_OF_BREAST_CANCER_ESR1_UP	0.00329967	0.0239532	1.11889	1.10955
NUCLEAR_PORE	0.0039996	0.0280427	1.08374	0.998391
GSE24634_TEFF_VS_TCONV_DAY5_IN_CULTURE_UP	9.999e-05	0.00160879	1.74964	0.932434
CHROMOSOME_ORGANIZATION_AND_BIOGENESIS	9.999e-05	0.00160879	1.87097	0.903969
BIOCARTA_ATRBRCA_PATHWAY	0.00649935	0.0391413	1.02415	1.28162
GSE17974_0H_VS_72H_IN_VITRO_ACT_CD4_TCELL_DN	0.00129987	0.0121584	1.19159	0.514974
PROTEIN_COMPLEX	9.999e-05	0.00160879	1.84958	0.903969
GSE15930_NAIVE_VS_72H_IN_VITRO_STIM_IFNAB_CD8_TCELL_DN	9.999e-05	0.00160879	1.59175	1.43262
EGFR_UP.V1_DN	0.00229977	0.0186402	1.19065	0.790432
GSE3982_EFF_MEMORY_CD4_TCELL_VS_TH1_DN	0.00019998	0.00286483	1.30681	0.717404
YAO_TEMPORAL_RESPONSE_TO_PROGESTERONE_CLUSTER_13	0.00089991	0.00913038	1.26251	1.06419
YAO_TEMPORAL_RESPONSE_TO_PROGESTERONE_CLUSTER_14	0.00129987	0.0121584	1.18237	0.53606
YAO_TEMPORAL_RESPONSE_TO_PROGESTERONE_CLUSTER_15	0.00519948	0.0330681	1.06275	3.76061
GSE14308_TH1_VS_TH17_UP	0.0019998	0.016744	1.13155	0.474466
REACTOME_HOMOLOGOUS_RECOMBINATION_REPAIR_OF_REPLICATION_INDEPENDENT_DOUBLE_STRAND_BREAKS	0.00259974	0.0204937	1.12477	1.04188
GARCIA_TARGETS_OF_FLI1_AND_DAX1_DN	9.999e-05	0.00160879	1.61833	1.39933
RAY_TUMORIGENESIS_BY_ERBB2_CDC25A_UP	0.00069993	0.00747054	1.20096	3.27398
THILLAINADESAN_ZNF217_TARGETS_UP	0.00409959	0.0286043	1.08818	1.63659
PEDERSEN_METASTASIS_BY_ERBB2_ISOFORM_7	0.00889911	0.0496416	1.00996	1.38241
BORLAK_LIVER_CANCER_EGF_UP	0.00779922	0.0447806	1.02963	2.95664
FUJII_YBX1_TARGETS_DN	9.999e-05	0.00160879	2.46231	0.959223
TARTE_PLASMA_CELL_VS_PLASMABLAST_DN	9.999e-05	0.00160879	1.82085	0.781669
GSE7460_CTRL_VS_TGFB_TREATED_ACT_TREG_UP	9.999e-05	0.00160879	1.63358	0.903046
GSE1460_DP_THYMOCYTE_VS_NAIVE_CD4_TCELL_ADULT_BLOOD_UP	9.999e-05	0.00160879	1.70277	1.63857
PORE_COMPLEX	0.0039996	0.0280427	1.08374	0.998391
GRAHAM_NORMAL_QUIESCENT_VS_NORMAL_DIVIDING_DN	9.999e-05	0.00160879	2.46272	1.19294
SCHLOSSER_MYC_TARGETS_REPRESSED_BY_SERUM	0.00019998	0.00286483	1.48674	0.48678
GSE24634_TREG_VS_TCONV_POST_DAY7_IL4_CONVERSION_UP	9.999e-05	0.00160879	2.22842	1.19294
HOFFMANN_LARGE_TO_SMALL_PRE_BII_LYMPHOCYTE_UP	9.999e-05	0.00160879	2.36362	1.71609
GSE29614_CTRL_VS_DAY7_TIV_FLU_VACCINE_PBMC_DN	9.999e-05	0.00160879	2.06796	1.35879
DUTERTRE_ESTRADIOL_RESPONSE_6HR_UP	9.999e-05	0.00160879	1.58169	0.995251
NUCLEOPLASM	0.00119988	0.011472	1.24088	0.995251
PEPTIDASE_ACTIVITY	0.00759924	0.0441616	1.04553	1.41173
NUCLEAR_MEMBRANE_PART	0.0039996	0.0280427	1.08374	0.998391
GSE20366_EX_VIVO_VS_HOMEOSTATIC_CONVERSION_TREG_DN	9.999e-05	0.00160879	1.61486	0.821782
GSE24634_TEFF_VS_TCONV_DAY7_IN_CULTURE_UP	9.999e-05	0.00160879	2.43748	1.38241
GSE10239_NAIVE_VS_DAY4.5_EFF_CD8_TCELL_DN	9.999e-05	0.00160879	1.30622	0.835708
GAVIN_FOXP3_TARGETS_CLUSTER_P2	0.00519948	0.0330681	1.07072	0.979769
GAVIN_FOXP3_TARGETS_CLUSTER_P6	9.999e-05	0.00160879	1.5855	0.994924
GSE7460_CTRL_VS_TGFB_TREATED_ACT_CD8_TCELL_UP	0.00159984	0.0142237	1.18907	1.76209
DIAZ_CHRONIC_MEYLOGENOUS_LEUKEMIA_UP	9.999e-05	0.00160879	1.60647	0.903969
FOURNIER_ACINAR_DEVELOPMENT_LATE_DN	0.00529947	0.0336049	1.06795	1.71609
CAIRO_HEPATOBLASTOMA_CLASSES_UP	9.999e-05	0.00160879	2.47372	0.564966
GSE3982_MAC_VS_TH1_DN	9.999e-05	0.00160879	1.38699	0.776322
GSE20366_EX_VIVO_VS_DEC205_CONVERSION_NAIVE_CD4_TCELL_UP	0.00069993	0.00747054	1.29103	1.47979
REACTOME_TELOMERE_MAINTENANCE	0.00029997	0.00399219	1.29377	1.01004
MYC_UP.V1_UP	0.00229977	0.0186402	1.16066	0.717404
GROSS_HYPOXIA_VIA_ELK3_UP	0.0019998	0.016744	1.20718	1.82797
REACTOME_DNA_REPLICATION	9.999e-05	0.00160879	2.19911	1.18155
GRAESSMANN_APOPTOSIS_BY_DOXORUBICIN_DN	9.999e-05	0.00160879	1.697	0.781669
GEORGES_TARGETS_OF_MIR192_AND_MIR215	9.999e-05	0.00160879	1.48356	0.574322
GEORGES_CELL_CYCLE_MIR192_TARGETS	0.00089991	0.00913038	1.22259	1.98505
RODRIGUES_THYROID_CARCINOMA_POORLY_DIFFERENTIATED_UP	9.999e-05	0.00160879	2.37536	1.01658
REACTOME_REPAIR_SYNTHESIS_FOR_GAP_FILLING_BY_DNA_POL_IN_TC_NER	0.00109989	0.0106339	1.16418	1.18155
BOHN_PRIMARY_IMMUNODEFICIENCY_SYNDROM_UP	0.00019998	0.00286483	1.30849	2.10477
SMID_BREAST_CANCER_LUMINAL_A_DN	0.00109989	0.0106339	1.21746	1.39933
CHIARETTI_ACUTE_LYMPHOBLASTIC_LEUKEMIA_ZAP70	0.00049995	0.00600497	-1.26289	-1.26917
SATO_SILENCED_BY_METHYLATION_IN_PANCREATIC_CANCER_1	0.00209979	0.0174121	-1.14094	-0.908848
LIEN_BREAST_CARCINOMA_METAPLASTIC_VS_DUCTAL_DN	0.00489951	0.0320587	-1.0664	-3.33925
ZWANG_CLASS_3_TRANSIENTLY_INDUCED_BY_EGF	0.00109989	0.0106339	-1.24447	-0.576254
SMID_BREAST_CANCER_NORMAL_LIKE_UP	9.999e-05	0.00160879	-1.55265	-1.49423
ZHAN_LATE_DIFFERENTIATION_GENES_DN	0.00479952	0.0316445	-1.05754	-1.15714
GSE9037_CTRL_VS_LPS_1H_STIM_BMDM_DN	0.00669933	0.0400659	-1.03855	-1.31365
CUI_TCF21_TARGETS_2_DN	0.00259974	0.0204937	-1.12591	-0.903367
LEE_NEURAL_CREST_STEM_CELL_UP	0.00029997	0.00399219	-1.21415	-2.20066
GSE29618_BCELL_VS_MDC_UP	0.00089991	0.00913038	-1.25235	-1.2285
MIKKELSEN_NPC_HCP_WITH_H3K4ME3_AND_H3K27ME3	0.00029997	0.00399219	-1.32884	-0.967885
BOYLAN_MULTIPLE_MYELOMA_D_DN	0.00089991	0.00913038	-1.23662	-1.03728
RUTELLA_RESPONSE_TO_HGF_VS_CSF2RB_AND_IL4_UP	0.0059994	0.0369563	-1.06001	-1.41667
GSE7852_LN_VS_FAT_TCONV_DN	0.00779922	0.0447806	-1.02643	-1.15714
GSE30083_SP1_VS_SP4_THYMOCYTE_DN	0.00209979	0.0174121	-1.14659	-0.7277
BENPORATH_ES_WITH_H3K27ME3	0.00289971	0.0220521	-1.11908	-0.676545
WIELAND_UP_BY_HBV_INFECTION	0.00789921	0.0451743	-1.02452	-1.5434
GSE36392_TYPE_2_MYELOID_VS_NEUTROPHIL_IL25_TREATED_LUNG_UP	0.0049995	0.0325156	-1.08404	-1.09805
GSE22886_NAIVE_BCELL_VS_NEUTROPHIL_UP	0.00049995	0.00600497	-1.28767	-1.2285
TONKS_TARGETS_OF_RUNX1_RUNX1T1_FUSION_HSC_DN	0.00149985	0.0135869	-1.18588	-0.866032
GSE24634_TREG_VS_TCONV_POST_DAY7_IL4_CONVERSION_DN	0.0029997	0.0224561	-1.11626	-0.834316
GSE13484_3H_UNSTIM_VS_YF17D_VACCINE_STIM_PBMC_DN	0.00509949	0.0329177	-1.07199	-1.09204
GSE1460_INTRATHYMIC_T_PROGENITOR_VS_NAIVE_CD4_TCELL_CORD_BLOOD_DN	0.00079992	0.00837198	-1.2803	-0.642863
GSE1460_INTRATHYMIC_T_PROGENITOR_VS_CD4_THYMOCYTE_DN	0.00269973	0.0208999	-1.16974	-1.5434
GSE17721_CTRL_VS_CPG_4H_BMDM_DN	0.00459954	0.0308929	-1.08357	-1.26917
TING_SILENCED_BY_DICER	9.999e-05	0.00160879	-1.32357	-1.74892
GSE24634_IL4_VS_CTRL_TREATED_NAIVE_CD4_TCELL_DAY3_DN	0.00329967	0.0239532	-1.1287	-1.06509
GSE2706_UNSTIM_VS_8H_R848_DC_DN	0.00309969	0.0229654	-1.12581	-1.63126
CHIANG_LIVER_CANCER_SUBCLASS_CTNNB1_DN	0.0059994	0.0369563	-1.05832	-1.67126
GSE22886_NAIVE_TCELL_VS_MONOCYTE_DN	0.00059994	0.00671933	-1.27008	-1.06509
GSE17974_0H_VS_24H_IN_VITRO_ACT_CD4_TCELL_UP	0.00279972	0.021443	-1.12646	-0.910791
BOYAULT_LIVER_CANCER_SUBCLASS_G6_DN	9.999e-05	0.00160879	-1.21946	-2.20066
FLECHNER_BIOPSY_KIDNEY_TRANSPLANT_REJECTED_VS_OK_UP	0.00489951	0.0320587	-1.07289	-1.26774
LENAOUR_DENDRITIC_CELL_MATURATION_UP	0.00839916	0.0474047	-1.02356	-2.58722
GSE36476_CTRL_VS_TSST_ACT_72H_MEMORY_CD4_TCELL_OLD_UP	0.00389961	0.027611	-1.08187	-0.652262
GSE24634_NAIVE_CD4_TCELL_VS_DAY5_IL4_CONV_TREG_UP	0.00449955	0.0305544	-1.09104	-0.834316
GSE10325_LUPUS_CD4_TCELL_VS_LUPUS_MYELOID_DN	0.00289971	0.0220521	-1.11631	-1.06509
HOFFMANN_LARGE_TO_SMALL_PRE_BII_LYMPHOCYTE_DN	0.00289971	0.0220521	-1.08558	-1.28162
GARGALOVIC_RESPONSE_TO_OXIDIZED_PHOSPHOLIPIDS_BLACK_UP	0.00669933	0.0400659	-1.04137	-0.800279
GSE15750_DAY6_VS_DAY10_TRAF6KO_EFF_CD8_TCELL_DN	0.00589941	0.0364445	-1.06334	-1.19717
GSE22886_NAIVE_TCELL_VS_NKCELL_UP	0.00149985	0.0135869	-1.19749	-0.742937
GROSS_HYPOXIA_VIA_ELK3_DN	0.00589941	0.0364445	-1.06273	-0.695422
GSE29618_BCELL_VS_MDC_DAY7_FLU_VACCINE_UP	9.999e-05	0.00160879	-1.53738	-1.2285
REACTOME_SIGNALING_BY_RHO_GTPASES	0.00159984	0.0142237	-1.14888	-0.548093
GSE10325_LUPUS_CD4_TCELL_VS_LUPUS_BCELL_DN	0.0019998	0.016744	-1.17408	-1.49423
GSE30083_SP2_VS_SP4_THYMOCYTE_DN	0.00069993	0.00747054	-1.20533	-0.800404
GSE22886_NAIVE_BCELL_VS_DC_UP	0.00809919	0.0461344	-1.01598	-0.910791
RIGGI_EWING_SARCOMA_PROGENITOR_UP	0.00619938	0.0378101	-1.04696	-0.800404
TAKEDA_TARGETS_OF_NUP98_HOXA9_FUSION_10D_DN	0.00509949	0.0329177	-1.03983	-1.13441
TAKEDA_TARGETS_OF_NUP98_HOXA9_FUSION_8D_UP	0.00849915	0.0478438	-1.01675	-2.26768
BOYAULT_LIVER_CANCER_SUBCLASS_G1_UP	0.00879912	0.0494034	-1.01106	-0.444042
PEREZ_TP53_AND_TP63_TARGETS	0.00759924	0.0441616	-1.03101	-0.941649
PID_RAS_PATHWAY	0.0009999	0.00993449	-1.16082	-1.51755
GSE10325_LUPUS_CD4_TCELL_VS_LUPUS_MYELOID_UP	0.00139986	0.0128704	-1.22153	-0.834316
WONG_ADULT_TISSUE_STEM_MODULE	0.00029997	0.00399219	-1.31295	-0.680649
NAGASHIMA_NRG1_SIGNALING_UP	0.00019998	0.00286483	-1.38665	-1.18165
RUTELLA_RESPONSE_TO_HGF_VS_CSF2RB_AND_IL4_DN	0.00269973	0.0208999	-1.12606	-2.29376
GSE15750_DAY6_VS_DAY10_EFF_CD8_TCELL_DN	0.0009999	0.00993449	-1.26695	-0.885232
OSADA_ASCL1_TARGETS_UP	0.00059994	0.00671933	-1.17024	-1.80224
JOHNSTONE_PARVB_TARGETS_2_UP	0.00609939	0.0373588	-1.04752	-0.96695
GSE1460_INTRATHYMIC_T_PROGENITOR_VS_DP_THYMOCYTE_DN	0.00719928	0.042351	-1.02968	-1.18165
VANTVEER_BREAST_CANCER_ESR1_UP	0.00449955	0.0305544	-1.07527	-0.716517
GSE9988_LPS_VS_LPS_AND_ANTI_TREM1_MONOCYTE_UP	9.999e-05	0.00160879	-1.52043	-1.02002
MEL18_DN.V1_DN	0.00409959	0.0286043	-1.08857	-0.908848
GSE24142_EARLY_THYMIC_PROGENITOR_VS_DN3_THYMOCYTE_ADULT_UP	0.00319968	0.0233848	-1.11893	-1.29061
GSE22886_DAY1_VS_DAY7_MONOCYTE_IN_CULTURE_UP	9.999e-05	0.00160879	-1.76529	-1.26774
GSE10325_CD4_TCELL_VS_BCELL_DN	0.00689931	0.0409777	-1.04381	-1.49423
CROONQUIST_IL6_DEPRIVATION_UP	0.00119988	0.011472	-1.1515	-1.5434
WOO_LIVER_CANCER_RECURRENCE_UP	0.00069993	0.00747054	-1.16183	-1.63126
GSE12366_GC_VS_MEMORY_BCELL_DN	0.00639936	0.0388648	-1.04622	-0.834316
ERB2_UP.V1_UP	0.00059994	0.00671933	-1.24424	-1.40736
GSE6269_E_COLI_VS_STREP_AUREUS_INF_PBMC_DN	0.00269973	0.0208999	-1.12914	-1.03728
GSE24142_EARLY_THYMIC_PROGENITOR_VS_DN2_THYMOCYTE_ADULT_UP	0.0029997	0.0224561	-1.1151	-1.29061
PTEN_DN.V2_DN	0.00739926	0.0432325	-1.02884	-2.18079
GSE19825_NAIVE_VS_IL2RAHIGH_DAY3_EFF_CD8_TCELL_UP	0.00419958	0.0291135	-1.08614	-1.39803
GSE360_LOW_DOSE_B_MALAYI_VS_M_TUBERCULOSIS_DC_DN	0.00069993	0.00747054	-1.24324	-2.20066
GSE3982_EOSINOPHIL_VS_DC_UP	0.00769923	0.0446825	-1.03024	-0.941649
GSE17721_CTRL_VS_PAM3CSK4_4H_BMDM_DN	0.00279972	0.021443	-1.13149	-0.952024
REACTOME_GPCR_DOWNSTREAM_SIGNALING	0.00019998	0.00286483	-1.37972	-0.652262
PANGAS_TUMOR_SUPPRESSION_BY_SMAD1_AND_SMAD5_UP	0.00039996	0.00502807	-1.25645	-1.39803
CHANDRAN_METASTASIS_DN	0.00129987	0.0121584	-1.19645	-0.952024
GSE12845_NAIVE_VS_DARKZONE_GC_TONSIL_BCELL_UP	0.00489951	0.0320587	-1.06221	-0.952024
RHEIN_ALL_GLUCOCORTICOID_THERAPY_UP	0.00069993	0.00747054	-1.16686	-1.63126
GSE12366_GC_VS_NAIVE_BCELL_DN	0.00819918	0.0465196	-1.02994	-0.834316
LINDSTEDT_DENDRITIC_CELL_MATURATION_B	0.00219978	0.0180332	-1.14135	-1.63126
GSE12366_PLASMA_CELL_VS_NAIVE_BCELL_DN	0.00459954	0.0308929	-1.06552	-0.911028
ONDER_CDH1_TARGETS_2_DN	0.0009999	0.00993449	-1.22478	-1.7191
GSE1460_INTRATHYMIC_T_PROGENITOR_VS_NAIVE_CD4_TCELL_ADULT_BLOOD_DN	0.0069993	0.0414574	-1.02682	-0.642863
MULTI_ORGANISM_PROCESS	0.00019998	0.00286483	-1.25991	-1.28162
GSE24634_NAIVE_CD4_TCELL_VS_DAY3_IL4_CONV_TREG_UP	0.00259974	0.0204937	-1.12295	-0.463639
HESS_TARGETS_OF_HOXA9_AND_MEIS1_DN	0.00219978	0.0180332	-1.10069	-1.29061
MCLACHLAN_DENTAL_CARIES_UP	0.00439956	0.0301125	-1.09871	-1.8964
SMID_BREAST_CANCER_RELAPSE_IN_BONE_UP	0.00479952	0.0316445	-1.06775	-0.695422
MARSON_FOXP3_TARGETS_UP	0.00269973	0.0208999	-1.10532	-1.44635
VANHARANTA_UTERINE_FIBROID_DN	0.00019998	0.00286483	-1.3556	-0.96695
HADDAD_B_LYMPHOCYTE_PROGENITOR	0.00159984	0.0142237	-1.1652	-1.74892
GSE360_DC_VS_MAC_DN	0.00819918	0.0465196	-1.01646	-1.06458
GSE9988_LOW_LPS_VS_ANTI_TREM1_AND_LPS_MONOCYTE_UP	0.00219978	0.0180332	-1.15005	-1.08277
ZHANG_TARGETS_OF_EWSR1_FLI1_FUSION	0.00559944	0.0350942	-1.0624	-0.96695
GSE29618_BCELL_VS_MONOCYTE_UP	0.00079992	0.00837198	-1.2433	-1.26759
ROSS_AML_WITH_AML1_ETO_FUSION	0.00309969	0.0229654	-1.13597	-0.941649
GSE10325_LUPUS_BCELL_VS_LUPUS_MYELOID_UP	0.00649935	0.0391413	-1.05237	-1.26774
GSE22886_NAIVE_BCELL_VS_BLOOD_PLASMA_CELL_UP	0.00309969	0.0229654	-1.13036	-0.907172
LINDGREN_BLADDER_CANCER_CLUSTER_2B	9.999e-05	0.00160879	-1.52964	-1.03728
FATTY_ACID_METABOLIC_PROCESS	0.00779922	0.0447806	-1.02757	-0.77702
CSR_LATE_UP.V1_DN	0.0029997	0.0224561	-1.1112	-1.02002
WALLACE_PROSTATE_CANCER_RACE_UP	9.999e-05	0.00160879	-1.5889	-1.49423
SMID_BREAST_CANCER_BASAL_DN	0.00139986	0.0128704	-1.19399	-0.77702
PLASARI_TGFB1_TARGETS_1HR_UP	0.00759924	0.0441616	-1.02542	-2.18079
ZHAN_V1_LATE_DIFFERENTIATION_GENES_UP	9.999e-05	0.00160879	-1.4754	-1.64079
REACTOME_SIGNALING_BY_GPCR	0.00049995	0.00600497	-1.24648	-0.652262
GSE17721_CTRL_VS_GARDIQUIMOD_2H_BMDM_DN	0.0019998	0.016744	-1.15562	-0.938039
GSE17721_PAM3CSK4_VS_GADIQUIMOD_6H_BMDM_DN	0.00119988	0.011472	-1.15771	-0.952024
HOFFMANN_SMALL_PRE_BII_TO_IMMATURE_B_LYMPHOCYTE_UP	0.00569943	0.0354631	-1.04814	-2.59707
GSE3982_BCELL_VS_CENT_MEMORY_CD4_TCELL_UP	0.00069993	0.00747054	-1.24786	-1.06509
ZHAN_MULTIPLE_MYELOMA_MF_UP	0.00019998	0.00286483	-1.37029	-1.29491
BOQUEST_STEM_CELL_DN	9.999e-05	0.00160879	-1.37029	-1.08277
BENPORATH_SUZ12_TARGETS	0.00339966	0.024555	-1.10115	-0.628643
FOSTER_KDM1A_TARGETS_DN	0.00819918	0.0465196	-1.02564	-1.06458
GSE22886_NAIVE_CD8_TCELL_VS_DC_UP	0.00369963	0.0263683	-1.10705	-0.705837
GSE9988_ANTI_TREM1_VS_LOW_LPS_MONOCYTE_DN	0.00069993	0.00747054	-1.26358	-1.08277
GSE7460_CTRL_VS_TGFB_TREATED_ACT_TCONV_DN	0.00159984	0.0142237	-1.1964	-1.26774
GSE17974_IL4_AND_ANTI_IL12_VS_UNTREATED_6H_ACT_CD4_TCELL_UP	0.00569943	0.0354631	-1.05001	-1.13441
REACTOME_G_ALPHA_Q_SIGNALLING_EVENTS	0.00419958	0.0291135	-1.09121	-0.738527
GSE29618_BCELL_VS_MONOCYTE_DAY7_FLU_VACCINE_UP	0.00249975	0.0201099	-1.13963	-1.26774
SANA_RESPONSE_TO_IFNG_UP	0.0029997	0.0224561	-1.08118	-1.26917
LINDGREN_BLADDER_CANCER_HIGH_RECURRENCE	0.00249975	0.0201099	-1.11677	-1.29061
GSE17974_0H_VS_48H_IN_VITRO_ACT_CD4_TCELL_UP	0.00039996	0.00502807	-1.29455	-0.595568
KEGG_NEUROACTIVE_LIGAND_RECEPTOR_INTERACTION	0.00349965	0.0251508	-1.0745	-1.24156
GSE22886_DAY0_VS_DAY1_MONOCYTE_IN_CULTURE_UP	0.00659934	0.0396328	-1.03692	-1.09204
RODWELL_AGING_KIDNEY_UP	0.00159984	0.0142237	-1.17564	-0.941649
NAGASHIMA_EGF_SIGNALING_UP	0.00489951	0.0320587	-1.06636	-1.18165
GSE10325_BCELL_VS_MYELOID_UP	9.999e-05	0.00160879	-1.50122	-1.26759
GSE13411_PLASMA_CELL_VS_MEMORY_BCELL_DN	0.00719928	0.042351	-1.04164	-0.834316
REACTOME_DEVELOPMENTAL_BIOLOGY	0.00609939	0.0373588	-1.04705	-1.08277
GSE7460_CTRL_VS_FOXP3_OVEREXPR_TCONV_DN	0.00209979	0.0174121	-1.1868	-0.717404
GSE29618_BCELL_VS_PDC_UP	9.999e-05	0.00160879	-1.89766	-1.18165
GSE22886_NAIVE_CD8_TCELL_VS_MONOCYTE_DN	0.00059994	0.00671933	-1.25976	-1.06509
GSE26495_PD1HIGH_VS_PD1LOW_CD8_TCELL_UP	0.0009999	0.00993449	-1.25232	-1.54428
GSE17974_IL4_AND_ANTI_IL12_VS_UNTREATED_72H_ACT_CD4_TCELL_DN	0.00039996	0.00502807	-1.29315	-1.63126
GSE22886_IGM_MEMORY_BCELL_VS_BLOOD_PLASMA_CELL_UP	0.00679932	0.0405514	-1.03612	-1.25254
ACOSTA_PROLIFERATION_INDEPENDENT_MYC_TARGETS_DN	0.00889911	0.0496416	-1.01143	-1.01658
ASTON_MAJOR_DEPRESSIVE_DISORDER_DN	0.00129987	0.0121584	-1.18431	-0.856757
ZHONG_RESPONSE_TO_AZACITIDINE_AND_TSA_UP	0.00329967	0.0239532	-1.10989	-0.907512
RUTELLA_RESPONSE_TO_HGF_DN	0.00029997	0.00399219	-1.28128	-1.5434
GSE360_L_DONOVANI_VS_B_MALAYI_LOW_DOSE_DC_UP	0.00019998	0.00286483	-1.37284	-1.09805
RUTELLA_RESPONSE_TO_CSF2RB_AND_IL4_UP	0.00659934	0.0396328	-1.04058	-2.29376
FOSTER_TOLERANT_MACROPHAGE_DN	0.00389961	0.027611	-1.10231	-0.96695
MCBRYAN_PUBERTAL_TGFB1_TARGETS_UP	0.00279972	0.021443	-1.14781	-1.13825
MORI_LARGE_PRE_BII_LYMPHOCYTE_DN	0.00089991	0.00913038	-1.12853	-1.54428
HOEBEKE_LYMPHOID_STEM_CELL_DN	0.00139986	0.0128704	-1.12605	-1.52194
CASORELLI_ACUTE_PROMYELOCYTIC_LEUKEMIA_UP	0.00859914	0.0483435	-1.01427	-0.665479
BCAT.100_UP.V1_UP	0.00059994	0.00671933	-1.14528	-1.63126
REN_ALVEOLAR_RHABDOMYOSARCOMA_UP	0.00039996	0.00502807	-1.27346	-1.44635
ENK_UV_RESPONSE_EPIDERMIS_DN	0.0049995	0.0325156	-1.06422	-0.846123
PHONG_TNF_TARGETS_UP	0.00439956	0.0301125	-1.05013	-0.595568
WANG_HCP_PROSTATE_CANCER	0.00379962	0.0269917	-1.0977	-0.907512
GSE3982_MEMORY_CD4_TCELL_VS_BCELL_DN	0.00039996	0.00502807	-1.26308	-1.06509
RUTELLA_RESPONSE_TO_CSF2RB_AND_IL4_DN	0.00319968	0.0233848	-1.10392	-1.5434
GSE2197_CPG_DNA_VS_UNTREATED_IN_DC_UP	0.00189981	0.0162217	-1.15262	-0.615094
ZHANG_RESPONSE_TO_IKK_INHIBITOR_AND_TNF_UP	0.00719928	0.042351	-1.03851	-0.481179
GSE9006_TYPE_1_DIABETES_AT_DX_VS_4MONTH_POST_DX_PBMC_UP	0.00059994	0.00671933	-1.23822	-1.06509
ZWANG_CLASS_1_TRANSIENTLY_INDUCED_BY_EGF	0.00309969	0.0229654	-1.1149	-1.18165
BMI1_DN_MEL18_DN.V1_UP	0.00619938	0.0378101	-1.05184	-2.58512
ZWANG_EGF_INTERVAL_DN	0.00829917	0.0469017	-1.02931	-0.952024
GSE11057_NAIVE_VS_EFF_MEMORY_CD4_TCELL_DN	0.00569943	0.0354631	-1.05893	-1.09204
HOLLMANN_APOPTOSIS_VIA_CD40_DN	0.00429957	0.0297111	-1.08826	-2.20066
HELLER_HDAC_TARGETS_SILENCED_BY_METHYLATION_UP	0.00609939	0.0373588	-1.0636	-1.79117
MOREAUX_MULTIPLE_MYELOMA_BY_TACI_UP	0.00569943	0.0354631	-1.06254	-0.717236
GSE9006_HEALTHY_VS_TYPE_1_DIABETES_PBMC_4MONTH_POST_DX_UP	0.00159984	0.0142237	-1.168	-1.06509
PRAMOONJAGO_SOX4_TARGETS_UP	0.00119988	0.011472	-1.15517	-1.63126
GSE11057_PBMC_VS_MEM_CD4_TCELL_UP	0.00479952	0.0316445	-1.0622	-0.481179
GSE17974_0H_VS_72H_IN_VITRO_ACT_CD4_TCELL_UP	9.999e-05	0.00160879	-1.28648	-1.07007
GSE17721_CTRL_VS_LPS_4H_BMDM_DN	0.00609939	0.0373588	-1.05276	-0.717236
LENAOUR_DENDRITIC_CELL_MATURATION_DN	0.00459954	0.0308929	-1.0891	-1.01658
GSE29618_BCELL_VS_PDC_DAY7_FLU_VACCINE_UP	9.999e-05	0.00160879	-1.7513	-1.49423
DIRMEIER_LMP1_RESPONSE_EARLY	0.00379962	0.0269917	-1.07257	-1.18165
IL2_UP.V1_UP	0.00079992	0.00837198	-1.1873	-1.24156
PHONG_TNF_RESPONSE_NOT_VIA_P38	9.999e-05	0.00160879	-1.40258	-1.18165
BENPORATH_PRC2_TARGETS	0.00139986	0.0128704	-1.15558	-0.685599
GSE3982_DC_VS_EFF_MEMORY_CD4_TCELL_UP	0.0049995	0.0325156	-1.07418	-0.956546
METAL_ION_TRANSPORT	0.00729927	0.0427062	-1.03663	-0.684437
HALMOS_CEBPA_TARGETS_DN	0.00019998	0.00286483	-1.21303	-2.18079
GSE24634_TEFF_VS_TCONV_DAY3_IN_CULTURE_DN	9.999e-05	0.00160879	-1.3333	-1.41667
GSE22886_CTRL_VS_LPS_24H_DC_DN	0.00029997	0.00399219	-1.48067	-1.74892

## Sheet: GO
	p.val	q.val	sscore	edge
GO:0000018 regulation of DNA recombination	0.00019998	0.00264687	1.26969	0.821782
GO:0000070 mitotic sister chromatid segregation	0.00129987	0.0114942	1.1954	1.37755
GO:0000075 cell cycle checkpoint	9.999e-05	0.00164904	1.40635	0.663842
GO:0000082 G1/S transition of mitotic cell cycle	9.999e-05	0.00164904	1.45618	1.26774
GO:0000083 regulation of transcription involved in G1/S transition of mitotic cell cycle	0.00029997	0.0037778	1.36351	1.26774
GO:0000086 G2/M transition of mitotic cell cycle	0.00089991	0.00903388	1.31651	0.6263
GO:0000226 microtubule cytoskeleton organization	0.00019998	0.00264687	1.37036	0.758121
GO:0000278 mitotic cell cycle	9.999e-05	0.00164904	3.06529	0.998391
GO:0000280 nuclear division	9.999e-05	0.00164904	2.31689	1.28162
GO:0000422 mitophagy	9.999e-05	0.00164904	1.3038	0.684116
GO:0000723 telomere maintenance	0.00089991	0.00903388	1.20243	1.18155
GO:0000724 double-strand break repair via homologous recombination	0.00559944	0.0333399	1.08137	0.710105
GO:0000725 recombinational repair	0.00559944	0.0333399	1.08137	0.710105
GO:0000819 sister chromatid segregation	0.00129987	0.0114942	1.1954	1.37755
GO:0002495 antigen processing and presentation of peptide antigen via MHC class II	0.00269973	0.0196155	1.12978	1.35879
GO:0002504 antigen processing and presentation of peptide or polysaccharide antigen via MHC class II	0.00269973	0.0196155	1.12978	1.35879
GO:0006259 DNA metabolic process	9.999e-05	0.00164904	2.12751	0.707415
GO:0006260 DNA replication	9.999e-05	0.00164904	1.71133	1.18155
GO:0006261 DNA-dependent DNA replication	9.999e-05	0.00164904	1.51437	1.18155
GO:0006271 DNA strand elongation involved in DNA replication	9.999e-05	0.00164904	1.50551	1.18155
GO:0006281 DNA repair	9.999e-05	0.00164904	1.96894	0.6263
GO:0006284 base-excision repair	0.00489951	0.030033	1.07137	1.18155
GO:0006289 nucleotide-excision repair	0.00409959	0.0266217	1.08874	1.18155
GO:0006298 mismatch repair	0.00319968	0.0220163	1.09052	1.18155
GO:0006301 postreplication repair	0.00089991	0.00903388	1.1808	0.903969
GO:0006302 double-strand break repair	9.999e-05	0.00164904	1.50877	0.710105
GO:0006310 DNA recombination	9.999e-05	0.00164904	1.53216	0.586394
GO:0006312 mitotic recombination	0.00019998	0.00264687	1.33359	1.18155
GO:0006323 DNA packaging	9.999e-05	0.00164904	1.58702	0.995251
GO:0006333 chromatin assembly or disassembly	0.00019998	0.00264687	1.36231	0.995251
GO:0006334 nucleosome assembly	0.00129987	0.0114942	1.19028	0.995251
GO:0006336 DNA replication-independent nucleosome assembly	0.00079992	0.00839512	1.22948	0.99884
GO:0006338 chromatin remodeling	0.00039996	0.00483207	1.27435	1.01004
GO:0006354 DNA-templated transcription, elongation	0.0029997	0.0210587	1.13249	1.02186
GO:0006399 tRNA metabolic process	0.00139986	0.0122739	1.19963	0.817082
GO:0006412 translation	0.0029997	0.0210587	1.13488	0.710105
GO:0006413 translational initiation	0.0029997	0.0210587	1.14695	1.06419
GO:0006414 translational elongation	0.00259974	0.0191569	1.13114	0.817082
GO:0006415 translational termination	0.00169983	0.0139065	1.1837	1.06419
GO:0006464 cellular protein modification process	0.00089991	0.00903388	1.28254	0.685865
GO:0006473 protein acetylation	0.00589941	0.0338646	1.05118	0.717236
GO:0006475 internal protein amino acid acetylation	0.00589941	0.0338646	1.05118	0.717236
GO:0006511 ubiquitin-dependent protein catabolic process	0.00179982	0.0144403	1.1779	0.663842
GO:0006518 peptide metabolic process	0.00109989	0.0101581	1.26085	0.710105
GO:0006914 autophagy	0.00709929	0.0390273	1.03736	0.611591
GO:0006950 response to stress	9.999e-05	0.00164904	1.43878	0.895985
GO:0006974 cellular response to DNA damage stimulus	9.999e-05	0.00164904	1.90242	0.67083
GO:0006996 organelle organization	9.999e-05	0.00164904	2.45167	0.430102
GO:0007005 mitochondrion organization	0.00149985	0.0128789	1.20683	0.618518
GO:0007017 microtubule-based process	0.00109989	0.0101581	1.30085	0.868895
GO:0007049 cell cycle	9.999e-05	0.00164904	2.69737	1.26774
GO:0007059 chromosome segregation	9.999e-05	0.00164904	1.67035	1.28162
GO:0007067 mitotic nuclear division	9.999e-05	0.00164904	2.19201	1.37755
GO:0007076 mitotic chromosome condensation	0.00049995	0.00570822	1.30228	1.96332
GO:0007093 mitotic cell cycle checkpoint	0.00629937	0.0355709	1.04471	1.28162
GO:0007126 meiotic nuclear division	0.00069993	0.00753603	1.29347	0.998391
GO:0007346 regulation of mitotic cell cycle	0.00019998	0.00264687	1.39067	1.28162
GO:0008150 biological_process	9.999e-05	0.00164904	2.76247	0.430102
GO:0008283 cell proliferation	0.00489951	0.030033	1.05759	1.01072
GO:0009058 biosynthetic process	9.999e-05	0.00164904	1.62864	0.805504
GO:0009059 macromolecule biosynthetic process	9.999e-05	0.00164904	1.80899	0.805504
GO:0009267 cellular response to starvation	0.00739926	0.0403561	1.03805	0.611591
GO:0009314 response to radiation	0.00949905	0.0493476	1.00677	0.716517
GO:0009408 response to heat	0.00719928	0.0394726	1.04388	1.45918
GO:0009411 response to UV	0.0049995	0.0305558	1.07864	0.821782
GO:0009987 cellular process	9.999e-05	0.00164904	2.73498	0.430102
GO:0010212 response to ionizing radiation	0.00529947	0.0320125	1.07233	0.895985
GO:0010564 regulation of cell cycle process	0.00019998	0.00264687	1.43539	1.26774
GO:0010833 telomere maintenance via telomere lengthening	9.999e-05	0.00164904	1.49362	1.18155
GO:0010948 negative regulation of cell cycle process	0.00829917	0.0441066	1.02511	0.663842
GO:0016043 cellular component organization	9.999e-05	0.00164904	1.98346	0.430102
GO:0016236 macroautophagy	0.00169983	0.0139065	1.17626	0.611591
GO:0016567 protein ubiquitination	0.00539946	0.032522	1.06049	0.639721
GO:0016573 histone acetylation	0.00589941	0.0338646	1.05118	0.717236
GO:0016925 protein sumoylation	0.00049995	0.00570822	1.27047	1.41173
GO:0018393 internal peptidyl-lysine acetylation	0.00589941	0.0338646	1.05118	0.717236
GO:0018394 peptidyl-lysine acetylation	0.00589941	0.0338646	1.05118	0.717236
GO:0019080 viral gene expression	0.00489951	0.030033	1.08073	1.20956
GO:0019083 viral transcription	0.00489951	0.030033	1.08073	1.20956
GO:0019538 protein metabolic process	0.00019998	0.00264687	1.54851	0.663842
GO:0019882 antigen processing and presentation	0.00189981	0.0150107	1.12884	1.35879
GO:0019886 antigen processing and presentation of exogenous peptide antigen via MHC class II	0.00269973	0.0196155	1.12978	1.35879
GO:0019941 modification-dependent protein catabolic process	0.00179982	0.0144403	1.1779	0.663842
GO:0019985 translesion synthesis	0.00419958	0.0271016	1.06946	1.18155
GO:0022402 cell cycle process	9.999e-05	0.00164904	2.64192	1.26774
GO:0022411 cellular component disassembly	9.999e-05	0.00164904	1.82503	0.944894
GO:0022616 DNA strand elongation	9.999e-05	0.00164904	1.50551	1.18155
GO:0030261 chromosome condensation	0.00019998	0.00264687	1.46024	1.96332
GO:0031055 chromatin remodeling at centromere	9.999e-05	0.00164904	1.52219	1.31356
GO:0031145 anaphase-promoting complex-dependent proteasomal ubiquitin-dependent protein catabolic process	0.00219978	0.0168677	1.17021	0.663842
GO:0031497 chromatin assembly	0.00189981	0.0150107	1.19111	0.995251
GO:0031570 DNA integrity checkpoint	0.0019998	0.0156225	1.15195	0.689591
GO:0032200 telomere organization	0.00089991	0.00903388	1.20243	1.18155
GO:0032446 protein modification by small protein conjugation	0.00089991	0.00903388	1.20317	0.8046
GO:0032543 mitochondrial translation	0.00169983	0.0139065	1.1837	1.06419
GO:0032984 macromolecular complex disassembly	9.999e-05	0.00164904	1.34627	1.0344
GO:0033043 regulation of organelle organization	0.00219978	0.0168677	1.18213	0.663842
GO:0033044 regulation of chromosome organization	0.0009999	0.00975489	1.25645	0.857569
GO:0033260 nuclear DNA replication	0.00419958	0.0271016	1.07859	1.18155
GO:0033554 cellular response to stress	9.999e-05	0.00164904	2.03942	0.611591
GO:0034080 CENP-A containing nucleosome assembly	0.00019998	0.00264687	1.41274	1.31356
GO:0034502 protein localization to chromosome	0.0019998	0.0156225	1.16957	0.758121
GO:0034508 centromere complex assembly	9.999e-05	0.00164904	1.52219	1.31356
GO:0034605 cellular response to heat	0.0009999	0.00975489	1.20991	1.45918
GO:0034622 cellular macromolecular complex assembly	0.00309969	0.0215423	1.11952	0.994924
GO:0034645 cellular macromolecule biosynthetic process	9.999e-05	0.00164904	1.66179	0.805504
GO:0034724 DNA replication-independent nucleosome organization	0.00079992	0.00839512	1.22948	0.99884
GO:0034728 nucleosome organization	0.00039996	0.00483207	1.2804	0.995251
GO:0036211 protein modification process	0.00089991	0.00903388	1.28254	0.685865
GO:0042594 response to starvation	0.00739926	0.0403561	1.03805	0.611591
GO:0042769 DNA damage response, detection of DNA damage	9.999e-05	0.00164904	1.36842	1.18155
GO:0043043 peptide biosynthetic process	0.0029997	0.0210587	1.13488	0.710105
GO:0043044 ATP-dependent chromatin remodeling	9.999e-05	0.00164904	1.51692	1.0344
GO:0043241 protein complex disassembly	9.999e-05	0.00164904	1.34627	1.0344
GO:0043412 macromolecule modification	0.00049995	0.00570822	1.38085	0.685865
GO:0043486 histone exchange	0.00019998	0.00264687	1.41274	1.31356
GO:0043543 protein acylation	0.00589941	0.0338646	1.05118	0.717236
GO:0043603 cellular amide metabolic process	0.00049995	0.00570822	1.27849	0.710105
GO:0043604 amide biosynthetic process	0.0029997	0.0210587	1.13488	0.710105
GO:0043624 cellular protein complex disassembly	9.999e-05	0.00164904	1.2462	1.05463
GO:0043632 modification-dependent macromolecule catabolic process	0.00179982	0.0144403	1.1779	0.663842
GO:0043933 macromolecular complex subunit organization	0.00019998	0.00264687	1.52634	0.710105
GO:0044248 cellular catabolic process	0.00069993	0.00753603	1.21526	0.663842
GO:0044249 cellular biosynthetic process	9.999e-05	0.00164904	1.6006	0.710105
GO:0044257 cellular protein catabolic process	0.00379962	0.0252256	1.1095	0.663842
GO:0044265 cellular macromolecule catabolic process	0.00309969	0.0215423	1.13421	0.663842
GO:0044267 cellular protein metabolic process	0.00019998	0.00264687	1.54833	0.663842
GO:0044699 single-organism process	9.999e-05	0.00164904	2.0792	0.555572
GO:0044710 single-organism metabolic process	9.999e-05	0.00164904	2.17911	0.530065
GO:0044711 single-organism biosynthetic process	0.00029997	0.0037778	1.37631	1.06419
GO:0044763 single-organism cellular process	9.999e-05	0.00164904	2.13696	0.703622
GO:0044770 cell cycle phase transition	9.999e-05	0.00164904	1.72366	0.6263
GO:0044772 mitotic cell cycle phase transition	9.999e-05	0.00164904	1.89646	0.6263
GO:0044786 cell cycle DNA replication	0.00039996	0.00483207	1.38839	1.18155
GO:0044839 cell cycle G2/M phase transition	0.00159984	0.0135693	1.19598	0.6263
GO:0044843 cell cycle G1/S phase transition	9.999e-05	0.00164904	1.45618	1.26774
GO:0045786 negative regulation of cell cycle	0.00229977	0.0174413	1.18278	0.663842
GO:0045930 negative regulation of mitotic cell cycle	0.00059994	0.00666671	1.27748	1.16945
GO:0048002 antigen processing and presentation of peptide antigen	0.00189981	0.0150107	1.12884	1.35879
GO:0048285 organelle fission	9.999e-05	0.00164904	2.34439	1.28162
GO:0050896 response to stimulus	0.00249975	0.0185517	1.13705	1.26774
GO:0051052 regulation of DNA metabolic process	0.00409959	0.0266217	1.09308	0.710105
GO:0051276 chromosome organization	9.999e-05	0.00164904	2.03289	0.710105
GO:0051301 cell division	9.999e-05	0.00164904	1.8541	1.37755
GO:0051302 regulation of cell division	0.00149985	0.0128789	1.15142	1.37755
GO:0051304 chromosome separation	0.00389961	0.0256436	1.08232	0.663842
GO:0051321 meiotic cell cycle	0.00209979	0.0162207	1.19421	0.998391
GO:0051340 regulation of ligase activity	0.00169983	0.0139065	1.13901	0.663842
GO:0051351 positive regulation of ligase activity	0.00319968	0.0220163	1.10651	0.689591
GO:0051439 regulation of ubiquitin-protein ligase activity involved in mitotic cell cycle	0.00429957	0.0273226	1.0823	0.663842
GO:0051443 positive regulation of ubiquitin-protein transferase activity	0.00319968	0.0220163	1.10651	0.689591
GO:0051603 proteolysis involved in cellular protein catabolic process	0.00379962	0.0252256	1.1095	0.663842
GO:0051653 spindle localization	0.00589941	0.0338646	1.04363	0.868895
GO:0051716 cellular response to stimulus	0.00359964	0.0242073	1.12217	0.663842
GO:0051726 regulation of cell cycle	9.999e-05	0.00164904	1.47219	1.26774
GO:0051782 negative regulation of cell division	0.0019998	0.0156225	1.1531	1.37755
GO:0051783 regulation of nuclear division	0.00439956	0.0277039	1.08194	1.37755
GO:0051784 negative regulation of nuclear division	0.00179982	0.0144403	1.14253	1.37755
GO:0051983 regulation of chromosome segregation	0.00159984	0.0135693	1.17446	0.663842
GO:0060249 anatomical structure homeostasis	0.00359964	0.0242073	1.1212	1.18155
GO:0061640 cytoskeleton-dependent cytokinesis	0.00779922	0.041878	1.01959	1.05463
GO:0061641 CENP-A containing chromatin organization	0.00019998	0.00264687	1.41274	1.31356
GO:0061726 mitochondrion disassembly	9.999e-05	0.00164904	1.3038	0.684116
GO:0065003 macromolecular complex assembly	0.00809919	0.0432651	1.03057	1.26759
GO:0065004 protein-DNA complex assembly	9.999e-05	0.00164904	1.39872	0.995251
GO:0065007 biological regulation	0.00909909	0.0479896	1.01469	0.998391
GO:0070124 mitochondrial translational initiation	0.00169983	0.0139065	1.1837	1.06419
GO:0070125 mitochondrial translational elongation	0.00169983	0.0139065	1.1837	1.06419
GO:0070126 mitochondrial translational termination	0.00169983	0.0139065	1.1837	1.06419
GO:0070647 protein modification by small protein conjugation or removal	0.00019998	0.00264687	1.32068	0.8046
GO:0071103 DNA conformation change	9.999e-05	0.00164904	1.78026	0.995251
GO:0071822 protein complex subunit organization	0.00089991	0.00903388	1.19879	0.995251
GO:0071824 protein-DNA complex subunit organization	9.999e-05	0.00164904	1.47769	0.995251
GO:0071840 cellular component organization or biogenesis	9.999e-05	0.00164904	2.07929	0.430102
GO:0071897 DNA biosynthetic process	0.00129987	0.0114942	1.18673	1.18155
GO:0080134 regulation of response to stress	0.00679932	0.0379811	1.04872	0.620763
GO:0080135 regulation of cellular response to stress	9.999e-05	0.00164904	1.51033	0.903969
GO:0090305 nucleic acid phosphodiester bond hydrolysis	0.00809919	0.0432651	1.02917	0.611618
GO:0098813 nuclear chromosome segregation	0.00049995	0.00570822	1.27772	1.28162
GO:1900034 regulation of cellular response to heat	0.00079992	0.00839512	1.20352	1.45918
GO:1901576 organic substance biosynthetic process	9.999e-05	0.00164904	1.62683	0.805504
GO:1901987 regulation of cell cycle phase transition	0.00169983	0.0139065	1.20011	0.663842
GO:1901990 regulation of mitotic cell cycle phase transition	0.00029997	0.0037778	1.38156	0.663842
GO:1901991 negative regulation of mitotic cell cycle phase transition	0.0069993	0.0385797	1.0382	1.28162
GO:1902589 single-organism organelle organization	9.999e-05	0.00164904	2.26995	0.903969
GO:1903008 organelle disassembly	9.999e-05	0.00164904	1.3855	0.684116
GO:1903046 meiotic cell cycle process	0.00069993	0.00753603	1.29347	0.998391
GO:1903047 mitotic cell cycle process	9.999e-05	0.00164904	2.74967	1.26774
GO:1903320 regulation of protein modification by small protein conjugation or removal	0.00589941	0.0338646	1.05697	0.663842
GO:1903322 positive regulation of protein modification by small protein conjugation or removal	0.00939906	0.0491971	1.01365	0.86541
GO:2001020 regulation of response to DNA damage stimulus	0.00059994	0.00666671	1.26434	0.903969
GO:0000228 nuclear chromosome	9.999e-05	0.00164904	1.76113	0.995251
GO:0000428 DNA-directed RNA polymerase complex	0.0009999	0.00975489	1.27022	1.12204
GO:0000775 chromosome, centromeric region	9.999e-05	0.00164904	2.05822	1.31356
GO:0000776 kinetochore	9.999e-05	0.00164904	1.81402	1.31356
GO:0000777 condensed chromosome kinetochore	9.999e-05	0.00164904	1.81402	1.31356
GO:0000779 condensed chromosome, centromeric region	9.999e-05	0.00164904	1.91503	1.31356
GO:0000781 chromosome, telomeric region	0.00089991	0.00903388	1.18187	1.28162
GO:0000784 nuclear chromosome, telomeric region	0.00029997	0.0037778	1.34786	1.28162
GO:0000793 condensed chromosome	9.999e-05	0.00164904	2.29211	1.28162
GO:0000794 condensed nuclear chromosome	0.00069993	0.00753603	1.26098	1.28162
GO:0005643 nuclear pore	0.00949905	0.0493476	1.0035	0.530065
GO:0005654 nucleoplasm	9.999e-05	0.00164904	2.37038	0.485642
GO:0005694 chromosome	9.999e-05	0.00164904	2.49851	0.995251
GO:0005737 cytoplasm	9.999e-05	0.00164904	2.28937	0.430102
GO:0005739 mitochondrion	9.999e-05	0.00164904	1.78086	0.481346
GO:0005740 mitochondrial envelope	0.00049995	0.00570822	1.30625	0.618518
GO:0005743 mitochondrial inner membrane	0.00069993	0.00753603	1.30577	0.718829
GO:0005758 mitochondrial intermembrane space	0.00939906	0.0491971	1.00302	0.504985
GO:0005759 mitochondrial matrix	0.00039996	0.00483207	1.38422	0.707415
GO:0005813 centrosome	0.00019998	0.00264687	1.39964	0.868895
GO:0005815 microtubule organizing center	0.00119988	0.0108407	1.22505	0.868895
GO:0005819 spindle	0.0009999	0.00975489	1.23111	0.758121
GO:0005829 cytosol	0.00019998	0.00264687	1.39374	0.944894
GO:0005856 cytoskeleton	0.00869913	0.0459969	1.01765	1.37755
GO:0005871 kinesin complex	0.00279972	0.0200614	1.11027	1.74892
GO:0005874 microtubule	9.999e-05	0.00164904	1.576	1.3837
GO:0005876 spindle microtubule	0.00019998	0.00264687	1.39586	1.3837
GO:0015630 microtubule cytoskeleton	9.999e-05	0.00164904	1.44614	1.37755
GO:0016591 DNA-directed RNA polymerase II, holoenzyme	0.00529947	0.0320125	1.05455	1.12204
GO:0019866 organelle inner membrane	0.00019998	0.00264687	1.37333	0.718829
GO:0030880 RNA polymerase complex	0.0009999	0.00975489	1.27022	1.12204
GO:0031966 mitochondrial membrane	0.00019998	0.00264687	1.34014	0.618518
GO:0031967 organelle envelope	9.999e-05	0.00164904	1.58491	0.610964
GO:0031974 membrane-enclosed lumen	9.999e-05	0.00164904	2.80644	0.481346
GO:0031975 envelope	9.999e-05	0.00164904	1.58491	0.610964
GO:0031981 nuclear lumen	9.999e-05	0.00164904	2.64434	0.481346
GO:0032991 macromolecular complex	9.999e-05	0.00164904	2.34767	0.564966
GO:0043228 non-membrane-bounded organelle	9.999e-05	0.00164904	2.14115	0.994924
GO:0043232 intracellular non-membrane-bounded organelle	9.999e-05	0.00164904	2.14115	0.994924
GO:0043233 organelle lumen	9.999e-05	0.00164904	2.74508	0.481346
GO:0043234 protein complex	9.999e-05	0.00164904	2.3211	0.564966
GO:0043596 nuclear replication fork	0.00759924	0.0409099	1.03126	0.821782
GO:0044427 chromosomal part	9.999e-05	0.00164904	2.3713	0.995251
GO:0044428 nuclear part	9.999e-05	0.00164904	2.73739	0.481346
GO:0044429 mitochondrial part	0.00019998	0.00264687	1.54135	0.707415
GO:0044430 cytoskeletal part	0.00029997	0.0037778	1.39824	1.37755
GO:0044444 cytoplasmic part	9.999e-05	0.00164904	1.76312	0.903046
GO:0044446 intracellular organelle part	9.999e-05	0.00164904	2.77857	0.430102
GO:0044451 nucleoplasm part	0.00109989	0.0101581	1.2248	0.485642
GO:0044454 nuclear chromosome part	9.999e-05	0.00164904	1.65443	0.995251
GO:0055029 nuclear DNA-directed RNA polymerase complex	0.0009999	0.00975489	1.27022	1.12204
GO:0061695 transferase complex, transferring phosphorus-containing groups	0.00149985	0.0128789	1.17462	0.530772
GO:0070013 intracellular organelle lumen	9.999e-05	0.00164904	2.75163	0.481346
GO:0072686 mitotic spindle	0.00369963	0.0247197	1.0986	1.85987
GO:0098687 chromosomal region	9.999e-05	0.00164904	2.33107	1.28162
GO:1902494 catalytic complex	9.999e-05	0.00164904	1.72174	0.530772
GO:1990234 transferase complex	9.999e-05	0.00164904	1.75393	0.530772
GO:0000166 nucleotide binding	0.00039996	0.00483207	1.23717	0.446534
GO:0001882 nucleoside binding	0.00109989	0.0101581	1.21977	0.460915
GO:0001883 purine nucleoside binding	0.00109989	0.0101581	1.21977	0.460915
GO:0003678 DNA helicase activity	0.00269973	0.0196155	1.12848	1.01004
GO:0003684 damaged DNA binding	0.00139986	0.0122739	1.19464	0.707415
GO:0003735 structural constituent of ribosome	0.00369963	0.0247197	1.08114	0.994924
GO:0004003 ATP-dependent DNA helicase activity	0.00109989	0.0101581	1.22243	1.01004
GO:0004175 endopeptidase activity	0.00749925	0.0404765	1.0306	0.895985
GO:0004527 exonuclease activity	0.00689931	0.0382314	1.03898	0.611618
GO:0005198 structural molecule activity	0.00389961	0.0256436	1.08331	0.994924
GO:0005524 ATP binding	0.00119988	0.0108407	1.19496	0.460915
GO:0008017 microtubule binding	0.00029997	0.0037778	1.32286	1.74892
GO:0008234 cysteine-type peptidase activity	0.00489951	0.030033	1.07853	0.530065
GO:0015631 tubulin binding	0.00019998	0.00264687	1.40508	1.74892
GO:0016740 transferase activity	9.999e-05	0.00164904	1.76053	0.504985
GO:0016772 transferase activity, transferring phosphorus-containing groups	0.00329967	0.022481	1.09933	1.17361
GO:0017076 purine nucleotide binding	0.00079992	0.00839512	1.24203	0.460915
GO:0030554 adenyl nucleotide binding	0.00109989	0.0101581	1.18317	0.460915
GO:0031625 ubiquitin protein ligase binding	0.00569943	0.0335508	1.05407	0.703622
GO:0032403 protein complex binding	0.00669933	0.0375235	1.06271	1.74892
GO:0032549 ribonucleoside binding	0.00109989	0.0101581	1.21977	0.460915
GO:0032550 purine ribonucleoside binding	0.00109989	0.0101581	1.21977	0.460915
GO:0032553 ribonucleotide binding	0.00119988	0.0108407	1.20621	0.460915
GO:0032555 purine ribonucleotide binding	0.00119988	0.0108407	1.20621	0.460915
GO:0032559 adenyl ribonucleotide binding	0.00189981	0.0150107	1.15181	0.460915
GO:0035639 purine ribonucleoside triphosphate binding	0.00109989	0.0101581	1.26519	0.460915
GO:0036094 small molecule binding	0.00209979	0.0162207	1.14642	0.460915
GO:0043168 anion binding	0.00749925	0.0404765	1.02316	0.460915
GO:0044389 ubiquitin-like protein ligase binding	0.00569943	0.0335508	1.05407	0.703622
GO:0061630 ubiquitin protein ligase activity	0.00429957	0.0273226	1.10996	0.703622
GO:0097367 carbohydrate derivative binding	0.00389961	0.0256436	1.08221	0.460915
GO:1901265 nucleoside phosphate binding	0.00039996	0.00483207	1.23717	0.446534
GO:0001906 cell killing	0.00609939	0.0347247	-1.0461	-1.26917
GO:0002274 myeloid leukocyte activation	0.00239976	0.0180025	-1.16841	-1.19717
GO:0006935 chemotaxis	0.00409959	0.0266217	-1.09623	-1.08277
GO:0006936 muscle contraction	0.00459954	0.0287887	-1.07454	-1.40736
GO:0007154 cell communication	0.00589941	0.0338646	-1.05996	-1.15714
GO:0007165 signal transduction	0.00329967	0.022481	-1.09626	-1.13441
GO:0007610 behavior	9.999e-05	0.00164904	-1.36471	-0.530065
GO:0007626 locomotory behavior	0.00059994	0.00666671	-1.28054	-0.576254
GO:0009617 response to bacterium	0.00019998	0.00264687	-1.29806	-0.956546
GO:0010466 negative regulation of peptidase activity	9.999e-05	0.00164904	-1.32432	-1.15714
GO:0010876 lipid localization	0.00509949	0.0310755	-1.09657	-0.883059
GO:0010951 negative regulation of endopeptidase activity	9.999e-05	0.00164904	-1.32432	-1.15714
GO:0016477 cell migration	0.00689931	0.0382314	-1.04369	-1.15714
GO:0023052 signaling	0.00149985	0.0128789	-1.20009	-1.08277
GO:0030029 actin filament-based process	0.00429957	0.0273226	-1.07822	-1.08277
GO:0030036 actin cytoskeleton organization	0.00659934	0.0370633	-1.03952	-1.08277
GO:0030534 adult behavior	0.00619938	0.0351976	-1.05728	-0.576254
GO:0040011 locomotion	9.999e-05	0.00164904	-1.42741	-1.08277
GO:0040012 regulation of locomotion	0.00209979	0.0162207	-1.1703	-1.15714
GO:0042330 taxis	0.00409959	0.0266217	-1.09623	-1.08277
GO:0043087 regulation of GTPase activity	0.00079992	0.00839512	-1.25416	-0.548093
GO:0043281 regulation of cysteine-type endopeptidase activity involved in apoptotic process	0.00279972	0.0200614	-1.13321	-1.52194
GO:0043547 positive regulation of GTPase activity	0.00039996	0.00483207	-1.3021	-0.548093
GO:0044700 single organism signaling	0.00179982	0.0144403	-1.17619	-1.13441
GO:0044708 single-organism behavior	0.00019998	0.00264687	-1.31038	-0.576254
GO:0046578 regulation of Ras protein signal transduction	0.00169983	0.0139065	-1.18898	-0.433942
GO:0048870 cell motility	0.00249975	0.0185517	-1.14331	-1.15714
GO:0050790 regulation of catalytic activity	0.00439956	0.0277039	-1.09733	-0.941649
GO:0051056 regulation of small GTPase mediated signal transduction	0.00019998	0.00264687	-1.4321	-0.433942
GO:0051270 regulation of cellular component movement	0.00629937	0.0355709	-1.04074	-1.15714
GO:0051336 regulation of hydrolase activity	9.999e-05	0.00164904	-1.34458	-0.800279
GO:0051345 positive regulation of hydrolase activity	0.00069993	0.00753603	-1.24787	-0.548093
GO:0051346 negative regulation of hydrolase activity	0.00529947	0.0320125	-1.0784	-0.878081
GO:0051674 localization of cell	0.00249975	0.0185517	-1.14331	-1.15714
GO:0052547 regulation of peptidase activity	0.00049995	0.00570822	-1.27368	-1.15714
GO:0052548 regulation of endopeptidase activity	0.00049995	0.00570822	-1.27368	-1.15714
GO:0070887 cellular response to chemical stimulus	0.0059994	0.0342493	-1.05683	-1.19717
GO:0071241 cellular response to inorganic substance	0.00869913	0.0459969	-1.01402	-0.505283
GO:0071310 cellular response to organic substance	0.00569943	0.0335508	-1.05329	-1.41667
GO:0071417 cellular response to organonitrogen compound	0.00689931	0.0382314	-1.03913	-1.74892
GO:0071495 cellular response to endogenous stimulus	0.0059994	0.0342493	-1.05347	-0.58824
GO:1902531 regulation of intracellular signal transduction	0.00349965	0.0236882	-1.09961	-1.15714
GO:2000116 regulation of cysteine-type endopeptidase activity	0.00279972	0.0200614	-1.13321	-1.52194
GO:2000145 regulation of cell motility	0.00819918	0.0436869	-1.0232	-1.15714
GO:0003779 actin binding	0.00049995	0.00570822	-1.39997	-1.51755
GO:0004857 enzyme inhibitor activity	0.00429957	0.0273226	-1.08845	-1.19717
GO:0004872 receptor activity	0.00349965	0.0236882	-1.12469	-1.15714
GO:0005085 guanyl-nucleotide exchange factor activity	0.00659934	0.0370633	-1.04296	-0.564966
GO:0008047 enzyme activator activity	0.00109989	0.0101581	-1.19937	-0.800279
GO:0022836 gated channel activity	0.00229977	0.0174413	-1.14368	-0.684437
GO:0030234 enzyme regulator activity	0.00059994	0.00666671	-1.29507	-0.941649
GO:0060089 molecular transducer activity	0.00259974	0.0191569	-1.14078	-1.15714
GO:0061134 peptidase regulator activity	0.00019998	0.00264687	-1.29902	-1.52194
GO:0098772 molecular function regulator	9.999e-05	0.00164904	-1.365	-0.53606
